# Supplementary material
Source: Springer Nature journal article supplement (https://www.um.edu.mt/library/oar/bitstream/123456789/144705/2/41982_2026_255_MOESM1_ESM.pdf)
Supplement: MOESM1 [file 41982_2026_255_MOESM1_ESM.pdf]

Supplementary Information: **Assessing the potential of latent class modelling for classifying stone artefacts and the quantification of technological diversity** (Journal of Paleolithic Archaeology)

Lucy Timbrell<sup>1,2\*</sup>, Matt Grove<sup>2</sup>, Eleanor Scerri<sup>1,3,4</sup>

<sup>1</sup> Human Palaeosystems Group, Max Planck Institute of Geoanthropology, Jena, Germany

<sup>2</sup> Department of Archaeology, Classics and Egyptology, University of Liverpool, Liverpool, United Kingdom

<sup>3</sup> Department of Classics and Archaeology, University of Malta, Msida, Malta

<sup>4</sup> Department of Prehistoric Archaeology, University of Cologne, Cologne, Germany

\* Corresponding author: L Timbrell ([lucy.timbrell2@liverpool.ac.uk](mailto:lucy.timbrell2@liverpool.ac.uk))

**Supplementary Information S1.**

Glossary of terminology used to define attribute states (manifest variables). Extended definitions and rationale for recording each variable are presented in Scerri et al. (2014, Supplementary Online Material).

|                                 |            |                                                                                                                                                                                                                                                                  |
|---------------------------------|------------|------------------------------------------------------------------------------------------------------------------------------------------------------------------------------------------------------------------------------------------------------------------|
| <b>Tool laminarity</b>          | -          | -                                                                                                                                                                                                                                                                |
| <b>Tool vertical convexity</b>  | -          | -                                                                                                                                                                                                                                                                |
| <b>Lateral edge type</b>        | Converging | Edges converge toward the distal end of the piece for the majority of the blank length, i.e., more than half of the length of the flake has lateral edges converging together at an angle greater than 30° from the axis of propagation (Tostevin 2011, pp. 133) |
|                                 | Ovoid      | Edges both expand and converge, producing rounded lateral edges, with roughly equal parts of the length of the flake having lateral edges expanding then converging (Tostevin 2011, pp. 133)                                                                     |
|                                 | Expanding  | Edges are divergent, expanding toward the distal end of the piece for the majority of the blank length, i.e., more than half of the length of the flake has edges expanding at an angle greater than 30° from the axis of propagation (Tostevin 2011, pp. 133).  |
|                                 | Parallel   | Edges run roughly parallel to each other along most of its length. The width remains relatively uniform from proximal (platform) to distal end (sensu Andresky 2005).                                                                                            |
| <b>Shape of distal terminus</b> | Feathered  | Dorsal view of the distal end of the flake tapers to an extremely thin edge (Andresky 2005, pp. 20, 87).                                                                                                                                                         |
|                                 | Pointed    | Dorsal view of the distal end of flake is pointed i.e., the edges of the distal-most point of the blank form an angle <60° when a goniometer is placed on the distal termination. (Tostevin 2011, pp. 137; Andresky 2005, pp. 20, 87).                           |

|                                      |                 |                                                                                                                                                                                                                                                                                                                                                                                                                                                                                                                   |
|--------------------------------------|-----------------|-------------------------------------------------------------------------------------------------------------------------------------------------------------------------------------------------------------------------------------------------------------------------------------------------------------------------------------------------------------------------------------------------------------------------------------------------------------------------------------------------------------------|
|                                      | Blunt           | Dorsal view of the distal end of flake is blunt, i.e., the edges of the distal-most point of the blank form an angle $>60^\circ$ when a goniometer is placed on the distal termination. (Tostevin 2011, pp. 137; Andresky 2005, pp. 20, 87).                                                                                                                                                                                                                                                                      |
|                                      | Overshot/Plunge | A flake removal that continues past the opposite edge of the core, “plunging” across the core surface. Essentially, the flake extends so far that it removes part of the opposite margin (Andresky 2005, pp. 20, 87)                                                                                                                                                                                                                                                                                              |
|                                      | Step            | A flake whose distal end stops abruptly rather than thinning to a point, leaving a stepped or broken appearance (Andresky 2005, pp. 20, 87)                                                                                                                                                                                                                                                                                                                                                                       |
|                                      | Hinge           | The flake curves downward at the distal end, creating a rounded or “hinged” look rather than a sharp point (Andresky 2005, pp. 20, 87).                                                                                                                                                                                                                                                                                                                                                                           |
| <b>Curvature of the profile</b>      | Straight        | This attribute-state depends upon a measure of the curvature of the blank profile, i.e., the distance between the midpoint of the length on the ventral surface of the piece to the top of the table surface on which the distal and proximal tips rest. For straight profiles, this measurement does not exceed 1/8 of the blank length. Also, “straight” is chosen when the distal half twists less than 45 degrees in either direction relative to the flat profile of the platform. (Tostevin 2011, pp. 134). |
|                                      | Curved          | The curvature measurement exceeds 1/8 of the blank length. Also, “curved” requires that the distal half twists less than 45 degrees in either direction relative to the flat profile of the platform (Tostevin 2011, pp. 134).                                                                                                                                                                                                                                                                                    |
|                                      | Concorde        | (sensu Meignen and Bar-Yosef 1991): the distal-most 1/3 of the blank length bends down at a striking angle. This attribute-state can be subsumed under “curved” in pair-wise assemblage comparison (Tostevin 2011, pp. 134).                                                                                                                                                                                                                                                                                      |
|                                      | Twisted         | Distal tip of the piece is twisted at least 45 degrees either direction of a flat profile relative to the platform. The piece may be “curved” as well but “twisted” supersedes “curved” in the typology. (Tostevin 2011, pp. 134).                                                                                                                                                                                                                                                                                |
| <b>Unique application of retouch</b> | Abrupt          | More than $60^\circ$ (Scerri et al. 2014, SOM; Tostevin 2011, pp. 137)                                                                                                                                                                                                                                                                                                                                                                                                                                            |
|                                      | Semi abrupt     | Between 30 and $60^\circ$ (Scerri et al. 2014, SOM; Tostevin 2011, pp. 137)                                                                                                                                                                                                                                                                                                                                                                                                                                       |
|                                      | Flat            | Less than $30^\circ$ (Scerri et al. 2014, SOM; Tostevin 2011, pp. 137)                                                                                                                                                                                                                                                                                                                                                                                                                                            |
|                                      | Dorsal          | Outer, exterior surface of the flake or tool that was once on the outside of the original stone core (Tostevin 2011, pp. 137)                                                                                                                                                                                                                                                                                                                                                                                     |

|                                 |                                   |                                                                                                                                                                                                                      |
|---------------------------------|-----------------------------------|----------------------------------------------------------------------------------------------------------------------------------------------------------------------------------------------------------------------|
|                                 | Ventral                           | Interior-facing side, the surface that was against the core when it was struck off. (Tostevin 2011, pp. 137)                                                                                                         |
|                                 | Bifacial                          | Retouch on both faces (Tostevin 2011, pp. 137)                                                                                                                                                                       |
| <b>Active edge retouch type</b> | Regular                           | Retouch of consistent size and spacing along the active edge, creating a uniform edge.                                                                                                                               |
|                                 | Irregular                         | Retouching that varies significantly in size, spacing, or orientation; produces a less uniform edge.                                                                                                                 |
|                                 | Denticulated                      | Small, regular tooth-like notches along the active edge, resembling a saw (Whittaker 1994, Fig 7.20)                                                                                                                 |
|                                 | Serrated                          | Fine, closely spaced, tooth-like retouch along the edge; can overlap with denticulated but usually smaller scale (Whittaker 1994, Fig 7.20)                                                                          |
|                                 | Notched                           | One or more distinct recesses or indentations along the edge (Whittaker 1994, pp. 129). Only considered if they are complex due to the potential of notching through taphonomic processes (Scerri et al. 2014; SOM). |
|                                 | Piercer                           | Edge modified to form a pointed tip for piercing or perforating (Scerri et al. 2014; SOM).                                                                                                                           |
|                                 | Pressure flaking                  | Small flakes removed by pressing rather than striking, usually for fine edge shaping (Andrefsky 2005, pp 133)                                                                                                        |
|                                 | Scalar                            | Retouch produces step-like removals along the edge.                                                                                                                                                                  |
|                                 | Truncation                        | Edge intentionally cut off or flattened to create a straight or shortened end (Scerri et al. 2014; SOM).                                                                                                             |
|                                 | Burination                        | A technique in which a flake or blade is struck along its edge (often the distal end) to produce a chisel-like tool, characterized by a narrow, steep, burin spall removal (Whittaker 1994, pp 118).                 |
|                                 | <b>Inactive edge retouch type</b> | Basal thinning                                                                                                                                                                                                       |
| Backing                         |                                   | Retouch along the opposite edge of a working edge to produce a blunted edge for safe handling or hafting. (Scerri et al. 2014; SOM)                                                                                  |
| Tangling                        |                                   | Creation of a tang (narrow stem) at the base for hafting via retouch (Scerri et al. 2014; SOM)                                                                                                                       |
| Notched                         |                                   | One or more distinct recesses or indentations along the edge (Whittaker 1994, pp. 129). Only considered if they are complex due to the potential of notching through taphonomic processes (Scerri et al. 2014; SOM). |
| Shouldering                     |                                   | Retouch creates a pronounced “shoulder” between edge and base; often to stabilize hafting (Scerri et al. 2014; SOM)                                                                                                  |
| Truncation                      |                                   | Edge intentionally cut off or flattened to create a straight or shortened end (Scerri et al. 2014; SOM).                                                                                                             |
| Burination                      |                                   | A technique in which a flake or blade is struck along its edge (often the distal end) to produce a chisel-like                                                                                                       |

|  |  |                                                                                       |
|--|--|---------------------------------------------------------------------------------------|
|  |  | tool, characterized by a narrow, steep, burin spall removal (Whittaker 1994, pp 118). |
|--|--|---------------------------------------------------------------------------------------|

### Supplementary Tables

Supplementary Table S1. Results from the iterations of the latent class models, from 1-6 latent classes.

| Latent classes | log-likelihood | resid. df | BIC      | aBIC     | cAIC     | likelihood-ratio | Entropy | Relative entropy |
|----------------|----------------|-----------|----------|----------|----------|------------------|---------|------------------|
| 1              | 13219.64       | 1283.00   | 26806.27 | 26644.27 | 26857.27 | 7837.82          | 10.01   | NA               |
| 2              | 12809.06       | 1231.00   | 26359.30 | 26032.12 | 26462.30 | 7060.98          | 9.71    | 0.67             |
| 3              | 12636.49       | 1179.00   | 26388.35 | 25895.98 | 26543.35 | 6731.86          | 9.58    | 0.72             |
| 4              | 12517.43       | 1127.00   | 26524.41 | 25866.86 | 26731.41 | 6504.66          | 9.49    | 0.74             |
| 5              | -12411.88      | 1075.00   | 26687.52 | 25864.79 | 26946.52 | 6303.21          | 9.41    | 0.77             |
| 6              | 12330.28       | 1023.00   | 26898.49 | 25910.59 | 27209.49 | 6143.16          | 9.34    | 0.77             |

Supplementary Table S2. Conditional item response (column) probabilities for tool laminarity ( $X_1$ ) by outcome variable, for each class (row). See Table 2 for description of categories.

|          | 1    | 2    | 3    | 4    | 5    | 6    | 7    |
|----------|------|------|------|------|------|------|------|
| class 1: | 0.00 | 0.04 | 0.15 | 0.24 | 0.25 | 0.18 | 0.14 |
| class 2: | 0.00 | 0.03 | 0.28 | 0.37 | 0.22 | 0.09 | 0.01 |
| class 3: | 0.00 | 0.04 | 0.15 | 0.24 | 0.25 | 0.18 | 0.14 |
| class 4: | 0.00 | 0.06 | 0.22 | 0.34 | 0.24 | 0.10 | 0.05 |
| class 5: | 0.03 | 0.24 | 0.28 | 0.14 | 0.19 | 0.00 | 0.12 |

Supplementary Table S3. Conditional item response (column) probabilities for tool vertical convexity ( $X_2$ ) by outcome variable, for each class (row). See Table 2 for description of categories.

|          | 1    | 2    | 3    | 4    | 5    | 6    | 7    |
|----------|------|------|------|------|------|------|------|
| class 1: | 0.00 | 0.10 | 0.25 | 0.39 | 0.23 | 0.03 | 0.00 |
| class 2: | 0.15 | 0.24 | 0.29 | 0.22 | 0.07 | 0.02 | 0.01 |
| class 3: | 0.14 | 0.29 | 0.39 | 0.17 | 0.00 | 0.00 | 0.00 |
| class 4: | 0.05 | 0.18 | 0.23 | 0.16 | 0.23 | 0.15 | 0.00 |
| class 5: | 0.02 | 0.03 | 0.17 | 0.34 | 0.25 | 0.13 | 0.05 |

Supplementary Table S4. Conditional item response (column) probabilities for lateral edge type ( $X_3$ ) by outcome variable, for each class (row)

|          | 1    | 2    | 3    | 4    |
|----------|------|------|------|------|
| class 1: | 0.87 | 0.09 | 0.00 | 0.04 |
| class 2: | 0.49 | 0.47 | 0.01 | 0.03 |
| class 3: | 0.43 | 0.13 | 0.14 | 0.31 |

|          |      |      |      |      |
|----------|------|------|------|------|
| class 4: | 0.34 | 0.17 | 0.10 | 0.38 |
| class 5: | 0.16 | 0.29 | 0.40 | 0.15 |

Supplementary Table S5. Conditional item response (column) probabilities for distal terminus ( $X_4$ ) by outcome variable, for each class (row)

|          | <b>1</b> | <b>2</b> | <b>3</b> | <b>4</b> | <b>5</b> | <b>6</b> |
|----------|----------|----------|----------|----------|----------|----------|
| class 1: | 0.83     | 0.07     | 0.06     | 0.00     | 0.02     | 0.02     |
| class 2: | 0.79     | 0.05     | 0.15     | 0.00     | 0.00     | 0        |
| class 3: | 0.41     | 0.00     | 0.51     | 0.00     | 0.06     | 0.01     |
| class 4: | 0.41     | 0.26     | 0.32     | 0.00     | 0.02     | 0        |
| class 5: | 0.41     | 0.00     | 0.53     | 0.01     | 0.03     | 0.02     |

Supplementary Table S6. Conditional item response (column) probabilities for profile ( $X_5$ ) by outcome variable, for each class (row).

|          | <b>1</b> | <b>2</b> | <b>3</b> | <b>4</b> |
|----------|----------|----------|----------|----------|
| class 1: | 0.66     | 0.30     | 0.03     | 0.01     |
| class 2: | 0.98     | 0.01     | 0.00     | 0.01     |
| class 3: | 0.74     | 0.23     | 0.02     | 0.01     |
| class 4: | 0.57     | 0.34     | 0.09     | 0.00     |
| class 5: | 0.74     | 0.22     | 0.03     | 0.01     |

Supplementary Table S7. Conditional item response (column) probabilities for application of unique retouch ( $X_6$ ) by outcome variable, for each class (row)

|          | <b>1</b> | <b>2</b> | <b>3</b> | <b>4</b> | <b>5</b> | <b>6</b> | <b>7</b> | <b>8</b> | <b>9</b> | <b>10</b> |
|----------|----------|----------|----------|----------|----------|----------|----------|----------|----------|-----------|
| class 1: | 0.08     | 0.01     | 0.02     | 0.57     | 0.01     | 0.09     | 0.15     | 0.03     | 0.05     | 0.00      |
| class 2: | 0.00     | 0.00     | 0.03     | 0.00     | 0.00     | 0.15     | 0.00     | 0.00     | 0.82     | 0.00      |
| class 3: | 0.43     | 0.01     | 0.04     | 0.33     | 0.04     | 0.10     | 0.01     | 0.04     | 0.01     | 0.00      |
| class 4: | 0.37     | 0.00     | 0.00     | 0.12     | 0.00     | 0.05     | 0.08     | 0.00     | 0.00     | 0.38      |
| class 5: | 0.27     | 0.03     | 0.03     | 0.41     | 0.08     | 0.08     | 0.06     | 0.03     | 0.02     | 0.00      |

Supplementary Table S8. Conditional item response (column) probabilities for active edge retouch type ( $X_7$ ) by outcome variable, for each class (row)

Supplementary Table S9. Conditional item response (column) probabilities for inactive edge retouch type ( $X_8$ ) by outcome variable, for each class (row)

|          | 1    | 2    | 3    | 4    | 5    | 6    | 7    | 8    |
|----------|------|------|------|------|------|------|------|------|
| class 1: | 0.10 | 0.02 | 0.35 | 0.00 | 0.03 | 0.01 | 0.00 | 0.48 |
| class 2: | 0.29 | 0.00 | 0.25 | 0.00 | 0.02 | 0.02 | 0.00 | 0.42 |
| class 3: | 0.01 | 0.00 | 0.12 | 0.00 | 0.00 | 0.04 | 0.00 | 0.83 |
| class 4: | 0.00 | 0.05 | 0.05 | 0.00 | 0.00 | 0.00 | 0.02 | 0.88 |
| class 5: | 0.01 | 0.00 | 0.06 | 0.00 | 0.01 | 0.02 | 0.00 | 0.90 |

Supplementary Table S10. Variance of conditional item response probabilities for each manifest variable state and average variance across variable states.

|       | 1     | 2     | 3     | 4     | 5     | 6     | 7     | 8     | 9     | 10    | 11    | 12    | mean  |
|-------|-------|-------|-------|-------|-------|-------|-------|-------|-------|-------|-------|-------|-------|
| $X_1$ | 0.010 | 0.020 | 0.000 | 0.010 | 0.010 | 0.000 | 0.000 | -     | -     | -     | -     | -     | 0.010 |
| $X_2$ | 0.004 | 0.009 | 0.005 | 0.009 | 0.010 | 0.004 | 0.000 | -     | -     | -     | -     | -     | 0.006 |
| $X_3$ | 0.055 | 0.019 | 0.021 | 0.020 | -     | -     | -     | -     | -     | -     | -     | -     | 0.029 |
| $X_4$ | 0.039 | 0.009 | 0.035 | 0.000 | 0.000 | 0.000 | -     | -     | -     | -     | -     | -     | 0.014 |
| $X_5$ | 0.019 | 0.013 | 0.001 | 0.000 | -     | -     | -     | -     | -     | -     | -     | -     | 0.008 |
| $X_6$ | 0.027 | 0.000 | 0.000 | 0.041 | 0.001 | 0.001 | 0.003 | 0.000 | 0.103 | 0.023 | -     | -     | 0.020 |
| $X_7$ | 0.006 | 0.156 | 0.000 | 0.000 | 0.002 | 0.010 | 0.000 | 0.000 | 0.000 | 0.000 | 0.027 | 0.042 | 0.020 |
| $X_8$ | 0.012 | 0.000 | 0.014 | 0.000 | 0.000 | 0.000 | 0.000 | 0.043 | -     | -     | -     | -     | 0.009 |

Supplementary Table S11. Posterior probabilities for each artefact falling into the five latent classes, with final latent class assignment (C). Information of type and subtypes (when available) from the dataset utilised from Scerri et al. (2014) is also reported.

|             | 1                                                                                     | 2    | 3    | 4    | 5               | 6                                | 7        | 8                              | 9    | 10   | 11   | 12   |                                                |
|-------------|---------------------------------------------------------------------------------------|------|------|------|-----------------|----------------------------------|----------|--------------------------------|------|------|------|------|------------------------------------------------|
| class 1:    | 0.09                                                                                  | 0.91 | 0.00 | 0.00 | 0.01            | 0.00                             | 0.00     | 0.00                           | 0.00 | 0.00 | 0.00 | 0.00 | 0.00                                           |
| class 2:    | 0.00                                                                                  | 0.99 | 0.00 | 0.00 | 0.00            | 0.00                             | 0.01     | 0.00                           | 0.00 | 0.00 | 0.00 | 0.00 | 0.00                                           |
| class 3:    | 0.18                                                                                  | 0.75 | 0.00 | 0.00 | 0.07            | 0.00                             | 0.00     | 0.00                           | 0.00 | 0.00 | 0.00 | 0.00 | 0.00                                           |
| class 4:    | 0.00                                                                                  | 0.00 | 0.00 | 0.00 | 0.00            | 0.22                             | 0.00     | 0.00                           | 0.00 | 0.00 | 0.37 | 0.41 |                                                |
| class 5:    | 0.11                                                                                  | 0.77 | 0.02 | 0.00 | 0.09            | 0.00                             | 0.00     | 0.01                           | 0.00 | 0.00 | 0.01 | 0.00 | 0.00                                           |
| <b>Site</b> | <b>Artefact number and relevant comments for subtypes (Scerri et al. 2014).</b>       |      |      |      |                 | <b>Type (Scerri et al. 2014)</b> | <b>C</b> | <b>Posterior probabilities</b> |      |      |      |      | <b>Simpson's Diversity index of posteriors</b> |
|             |                                                                                       |      |      |      |                 |                                  |          | 1                              | 2    | 3    | 4    | 5    |                                                |
| BT-14       | 17/D, marked as A and E99D14. See Wendorf and Schild 1992 p. 276 fig 21.10d (Chopper) |      |      |      | Core tool       |                                  | 4        | 0.00                           | 1.00 | 0.00 | 0.00 | 0.00 | 0.00                                           |
| BT-14       | K6/15 marked as denticulate                                                           |      |      |      | Retouched Flake | 5                                | 0.00     | 0.00                           | 0.00 | 0.00 | 0.00 | 1.00 | 0.00                                           |

|        |                                                                                                                                |                     |   |      |      |      |      |      |      |
|--------|--------------------------------------------------------------------------------------------------------------------------------|---------------------|---|------|------|------|------|------|------|
| BT-14  | K5/4 marked as<br>transverse side-scraper                                                                                      | Retouched<br>Flake  | 5 | 0.00 | 0.00 | 0.00 | 0.00 | 1.00 | 0.00 |
| BT-14  | K5/4, listed in W&S<br>1980 p.71 fig 2.54c as<br>a convergent side<br>scraper on Levallois,<br>but too thin to be a<br>scraper | Retouched<br>Point  | 5 | 0.00 | 0.00 | 0.00 | 0.34 | 0.66 | 0.45 |
| BT-14  | K5/24                                                                                                                          | Retouched<br>Flake  | 5 | 0.00 | 0.00 | 0.00 | 0.09 | 0.91 | 0.16 |
| BT-14  | *                                                                                                                              | Biface              | 2 | 0.50 | 0.00 | 0.02 | 0.00 | 0.48 | 0.52 |
| BT-14  | K7/10,<br>small convergent side<br>scraper                                                                                     | Retouched<br>Flake  | 5 | 0.00 | 0.00 | 0.28 | 0.16 | 0.57 | 0.57 |
| BT-14  | K5/16, Mousterian<br>Point                                                                                                     | Retouched<br>Point  | 1 | 0.00 | 0.00 | 0.24 | 0.66 | 0.10 | 0.50 |
| BT-14  | E20                                                                                                                            | Retouched<br>Flake  | 5 | 0.00 | 0.00 | 0.04 | 0.00 | 0.96 | 0.08 |
| BT-14  | K6/18, Convergent<br>Side Scraper                                                                                              | Retouched<br>Flake  | 5 | 0.01 | 0.00 | 0.11 | 0.02 | 0.86 | 0.25 |
| BT-14  | J5/4, cf. Wendorf and<br>Schild 1992, page 286<br>fig 21.16d                                                                   | Retouched<br>Flake  | 3 | 0.00 | 0.00 | 0.92 | 0.07 | 0.01 | 0.15 |
| BT-14  | K6/22                                                                                                                          | Retouched<br>Flake  | 1 | 0.00 | 0.00 | 0.00 | 0.97 | 0.03 | 0.06 |
| BT-14  | K6/11                                                                                                                          | Retouched<br>Point  | 1 | 0.00 | 0.00 | 0.01 | 0.98 | 0.01 | 0.04 |
| BT-14  | K6/18                                                                                                                          | Retouched<br>Point  | 1 | 0.00 | 0.00 | 0.00 | 0.81 | 0.19 | 0.31 |
| BT-14  | K6/20, Convergent<br>Side Scraper                                                                                              | Retouched<br>Flake  | 5 | 0.00 | 0.00 | 0.00 | 0.25 | 0.75 | 0.38 |
| BT-14  | K4/23                                                                                                                          | Retouched<br>Point  | 1 | 0.00 | 0.00 | 0.01 | 0.99 | 0.00 | 0.02 |
| BT-14  | Area N Surface,<br>Surface Bifacial<br>Foliate see W&S1993<br>p.336                                                            | Bifacial<br>Foliate | 2 | 1.00 | 0.00 | 0.00 | 0.00 | 0.00 | 0.00 |
| BT-14  | Trench 7, Lower grey<br>silt 'Aterian bifacial<br>foliate', see W&S<br>1980: 79 fig 2.62A                                      | Bifacial<br>Foliate | 2 | 1.00 | 0.00 | 0.00 | 0.00 | 0.00 | 0.00 |
| BT-14  | K6-21, Transverse<br>Side-scraper                                                                                              | Retouched<br>Flake  | 5 | 0.00 | 0.00 | 0.00 | 0.00 | 1.00 | 0.00 |
| BT-14  | L6/1                                                                                                                           | Retouched<br>Flake  | 3 | 0.00 | 0.00 | 0.62 | 0.01 | 0.37 | 0.48 |
| BT-14  | J6/18                                                                                                                          | Retouched<br>Point  | 5 | 0.00 | 0.00 | 0.00 | 0.00 | 1.00 | 0.00 |
| BT-14  | Unmarked, Retouched<br>chunk                                                                                                   | Retouched<br>Flake  | 5 | 0.00 | 0.00 | 0.00 | 0.00 | 1.00 | 0.00 |
| BT-14  | unmarked                                                                                                                       | Retouched<br>Flake  | 5 | 0.00 | 0.37 | 0.00 | 0.00 | 0.63 | 0.47 |
| 1010-8 | 8a-383, of scraper<br>type.                                                                                                    | Retouched<br>Point  | 3 | 0.00 | 0.00 | 0.84 | 0.11 | 0.05 | 0.28 |

|        |                            |                    |   |      |      |      |      |      |      |
|--------|----------------------------|--------------------|---|------|------|------|------|------|------|
| 1010-8 | 8a-323                     | Retouched<br>Flake | 3 | 0.00 | 0.00 | 0.53 | 0.00 | 0.47 | 0.50 |
| 1010-8 | *                          | Retouched<br>Flake | 5 | 0.00 | 0.00 | 0.00 | 0.00 | 1.00 | 0.00 |
| 1010-8 | 8A-386, of scraper<br>type | Retouched<br>Flake | 5 | 0.00 | 0.00 | 0.00 | 0.00 | 1.00 | 0.00 |
| 1010-8 | *                          | Retouched<br>Flake | 5 | 0.00 | 0.00 | 0.05 | 0.00 | 0.95 | 0.10 |
| 1010-8 | *                          | Retouched<br>Flake | 3 | 0.00 | 0.00 | 0.98 | 0.00 | 0.02 | 0.04 |
| 1010-8 | *                          | Retouched<br>Flake | 3 | 0.00 | 0.00 | 0.94 | 0.01 | 0.06 | 0.11 |
| 1010-8 | *                          | Retouched<br>Flake | 5 | 0.00 | 0.00 | 0.05 | 0.00 | 0.95 | 0.10 |
| 1010-8 | *                          | Debordant<br>Flake | 3 | 0.00 | 0.00 | 0.97 | 0.00 | 0.03 | 0.06 |
| 1010-8 | 363                        | Retouched<br>Flake | 3 | 0.00 | 0.00 | 0.90 | 0.00 | 0.10 | 0.18 |
| 1010-8 | 8b-340                     | Retouched<br>Flake | 5 | 0.00 | 0.00 | 0.04 | 0.00 | 0.95 | 0.10 |
| 1010-8 | *                          | Retouched<br>Flake | 5 | 0.00 | 0.00 | 0.00 | 0.00 | 1.00 | 0.00 |
| 1010-8 | *                          | Retouched<br>Flake | 5 | 0.00 | 0.00 | 0.00 | 0.00 | 1.00 | 0.00 |
| 1010-8 | *                          | Retouched<br>Flake | 5 | 0.00 | 0.00 | 0.00 | 0.00 | 1.00 | 0.00 |
| 1010-8 | 8a-365                     | Retouched<br>Flake | 5 | 0.00 | 0.00 | 0.00 | 0.00 | 1.00 | 0.00 |
| 1010-8 | *                          | Retouched<br>Flake | 5 | 0.00 | 0.00 | 0.00 | 0.00 | 1.00 | 0.00 |
| 1010-8 | *                          | Retouched<br>Flake | 5 | 0.00 | 0.00 | 0.35 | 0.00 | 0.65 | 0.46 |
| 1010-8 | 8-331                      | Retouched<br>Flake | 5 | 0.00 | 0.00 | 0.28 | 0.00 | 0.72 | 0.40 |
| 1010-8 | *                          | Debordant<br>Flake | 3 | 0.00 | 0.00 | 1.00 | 0.00 | 0.00 | 0.00 |
| 1010-8 | 8a-346                     | Retouched<br>Flake | 3 | 0.00 | 0.00 | 0.91 | 0.00 | 0.09 | 0.16 |
| 1010-8 | 8-387                      | Retouched<br>Flake | 5 | 0.00 | 0.00 | 0.04 | 0.00 | 0.96 | 0.08 |
| 1010-8 | 8a-333                     | Retouched<br>Flake | 5 | 0.00 | 0.00 | 0.00 | 0.00 | 1.00 | 0.00 |
| 1010-8 | 348                        | Retouched<br>Flake | 3 | 0.00 | 0.00 | 0.64 | 0.01 | 0.35 | 0.47 |
| 1010-8 | *                          | Retouched<br>Flake | 5 | 0.00 | 0.00 | 0.08 | 0.04 | 0.88 | 0.22 |
| 1010-8 | *                          | Debordant<br>Flake | 3 | 0.00 | 0.00 | 0.99 | 0.00 | 0.01 | 0.02 |
| 1010-8 | 313                        | Retouched<br>Flake | 5 | 0.00 | 0.00 | 0.10 | 0.00 | 0.90 | 0.18 |
| 1010-8 | *                          | Retouched<br>Flake | 5 | 0.00 | 0.00 | 0.00 | 0.00 | 1.00 | 0.00 |
| 1010-8 | 369                        | Retouched<br>Flake | 3 | 0.00 | 0.00 | 0.92 | 0.02 | 0.06 | 0.15 |

|        |     |                    |   |      |      |      |      |      |      |
|--------|-----|--------------------|---|------|------|------|------|------|------|
| 1010-8 | 320 | Retouched<br>Flake | 3 | 0.00 | 0.00 | 0.75 | 0.00 | 0.25 | 0.38 |
| 1010-8 | 311 | Retouched<br>Flake | 3 | 0.00 | 0.00 | 0.98 | 0.00 | 0.02 | 0.04 |
| 1010-8 | 356 | Retouched<br>Flake | 3 | 0.00 | 0.00 | 0.85 | 0.00 | 0.15 | 0.26 |
| 1010-8 | 310 | Retouched<br>Flake | 3 | 0.00 | 0.00 | 0.60 | 0.14 | 0.27 | 0.55 |
| 1010-8 | 372 | Retouched<br>Flake | 5 | 0.00 | 0.00 | 0.00 | 0.00 | 1.00 | 0.00 |
| 1010-8 | 318 | Retouched<br>Flake | 5 | 0.09 | 0.00 | 0.20 | 0.00 | 0.71 | 0.45 |
| 1010-8 | 379 | Retouched<br>Flake | 5 | 0.00 | 0.00 | 0.00 | 0.00 | 1.00 | 0.00 |
| 1010-8 | *   | Retouched<br>Flake | 5 | 0.00 | 0.00 | 0.00 | 0.00 | 1.00 | 0.00 |
| 1010-8 | 352 | Retouched<br>Flake | 5 | 0.00 | 0.00 | 0.00 | 0.00 | 1.00 | 0.00 |
| 1010-8 | 328 | Retouched<br>Flake | 5 | 0.00 | 0.00 | 0.00 | 0.00 | 1.00 | 0.00 |
| 1010-8 | 330 | Debordant<br>Flake | 3 | 0.00 | 0.00 | 0.98 | 0.00 | 0.02 | 0.04 |
| 1010-8 | *   | Retouched<br>Flake | 5 | 0.00 | 0.00 | 0.00 | 0.00 | 1.00 | 0.00 |
| 1010-8 | *   | Retouched<br>Flake | 5 | 0.00 | 0.00 | 0.00 | 0.00 | 1.00 | 0.00 |
| 1010-8 | 314 | Retouched<br>Flake | 3 | 0.00 | 0.00 | 0.79 | 0.00 | 0.21 | 0.33 |
| 1010-8 | *   | Retouched<br>Flake | 3 | 0.00 | 0.00 | 0.91 | 0.00 | 0.09 | 0.16 |
| 1010-8 | *   | Debordant<br>Flake | 3 | 0.00 | 0.00 | 0.94 | 0.05 | 0.01 | 0.11 |
| 1010-8 | *   | Retouched<br>Flake | 5 | 0.00 | 0.00 | 0.00 | 0.00 | 1.00 | 0.00 |
| 1010-8 | *   | Retouched<br>Flake | 3 | 0.00 | 0.00 | 0.84 | 0.00 | 0.16 | 0.27 |
| 1010-8 | *   | Retouched<br>Flake | 5 | 0.00 | 0.00 | 0.24 | 0.00 | 0.76 | 0.36 |
| 1010-8 | *   | Retouched<br>Flake | 3 | 0.00 | 0.00 | 0.89 | 0.01 | 0.10 | 0.20 |
| 1010-8 | *   | Retouched<br>Flake | 3 | 0.00 | 0.00 | 0.97 | 0.01 | 0.02 | 0.06 |
| 1010-8 | *   | Retouched<br>Flake | 5 | 0.00 | 0.00 | 0.44 | 0.00 | 0.56 | 0.49 |
| 1010-8 | *   | Retouched<br>Flake | 5 | 0.00 | 0.00 | 0.00 | 0.00 | 1.00 | 0.00 |
| 1010-8 | *   | Retouched<br>Flake | 3 | 0.00 | 0.00 | 0.94 | 0.01 | 0.06 | 0.11 |
| 1010-8 | *   | Retouched<br>Flake | 5 | 0.00 | 0.00 | 0.04 | 0.00 | 0.96 | 0.08 |
| 1010-8 | *   | Retouched<br>Flake | 5 | 0.00 | 0.00 | 0.10 | 0.00 | 0.90 | 0.18 |
| 1010-8 | *   | Retouched<br>Flake | 3 | 0.00 | 0.00 | 0.58 | 0.00 | 0.42 | 0.49 |

|        |                                                                                           |                    |   |      |      |      |      |      |      |
|--------|-------------------------------------------------------------------------------------------|--------------------|---|------|------|------|------|------|------|
| 1010-8 | *                                                                                         | Debordant<br>Flake | 3 | 0.00 | 0.00 | 0.99 | 0.00 | 0.01 | 0.02 |
| 1010-8 | *                                                                                         | Denticulate        | 3 | 0.00 | 0.00 | 0.99 | 0.00 | 0.00 | 0.02 |
| 1010-8 | *                                                                                         | Retouched<br>Flake | 3 | 0.00 | 0.00 | 0.82 | 0.15 | 0.04 | 0.30 |
| 1010-8 | *                                                                                         | Retouched<br>Flake | 5 | 0.00 | 0.00 | 0.00 | 0.00 | 1.00 | 0.00 |
| 1010-8 | *                                                                                         | Retouched<br>Flake | 3 | 0.01 | 0.00 | 0.73 | 0.00 | 0.26 | 0.40 |
| 1010-8 | *                                                                                         | Levallois<br>Flake | 4 | 0.00 | 1.00 | 0.00 | 0.00 | 0.00 | 0.00 |
| 1010-8 | *                                                                                         | Levallois<br>Point | 1 | 0.09 | 0.00 | 0.00 | 0.51 | 0.40 | 0.57 |
| 1010-8 | *                                                                                         | Retouched<br>Point | 3 | 0.00 | 0.00 | 0.59 | 0.03 | 0.38 | 0.51 |
| 1010-8 | *                                                                                         | Retouched<br>Flake | 5 | 0.00 | 0.00 | 0.00 | 0.00 | 1.00 | 0.00 |
| 1010-8 | *                                                                                         | Retouched<br>Flake | 5 | 0.00 | 0.00 | 0.00 | 0.00 | 1.00 | 0.00 |
| 1010-8 | * Bag 8: described in<br>text as either borer or<br>nosed scraper. Figure<br>14g page 219 | Retouched<br>Point | 5 | 0.00 | 0.00 | 0.00 | 0.00 | 1.00 | 0.00 |
| 1010-8 | *                                                                                         | Retouched<br>Flake | 3 | 0.00 | 0.00 | 0.63 | 0.00 | 0.37 | 0.47 |
| 1010-8 | *                                                                                         | Retouched<br>Flake | 5 | 0.00 | 0.00 | 0.00 | 0.00 | 1.00 | 0.00 |
| 1010-8 | *                                                                                         | Retouched<br>Flake | 5 | 0.00 | 0.00 | 0.00 | 0.00 | 1.00 | 0.00 |
| 1010-8 | * Bag 8: 'borer' in fig<br>14d page 219                                                   | Retouched<br>Flake | 5 | 0.00 | 0.00 | 0.11 | 0.00 | 0.89 | 0.20 |
| 1010-8 | *                                                                                         | Retouched<br>Flake | 4 | 0.00 | 1.00 | 0.00 | 0.00 | 0.00 | 0.00 |
| 1010-8 | *                                                                                         | Retouched<br>Flake | 5 | 0.00 | 0.00 | 0.00 | 0.03 | 0.97 | 0.06 |
| 1010-8 | *                                                                                         | Retouched<br>Flake | 5 | 0.00 | 0.00 | 0.02 | 0.00 | 0.98 | 0.04 |
| 1010-8 | *                                                                                         | Retouched<br>Flake | 3 | 0.00 | 0.00 | 0.84 | 0.00 | 0.16 | 0.27 |
| 1010-8 | *                                                                                         | Retouched<br>Flake | 5 | 0.00 | 0.00 | 0.00 | 0.00 | 1.00 | 0.00 |
| 1010-8 | *                                                                                         | Retouched<br>Flake | 5 | 0.00 | 0.00 | 0.00 | 0.00 | 1.00 | 0.00 |
| 1010-8 | *                                                                                         | Retouched<br>Flake | 5 | 0.00 | 0.00 | 0.01 | 0.00 | 0.99 | 0.02 |
| 1010-8 | *                                                                                         | Retouched<br>Flake | 3 | 0.00 | 0.00 | 0.99 | 0.00 | 0.01 | 0.02 |
| 1010-8 | *                                                                                         | Retouched<br>Flake | 5 | 0.00 | 0.00 | 0.00 | 0.01 | 0.99 | 0.02 |
| 1010-8 | *                                                                                         | Retouched<br>Flake | 5 | 0.00 | 0.00 | 0.41 | 0.07 | 0.52 | 0.56 |
| 1010-8 | *                                                                                         | Retouched<br>Flake | 5 | 0.00 | 0.00 | 0.32 | 0.00 | 0.68 | 0.44 |

|         |                                                 |                    |   |      |      |      |      |      |      |
|---------|-------------------------------------------------|--------------------|---|------|------|------|------|------|------|
| 1010-8  | *                                               | Retouched<br>Flake | 5 | 0.00 | 0.00 | 0.00 | 0.00 | 1.00 | 0.00 |
| 1010-8  | *                                               | Retouched<br>Flake | 5 | 0.00 | 0.00 | 0.24 | 0.00 | 0.76 | 0.36 |
| 1010-8  | *                                               | Retouched<br>Flake | 3 | 0.00 | 0.00 | 0.94 | 0.01 | 0.06 | 0.11 |
| 1010-8  | *                                               | Retouched<br>Flake | 5 | 0.00 | 0.00 | 0.25 | 0.00 | 0.75 | 0.38 |
| 1010-8  | *                                               | Retouched<br>Flake | 5 | 0.00 | 0.00 | 0.00 | 0.00 | 1.00 | 0.00 |
| 1010-8  | *                                               | Retouched<br>Flake | 3 | 0.00 | 0.00 | 0.99 | 0.00 | 0.01 | 0.02 |
| 1010-8  | *                                               | Blade              | 3 | 0.00 | 0.00 | 1.00 | 0.00 | 0.00 | 0.00 |
| 1010-8  | *                                               | Retouched<br>Flake | 1 | 0.01 | 0.00 | 0.14 | 0.84 | 0.01 | 0.27 |
| 1010-8  | *                                               | Retouched<br>Flake | 5 | 0.00 | 0.00 | 0.18 | 0.02 | 0.80 | 0.33 |
| 1010-8  | *                                               | Retouched<br>Flake | 5 | 0.00 | 0.00 | 0.00 | 0.02 | 0.98 | 0.04 |
| 1010-8  | *                                               | Retouched<br>Flake | 5 | 0.00 | 0.00 | 0.00 | 0.00 | 1.00 | 0.00 |
| 1010-8  | *                                               | Retouched<br>Flake | 5 | 0.00 | 0.00 | 0.00 | 0.00 | 1.00 | 0.00 |
| 1010-8  | *                                               | Retouched<br>Blade | 3 | 0.00 | 0.00 | 0.97 | 0.03 | 0.01 | 0.06 |
| 1010-8  | *                                               | Retouched<br>Flake | 5 | 0.00 | 0.00 | 0.02 | 0.00 | 0.98 | 0.04 |
| 1010-8  | *                                               | Retouched<br>Flake | 3 | 0.00 | 0.00 | 0.97 | 0.01 | 0.02 | 0.06 |
| 1010-8  | *                                               | Retouched<br>Flake | 3 | 0.00 | 0.00 | 0.79 | 0.04 | 0.17 | 0.35 |
| 1010-8  | *                                               | Retouched<br>Flake | 3 | 0.00 | 0.00 | 0.75 | 0.24 | 0.02 | 0.38 |
| 1010-8  | *                                               | Retouched<br>Point | 3 | 0.00 | 0.00 | 0.83 | 0.15 | 0.02 | 0.29 |
| 1010-8  | *                                               | Retouched<br>Flake | 5 | 0.00 | 0.00 | 0.00 | 0.00 | 1.00 | 0.00 |
| 1010-8  | *                                               | Retouched<br>Flake | 5 | 0.00 | 0.00 | 0.00 | 0.00 | 1.00 | 0.00 |
| 1010-8  | *                                               | Retouched<br>Flake | 5 | 0.00 | 0.00 | 0.49 | 0.01 | 0.50 | 0.51 |
| E-78-11 | * Illustrated Fig 11.1b<br>Side Scraper         | Retouched<br>Flake | 5 | 0.00 | 0.00 | 0.00 | 0.00 | 1.00 | 0.00 |
| E-78-11 | * Illustrated Figure<br>11.1f Side Scraper      | Retouched<br>Flake | 4 | 0.00 | 0.96 | 0.00 | 0.00 | 0.04 | 0.08 |
| E-78-11 | * Illustrated Figure<br>11.1g Tanged Point      | Levallois<br>Point | 1 | 0.07 | 0.00 | 0.00 | 0.92 | 0.00 | 0.15 |
| E-78-11 | * Apparently a burin<br>according to the label. | Retouched<br>Flake | 4 | 0.00 | 1.00 | 0.00 | 0.00 | 0.00 | 0.00 |
| E-78-11 | * Illustrated Figure<br>11.1a Side Scraper      | Retouched<br>Flake | 5 | 0.00 | 0.00 | 0.00 | 0.00 | 1.00 | 0.00 |
| E-78-11 | * Illustrated Figure<br>11.1h 'Double side      | Core tool          | 3 | 0.00 | 0.00 | 0.55 | 0.02 | 0.44 | 0.50 |

scraper'. It's worked  
bifacially though could  
be a half done foliate.  
Also has cortex on  
both sides: worked  
pebble?

|         |                            |                    |   |      |      |      |      |      |      |
|---------|----------------------------|--------------------|---|------|------|------|------|------|------|
| E-78-11 | * Listed as End<br>Scraper | Retouched<br>Point | 1 | 0.00 | 0.00 | 0.00 | 0.81 | 0.19 | 0.31 |
| 1033    | *                          | Retouched<br>Flake | 5 | 0.00 | 0.00 | 0.00 | 0.00 | 1.00 | 0.00 |
| 1033    | *                          | Retouched<br>Flake | 3 | 0.00 | 0.00 | 0.92 | 0.00 | 0.08 | 0.15 |
| 1033    | *                          | Retouched<br>Flake | 5 | 0.00 | 0.00 | 0.02 | 0.00 | 0.98 | 0.04 |
| 1033    | *                          | Retouched<br>Flake | 5 | 0.00 | 0.00 | 0.13 | 0.00 | 0.87 | 0.23 |
| 1033    | *                          | Retouched<br>Point | 3 | 0.00 | 0.00 | 0.99 | 0.00 | 0.01 | 0.02 |
| 1033    | *                          | Retouched<br>Flake | 5 | 0.00 | 0.00 | 0.04 | 0.00 | 0.96 | 0.08 |
| 1033    | *                          | Retouched<br>Flake | 5 | 0.00 | 0.00 | 0.38 | 0.00 | 0.62 | 0.47 |
| 1033    | *                          | Retouched<br>Flake | 5 | 0.00 | 0.00 | 0.00 | 0.00 | 1.00 | 0.00 |
| 1033    | *                          | Retouched<br>Flake | 5 | 0.00 | 0.00 | 0.18 | 0.00 | 0.82 | 0.30 |
| 1033    | *                          | Retouched<br>Flake | 3 | 0.01 | 0.00 | 0.94 | 0.00 | 0.06 | 0.11 |
| 1033    | *                          | Retouched<br>Flake | 5 | 0.00 | 0.00 | 0.02 | 0.00 | 0.98 | 0.04 |
| 1033    | *                          | Retouched<br>Flake | 3 | 0.00 | 0.00 | 0.62 | 0.00 | 0.38 | 0.47 |
| 1033    | *                          | Retouched<br>Flake | 3 | 0.00 | 0.00 | 0.90 | 0.10 | 0.00 | 0.18 |
| 1033    | *                          | Retouched<br>Flake | 5 | 0.00 | 0.00 | 0.03 | 0.00 | 0.97 | 0.06 |
| 1033    | *                          | Retouched<br>Flake | 3 | 0.00 | 0.00 | 0.62 | 0.01 | 0.37 | 0.48 |
| 1033    | *                          | Retouched<br>Flake | 5 | 0.00 | 0.00 | 0.02 | 0.00 | 0.98 | 0.04 |
| 1033    | *                          | Retouched<br>Flake | 5 | 0.00 | 0.00 | 0.03 | 0.00 | 0.97 | 0.06 |
| 1033    | *                          | Retouched<br>Point | 4 | 0.00 | 0.88 | 0.00 | 0.00 | 0.12 | 0.21 |
| 1033    | *                          | Retouched<br>Flake | 5 | 0.00 | 0.00 | 0.01 | 0.00 | 0.99 | 0.02 |
| 1033    | *                          | Retouched<br>Flake | 3 | 0.00 | 0.00 | 0.57 | 0.11 | 0.32 | 0.56 |
| 1033    | *                          | Retouched<br>Flake | 1 | 0.00 | 0.00 | 0.24 | 0.66 | 0.10 | 0.50 |
| 1033    | *                          | Retouched<br>Flake | 5 | 0.00 | 0.00 | 0.00 | 0.00 | 1.00 | 0.00 |
| 1033    | *                          | Retouched<br>Flake | 5 | 0.00 | 0.00 | 0.00 | 0.00 | 1.00 | 0.00 |

|      |                                                                                                                                   |                    |   |      |      |      |      |      |      |
|------|-----------------------------------------------------------------------------------------------------------------------------------|--------------------|---|------|------|------|------|------|------|
| 1033 | *                                                                                                                                 | Retouched<br>Flake | 3 | 0.00 | 0.00 | 0.68 | 0.00 | 0.32 | 0.44 |
| 1033 | * Bag 17: core<br>management piece<br>with 3 facets: one<br>cortical, one bearing a<br>flake scar and one<br>apparently retouched | Debordant<br>Flake | 3 | 0.00 | 0.00 | 0.96 | 0.00 | 0.04 | 0.08 |
| 1033 | *                                                                                                                                 | Retouched<br>Flake | 5 | 0.00 | 0.00 | 0.12 | 0.00 | 0.88 | 0.21 |
| 1033 | *                                                                                                                                 | Retouched<br>Flake | 5 | 0.00 | 0.00 | 0.00 | 0.00 | 1.00 | 0.00 |
| 1033 | *                                                                                                                                 | Retouched<br>Flake | 5 | 0.00 | 0.00 | 0.00 | 0.00 | 1.00 | 0.00 |
| 1033 | *                                                                                                                                 | Debordant<br>Flake | 3 | 0.00 | 0.00 | 0.99 | 0.00 | 0.01 | 0.02 |
| 1033 | *                                                                                                                                 | Retouched<br>Flake | 5 | 0.00 | 0.00 | 0.34 | 0.00 | 0.66 | 0.45 |
| 1033 | *                                                                                                                                 | Retouched<br>Flake | 5 | 0.00 | 0.00 | 0.00 | 0.02 | 0.98 | 0.04 |
| 1033 | *                                                                                                                                 | Retouched<br>Point | 1 | 0.00 | 0.00 | 0.31 | 0.68 | 0.01 | 0.44 |
| 1033 | *                                                                                                                                 | Retouched<br>Flake | 5 | 0.00 | 0.00 | 0.38 | 0.16 | 0.45 | 0.63 |
| 1033 | *                                                                                                                                 | Retouched<br>Flake | 3 | 0.00 | 0.00 | 0.99 | 0.00 | 0.01 | 0.02 |
| 1033 | *                                                                                                                                 | Debordant<br>Flake | 3 | 0.00 | 0.00 | 0.99 | 0.00 | 0.01 | 0.02 |
| 1033 | *                                                                                                                                 | Retouched<br>Blade | 3 | 0.00 | 0.00 | 0.99 | 0.00 | 0.01 | 0.02 |
| 1033 | *                                                                                                                                 | Retouched<br>Flake | 3 | 0.00 | 0.00 | 0.86 | 0.00 | 0.14 | 0.24 |
| 1033 | *                                                                                                                                 | Retouched<br>Flake | 5 | 0.00 | 0.00 | 0.42 | 0.00 | 0.57 | 0.50 |
| 1033 | *                                                                                                                                 | Debordant<br>Flake | 3 | 0.00 | 0.00 | 0.99 | 0.00 | 0.01 | 0.02 |
| 1033 | *                                                                                                                                 | Retouched<br>Flake | 5 | 0.00 | 0.00 | 0.27 | 0.00 | 0.73 | 0.39 |
| 1033 | *                                                                                                                                 | Retouched<br>Flake | 5 | 0.00 | 0.00 | 0.16 | 0.00 | 0.84 | 0.27 |
| 1033 | *                                                                                                                                 | Retouched<br>Flake | 3 | 0.00 | 0.00 | 0.99 | 0.00 | 0.01 | 0.02 |
| 1033 | *                                                                                                                                 | Retouched<br>Flake | 5 | 0.00 | 0.00 | 0.11 | 0.00 | 0.89 | 0.20 |
| 1033 | *                                                                                                                                 | Retouched<br>Flake | 5 | 0.00 | 0.00 | 0.00 | 0.00 | 1.00 | 0.00 |
| 1033 | *                                                                                                                                 | Retouched<br>Flake | 5 | 0.00 | 0.00 | 0.05 | 0.00 | 0.95 | 0.10 |
| 1033 | *                                                                                                                                 | Debordant<br>Flake | 3 | 0.00 | 0.00 | 0.99 | 0.00 | 0.01 | 0.02 |
| 1033 | *                                                                                                                                 | Retouched<br>Flake | 3 | 0.00 | 0.00 | 0.63 | 0.00 | 0.37 | 0.47 |
| 1033 | *                                                                                                                                 | Retouched<br>Flake | 5 | 0.00 | 0.00 | 0.27 | 0.00 | 0.73 | 0.39 |

|        |                                                                                                                                        |                     |   |      |      |      |      |      |      |
|--------|----------------------------------------------------------------------------------------------------------------------------------------|---------------------|---|------|------|------|------|------|------|
| 1033   | *                                                                                                                                      | Retouched<br>Flake  | 5 | 0.03 | 0.00 | 0.09 | 0.00 | 0.88 | 0.22 |
| 1033   | *                                                                                                                                      | Retouched<br>Flake  | 5 | 0.00 | 0.00 | 0.00 | 0.00 | 1.00 | 0.00 |
| 1033   | *                                                                                                                                      | Retouched<br>Flake  | 3 | 0.00 | 0.00 | 0.74 | 0.00 | 0.26 | 0.38 |
| 1033   | *                                                                                                                                      | Retouched<br>Flake  | 5 | 0.00 | 0.00 | 0.07 | 0.00 | 0.93 | 0.13 |
| 1033   | *                                                                                                                                      | Retouched<br>Flake  | 5 | 0.00 | 0.00 | 0.00 | 0.00 | 1.00 | 0.00 |
| E-76-4 | *                                                                                                                                      | Bifacial<br>Foliate | 2 | 0.99 | 0.00 | 0.00 | 0.00 | 0.00 | 0.02 |
| 8708   | 8703-18                                                                                                                                | Retouched<br>Point  | 1 | 0.00 | 0.00 | 0.44 | 0.54 | 0.02 | 0.51 |
| 8708   | 8708-77                                                                                                                                | Retouched<br>Flake  | 3 | 0.00 | 0.00 | 0.53 | 0.00 | 0.47 | 0.50 |
| 8708   | 8708-99                                                                                                                                | Retouched<br>Flake  | 3 | 0.00 | 0.00 | 0.97 | 0.00 | 0.03 | 0.06 |
| 8708   | 8708-86                                                                                                                                | Retouched<br>Flake  | 3 | 0.00 | 0.00 | 0.99 | 0.00 | 0.01 | 0.02 |
| 8708   | 8708-19                                                                                                                                | Retouched<br>Point  | 1 | 0.00 | 0.00 | 0.00 | 1.00 | 0.00 | 0.00 |
| 8708   | unmarked<br>Bag 1: unmarked but<br>illustrated fig 97h<br>"borer"                                                                      | Retouched<br>Flake  | 5 | 0.00 | 0.00 | 0.00 | 0.00 | 1.00 | 0.00 |
| 8708   | 75                                                                                                                                     | Retouched<br>Flake  | 3 | 0.00 | 0.00 | 0.99 | 0.00 | 0.01 | 0.02 |
| 8708   | 3                                                                                                                                      | Retouched<br>Point  | 1 | 0.00 | 0.00 | 0.00 | 0.99 | 0.01 | 0.02 |
| 8708   | 78                                                                                                                                     | Retouched<br>Flake  | 5 | 0.00 | 0.00 | 0.00 | 0.00 | 1.00 | 0.00 |
| 8708   | 45                                                                                                                                     | Retouched<br>Flake  | 5 | 0.00 | 0.00 | 0.06 | 0.00 | 0.94 | 0.11 |
| 8708   | 136 Bag 1: looks like<br>this is fig 96f which<br>AH thinks is object 96.<br>Described as bifacial<br>foliate but this is<br>unifacial | Retouched<br>Flake  | 3 | 0.00 | 0.00 | 0.91 | 0.03 | 0.07 | 0.17 |
| 8708   | 2                                                                                                                                      | Retouched<br>Point  | 3 | 0.00 | 0.00 | 0.60 | 0.27 | 0.12 | 0.55 |
| 8708   | 94                                                                                                                                     | Retouched<br>Flake  | 3 | 0.00 | 0.00 | 0.50 | 0.23 | 0.27 | 0.62 |
| 8708   | 92                                                                                                                                     | Retouched<br>Blade  | 3 | 0.00 | 0.00 | 1.00 | 0.00 | 0.00 | 0.00 |
| 8708   | 42                                                                                                                                     | Retouched<br>Blade  | 3 | 0.00 | 0.00 | 0.97 | 0.00 | 0.03 | 0.06 |
| 8708   | 20                                                                                                                                     | Retouched<br>Point  | 1 | 0.28 | 0.00 | 0.04 | 0.67 | 0.00 | 0.47 |
| 8708   | 97                                                                                                                                     | Flake               | 1 | 0.04 | 0.00 | 0.24 | 0.72 | 0.00 | 0.42 |
| 8708   | 85                                                                                                                                     | Bifacial<br>Foliate | 2 | 0.80 | 0.00 | 0.03 | 0.01 | 0.17 | 0.33 |

|      |                                                         |                    |   |      |      |      |      |      |      |
|------|---------------------------------------------------------|--------------------|---|------|------|------|------|------|------|
| 8708 | 105                                                     | Retouched<br>Blade | 1 | 0.00 | 0.00 | 0.20 | 0.65 | 0.15 | 0.52 |
| 8708 | 21                                                      | Retouched<br>Flake | 2 | 0.94 | 0.00 | 0.03 | 0.03 | 0.00 | 0.11 |
| 8708 | 125                                                     | Retouched<br>Flake | 5 | 0.00 | 0.00 | 0.00 | 0.00 | 1.00 | 0.00 |
| 8708 | unmarked                                                | Retouched<br>Flake | 5 | 0.00 | 0.00 | 0.00 | 0.00 | 1.00 | 0.00 |
| 8708 | 55                                                      | Retouched<br>Blade | 5 | 0.00 | 0.00 | 0.00 | 0.00 | 1.00 | 0.00 |
| 8708 | 95                                                      | Retouched<br>Flake | 1 | 0.00 | 0.00 | 0.37 | 0.62 | 0.01 | 0.48 |
| 8708 | 29                                                      | Retouched<br>Flake | 5 | 0.00 | 0.00 | 0.00 | 0.00 | 1.00 | 0.00 |
| 8708 | 4                                                       | Retouched<br>Flake | 5 | 0.00 | 0.00 | 0.00 | 0.00 | 1.00 | 0.00 |
| 8708 | 121                                                     | Retouched<br>Flake | 5 | 0.00 | 0.00 | 0.00 | 0.00 | 1.00 | 0.00 |
| 8708 | 11 Bag 1: illustrated pg<br>86 fig 97g<br>"denticulate" | Retouched<br>Flake | 3 | 0.00 | 0.00 | 0.91 | 0.08 | 0.01 | 0.17 |
| 8708 | 22                                                      | Retouched<br>Flake | 3 | 0.00 | 0.00 | 0.91 | 0.07 | 0.02 | 0.17 |
| 8708 | 53                                                      | Retouched<br>Flake | 5 | 0.00 | 0.00 | 0.00 | 0.04 | 0.96 | 0.08 |
| 8708 | 73                                                      | Retouched<br>Flake | 3 | 0.00 | 0.00 | 0.87 | 0.04 | 0.09 | 0.23 |
| 8708 | 43                                                      | Retouched<br>Flake | 5 | 0.00 | 0.00 | 0.00 | 0.00 | 1.00 | 0.00 |
| 8708 | 80                                                      | Retouched<br>Flake | 5 | 0.00 | 0.00 | 0.00 | 0.00 | 1.00 | 0.00 |
| 8708 | 36                                                      | Retouched<br>Flake | 3 | 0.00 | 0.00 | 0.84 | 0.00 | 0.15 | 0.27 |
| 8708 | 76                                                      | Retouched<br>Flake | 5 | 0.00 | 0.00 | 0.00 | 0.00 | 1.00 | 0.00 |
| 8708 | 46                                                      | Retouched<br>Flake | 2 | 0.75 | 0.00 | 0.03 | 0.04 | 0.18 | 0.40 |
| 8708 | 47                                                      | Retouched<br>Flake | 5 | 0.00 | 0.00 | 0.00 | 0.00 | 1.00 | 0.00 |
| 8708 | 52                                                      | Retouched<br>Flake | 5 | 0.00 | 0.00 | 0.02 | 0.00 | 0.98 | 0.04 |
| 8708 | 1                                                       | Retouched<br>Flake | 1 | 0.18 | 0.00 | 0.00 | 0.79 | 0.02 | 0.34 |
| 8708 | 130                                                     | Retouched<br>Flake | 5 | 0.00 | 0.00 | 0.00 | 0.00 | 1.00 | 0.00 |
| 8708 | 49                                                      | Retouched<br>Flake | 3 | 0.00 | 0.00 | 0.61 | 0.12 | 0.26 | 0.55 |
| 8708 | 50                                                      | Retouched<br>Flake | 5 | 0.00 | 0.00 | 0.00 | 0.00 | 1.00 | 0.00 |
| 8708 | 7                                                       | Retouched<br>Flake | 5 | 0.00 | 0.00 | 0.00 | 0.00 | 1.00 | 0.00 |
| 8708 | 82                                                      | Retouched<br>Flake | 5 | 0.00 | 0.00 | 0.00 | 0.00 | 1.00 | 0.00 |

|      |                                   |                    |   |      |      |      |      |      |      |
|------|-----------------------------------|--------------------|---|------|------|------|------|------|------|
| 8708 | 89                                | Retouched<br>Flake | 3 | 0.00 | 0.00 | 0.91 | 0.00 | 0.09 | 0.16 |
| 8708 | 79                                | Retouched<br>Flake | 5 | 0.00 | 0.00 | 0.06 | 0.00 | 0.94 | 0.11 |
| 8708 | 81                                | Retouched<br>Flake | 5 | 0.00 | 0.00 | 0.11 | 0.00 | 0.89 | 0.20 |
| 8708 | 116                               | Retouched<br>Flake | 5 | 0.00 | 0.00 | 0.00 | 0.00 | 1.00 | 0.00 |
| 8708 | 14                                | Retouched<br>Flake | 4 | 0.00 | 1.00 | 0.00 | 0.00 | 0.00 | 0.00 |
| 8708 | 84                                | Retouched<br>Flake | 5 | 0.00 | 0.00 | 0.00 | 0.00 | 1.00 | 0.00 |
| 8708 | 59                                | Retouched<br>Flake | 3 | 0.00 | 0.00 | 0.82 | 0.09 | 0.10 | 0.31 |
| 8708 | 115                               | Retouched<br>Flake | 3 | 0.00 | 0.00 | 0.97 | 0.02 | 0.01 | 0.06 |
| 8708 | unmarked                          | Retouched<br>Flake | 1 | 0.00 | 0.00 | 0.01 | 0.93 | 0.06 | 0.13 |
| 8708 | 70                                | Retouched<br>Flake | 5 | 0.00 | 0.00 | 0.01 | 0.00 | 0.99 | 0.02 |
| 8751 | *                                 | Retouched<br>Flake | 5 | 0.00 | 0.00 | 0.13 | 0.00 | 0.87 | 0.23 |
| 8751 | *                                 | Retouched<br>Flake | 3 | 0.00 | 0.00 | 0.93 | 0.00 | 0.07 | 0.13 |
| 8751 | *                                 | Retouched<br>Flake | 5 | 0.00 | 0.00 | 0.21 | 0.00 | 0.79 | 0.33 |
| 8751 | *                                 | Retouched<br>Flake | 4 | 0.00 | 0.75 | 0.25 | 0.00 | 0.00 | 0.38 |
| 8751 | *                                 | Retouched<br>Flake | 5 | 0.00 | 0.00 | 0.00 | 0.00 | 1.00 | 0.00 |
| 8751 | *                                 | Retouched<br>Flake | 3 | 0.00 | 0.00 | 0.99 | 0.00 | 0.01 | 0.02 |
| 8751 | *                                 | Retouched<br>Flake | 5 | 0.00 | 0.00 | 0.00 | 0.00 | 1.00 | 0.00 |
| 8751 | *                                 | Retouched<br>Flake | 5 | 0.00 | 0.00 | 0.02 | 0.00 | 0.97 | 0.06 |
| 8751 | *                                 | Retouched<br>Flake | 5 | 0.00 | 0.00 | 0.00 | 0.00 | 1.00 | 0.00 |
| 8751 | *                                 | Retouched<br>Flake | 3 | 0.00 | 0.00 | 0.99 | 0.00 | 0.01 | 0.02 |
| 8751 | *                                 | Retouched<br>Flake | 1 | 0.00 | 0.00 | 0.00 | 1.00 | 0.00 | 0.00 |
| 8751 | *                                 | Retouched<br>Flake | 5 | 0.00 | 0.00 | 0.00 | 0.00 | 1.00 | 0.00 |
| 8751 | *                                 | Retouched<br>Flake | 5 | 0.00 | 0.00 | 0.11 | 0.00 | 0.89 | 0.20 |
| 8751 | *Bag 1: convergent<br>sidescraper | Retouched<br>Flake | 3 | 0.00 | 0.00 | 0.62 | 0.25 | 0.13 | 0.54 |
| 8751 | *                                 | Retouched<br>Flake | 5 | 0.00 | 0.00 | 0.03 | 0.00 | 0.97 | 0.06 |
| 8751 | *                                 | Retouched<br>Flake | 5 | 0.00 | 0.00 | 0.03 | 0.00 | 0.97 | 0.06 |
| 8751 | *                                 | Retouched<br>Flake | 5 | 0.00 | 0.00 | 0.14 | 0.00 | 0.86 | 0.24 |

|      |                                            |                    |   |      |      |      |      |      |      |
|------|--------------------------------------------|--------------------|---|------|------|------|------|------|------|
| 8751 | *                                          | Blade              | 4 | 0.00 | 1.00 | 0.00 | 0.00 | 0.00 | 0.00 |
| 8751 | *                                          | Blade              | 4 | 0.00 | 1.00 | 0.00 | 0.00 | 0.00 | 0.00 |
| 8751 | *                                          | Blade              | 4 | 0.00 | 1.00 | 0.00 | 0.00 | 0.00 | 0.00 |
| 8751 | *                                          | Blade              | 4 | 0.00 | 1.00 | 0.00 | 0.00 | 0.00 | 0.00 |
| 8751 | *                                          | Blade              | 4 | 0.00 | 1.00 | 0.00 | 0.00 | 0.00 | 0.00 |
| 8751 | *                                          | Retouched<br>Blade | 3 | 0.00 | 0.00 | 1.00 | 0.00 | 0.00 | 0.00 |
| 8751 | *                                          | Retouched<br>Flake | 5 | 0.00 | 0.00 | 0.03 | 0.00 | 0.97 | 0.06 |
| 8751 | * Bag 4: see row 191<br>cores (triangular) | Biface             | 3 | 0.20 | 0.02 | 0.71 | 0.00 | 0.07 | 0.45 |
| 8751 | *                                          | Retouched<br>Flake | 5 | 0.00 | 0.00 | 0.01 | 0.02 | 0.96 | 0.08 |
| 8751 | *                                          | Retouched<br>Blade | 3 | 0.00 | 0.00 | 0.99 | 0.01 | 0.00 | 0.02 |
| 8751 | *                                          | Retouched<br>Flake | 5 | 0.00 | 0.00 | 0.13 | 0.00 | 0.87 | 0.23 |
| 8751 | *                                          | Retouched<br>Flake | 5 | 0.00 | 0.00 | 0.00 | 0.00 | 1.00 | 0.00 |
| 8751 | *                                          | Retouched<br>Flake | 3 | 0.00 | 0.00 | 0.99 | 0.00 | 0.01 | 0.02 |
| 8751 | *                                          | Retouched<br>Flake | 3 | 0.00 | 0.00 | 0.99 | 0.00 | 0.01 | 0.02 |
| 8751 | *                                          | Retouched<br>Flake | 3 | 0.00 | 0.00 | 0.87 | 0.04 | 0.09 | 0.23 |
| 8751 | *                                          | Blade              | 4 | 0.00 | 1.00 | 0.00 | 0.00 | 0.00 | 0.00 |
| 8751 | *                                          | Retouched<br>Flake | 5 | 0.00 | 0.00 | 0.00 | 0.00 | 1.00 | 0.00 |
| 8751 | *                                          | Retouched<br>Flake | 5 | 0.00 | 0.00 | 0.23 | 0.30 | 0.47 | 0.64 |
| 8751 | *                                          | Retouched<br>Flake | 3 | 0.00 | 0.00 | 0.71 | 0.00 | 0.29 | 0.41 |
| 8751 | *                                          | Retouched<br>Flake | 3 | 0.00 | 0.00 | 0.86 | 0.00 | 0.14 | 0.24 |
| 8751 | *                                          | Retouched<br>Flake | 5 | 0.00 | 0.00 | 0.00 | 0.00 | 1.00 | 0.00 |
| 8751 | *                                          | Retouched<br>Flake | 3 | 0.00 | 0.00 | 0.72 | 0.00 | 0.28 | 0.40 |
| 8751 | *                                          | Retouched<br>Flake | 5 | 0.00 | 0.00 | 0.00 | 0.00 | 1.00 | 0.00 |
| 8751 | *                                          | Retouched<br>Flake | 5 | 0.00 | 0.00 | 0.00 | 0.11 | 0.89 | 0.20 |
| 8751 | *                                          | Retouched<br>Flake | 5 | 0.00 | 0.00 | 0.00 | 0.07 | 0.93 | 0.13 |
| 8751 | *                                          | Retouched<br>Flake | 1 | 0.00 | 0.00 | 0.00 | 0.97 | 0.03 | 0.06 |
| 8751 | *                                          | Retouched<br>Flake | 5 | 0.00 | 0.00 | 0.00 | 0.00 | 1.00 | 0.00 |
| 8751 | *                                          | Retouched<br>Flake | 3 | 0.00 | 0.00 | 0.84 | 0.00 | 0.16 | 0.27 |

|      |                                                                                 |                    |   |      |      |      |      |      |      |
|------|---------------------------------------------------------------------------------|--------------------|---|------|------|------|------|------|------|
| 8751 | *                                                                               | Retouched<br>Flake | 5 | 0.00 | 0.00 | 0.00 | 0.02 | 0.98 | 0.04 |
| 8751 | *                                                                               | Retouched<br>Flake | 3 | 0.00 | 0.00 | 0.79 | 0.00 | 0.21 | 0.33 |
| 8751 | *                                                                               | Retouched<br>Flake | 3 | 0.00 | 0.00 | 0.97 | 0.00 | 0.03 | 0.06 |
| 8751 | *                                                                               | Retouched<br>Flake | 5 | 0.00 | 0.00 | 0.00 | 0.00 | 1.00 | 0.00 |
| 8751 | *                                                                               | Retouched<br>Flake | 3 | 0.00 | 0.00 | 0.98 | 0.00 | 0.01 | 0.04 |
| 8751 | *                                                                               | Retouched<br>Flake | 5 | 0.03 | 0.00 | 0.00 | 0.38 | 0.60 | 0.49 |
| 8751 | *                                                                               | Retouched<br>Flake | 5 | 0.00 | 0.00 | 0.00 | 0.19 | 0.81 | 0.31 |
| 8751 | *                                                                               | Retouched<br>Flake | 5 | 0.00 | 0.00 | 0.00 | 0.00 | 1.00 | 0.00 |
| 8751 | 21                                                                              | Retouched<br>Flake | 1 | 0.00 | 0.00 | 0.30 | 0.43 | 0.27 | 0.65 |
| 8751 | * Ovate                                                                         | Biface             | 5 | 0.07 | 0.07 | 0.27 | 0.08 | 0.52 | 0.64 |
| 8751 | *                                                                               | Retouched<br>Flake | 5 | 0.00 | 0.00 | 0.00 | 0.00 | 1.00 | 0.00 |
| 8751 | 2                                                                               | Retouched<br>Flake | 5 | 0.00 | 0.00 | 0.15 | 0.06 | 0.79 | 0.35 |
| 8751 | 42                                                                              | Retouched<br>Flake | 5 | 0.00 | 0.00 | 0.12 | 0.00 | 0.88 | 0.21 |
| 8751 | 25                                                                              | Retouched<br>Flake | 5 | 0.00 | 0.00 | 0.12 | 0.27 | 0.62 | 0.53 |
| 8751 | 42                                                                              | Retouched<br>Flake | 5 | 0.00 | 0.00 | 0.01 | 0.00 | 0.99 | 0.02 |
| 8751 | *                                                                               | Biface             | 3 | 0.09 | 0.15 | 0.46 | 0.07 | 0.23 | 0.70 |
| 8751 | 42                                                                              | Retouched<br>Flake | 5 | 0.00 | 0.00 | 0.00 | 0.00 | 1.00 | 0.00 |
| 8751 | 42                                                                              | Retouched<br>Flake | 5 | 0.00 | 0.00 | 0.34 | 0.14 | 0.52 | 0.59 |
| 8751 | 46                                                                              | Retouched<br>Flake | 5 | 0.00 | 0.00 | 0.01 | 0.00 | 0.99 | 0.02 |
| 8751 | *                                                                               | Retouched<br>Flake | 5 | 0.00 | 0.00 | 0.00 | 0.00 | 1.00 | 0.00 |
| 8735 | 8735-15 (43 in pencil)                                                          | Retouched<br>Flake | 5 | 0.00 | 0.00 | 0.02 | 0.00 | 0.98 | 0.04 |
| 8735 | 8735-34 remarked 40<br>and 42 truncated flake<br>and hollow edge<br>scraper     | Retouched<br>Flake | 5 | 0.00 | 0.00 | 0.06 | 0.00 | 0.94 | 0.11 |
| 8735 | 8735-14 also marked<br>42 and 43 Hollow edge<br>scraper and denticulate<br>tool | Retouched<br>Flake | 3 | 0.00 | 0.00 | 0.39 | 0.39 | 0.22 | 0.65 |
| 8735 | 8735-12                                                                         | Retouched<br>Flake | 5 | 0.00 | 0.00 | 0.00 | 0.00 | 1.00 | 0.00 |
| 8735 | 8735-21 also marked<br>43 'denticulate tool'                                    | Retouched<br>Flake | 5 | 0.00 | 0.00 | 0.00 | 0.00 | 1.00 | 0.00 |

|      |                                                                     |                 |   |      |      |      |      |      |      |
|------|---------------------------------------------------------------------|-----------------|---|------|------|------|------|------|------|
| 8735 | 8735-19 also marked 5 and 42 'hollow edge scraper'                  | Retouched Flake | 3 | 0.00 | 0.00 | 0.96 | 0.00 | 0.04 | 0.08 |
| 8735 | marked 25 and 44                                                    | Retouched Flake | 5 | 0.00 | 0.00 | 0.01 | 0.00 | 0.99 | 0.02 |
| 8735 | marked 44 and 42                                                    | Retouched Flake | 5 | 0.00 | 0.00 | 0.00 | 0.00 | 1.00 | 0.00 |
| 8735 | unmarked                                                            | Retouched Flake | 5 | 0.00 | 0.00 | 0.07 | 0.00 | 0.93 | 0.13 |
| 8735 | unmarked type 30 'typical end scraper'                              | Retouched Flake | 5 | 0.00 | 0.00 | 0.14 | 0.00 | 0.85 | 0.26 |
| 8735 | unmarked, type 43 'Denticulate Tool'                                | Retouched Flake | 3 | 0.00 | 0.00 | 0.56 | 0.03 | 0.41 | 0.52 |
| 8735 | unmarked type 25                                                    | Retouched Flake | 5 | 0.00 | 0.00 | 0.00 | 0.00 | 1.00 | 0.00 |
| 8735 | unmarked, type 43 'denticulate tool'                                | Retouched Flake | 5 | 0.00 | 0.00 | 0.00 | 0.00 | 1.00 | 0.00 |
| 8735 | unmarked                                                            | Retouched Flake | 1 | 0.00 | 0.00 | 0.24 | 0.66 | 0.10 | 0.50 |
| 8735 | unmarked, type 40, 43, 44                                           | Retouched Flake | 3 | 0.03 | 0.00 | 0.90 | 0.04 | 0.03 | 0.19 |
| 8735 | unmarked, type 42 'hollow edge scraper'                             | Retouched Point | 5 | 0.00 | 0.00 | 0.00 | 0.00 | 1.00 | 0.00 |
| 8735 | unmarked, type 40 'truncated flake'                                 | Retouched Flake | 3 | 0.00 | 0.00 | 0.85 | 0.14 | 0.00 | 0.26 |
| 8735 | unmarked, type 30-31 'end scraper'                                  | Retouched Flake | 5 | 0.00 | 0.00 | 0.03 | 0.00 | 0.97 | 0.06 |
| 8735 | unmarked, type 40 'truncated flake'                                 | Retouched Flake | 3 | 0.00 | 0.00 | 0.85 | 0.00 | 0.15 | 0.26 |
| 8735 | unmarked, type 1-2                                                  | Retouched Flake | 3 | 0.00 | 0.00 | 0.87 | 0.04 | 0.09 | 0.23 |
| 8735 | unmarked, type 36 'backed knife'                                    | Retouched Flake | 3 | 0.00 | 0.00 | 0.96 | 0.00 | 0.03 | 0.08 |
| 8735 | unmarked                                                            | Retouched Point | 1 | 0.00 | 0.00 | 0.08 | 0.78 | 0.15 | 0.36 |
| 8735 | unmarked, type 62 'other tools'                                     | Retouched Flake | 5 | 0.00 | 0.00 | 0.08 | 0.00 | 0.91 | 0.17 |
| 8735 | unmarked, type 30-31 'end scraper'                                  | Retouched Flake | 5 | 0.00 | 0.00 | 0.03 | 0.00 | 0.97 | 0.06 |
| 8735 | unmarked, type 48-49 'Abrupt retouch alternating faces, Mousterian' | Retouched Flake | 5 | 0.00 | 0.00 | 0.06 | 0.32 | 0.62 | 0.51 |
| 8735 | unmarked, type 42 'hollow edge scraper'                             | Retouched Flake | 5 | 0.00 | 0.00 | 0.00 | 0.00 | 1.00 | 0.00 |
| 8735 | unmarked, type 44 'alternating backed tool (bec)'                   | Retouched Flake | 5 | 0.00 | 0.00 | 0.00 | 0.00 | 1.00 | 0.00 |
| 8735 | unmarked, type 43 'denticulate tool'                                | Retouched Flake | 3 | 0.00 | 0.00 | 0.96 | 0.03 | 0.00 | 0.08 |
| 8735 | unmarked, type 30-31 'end scraper'                                  | Retouched Flake | 5 | 0.00 | 0.00 | 0.42 | 0.00 | 0.57 | 0.50 |
| 8735 | unmarked, type 34 'Graver'                                          | Retouched Flake | 4 | 0.00 | 1.00 | 0.00 | 0.00 | 0.00 | 0.00 |

|                 |                                                            |                    |   |      |      |      |      |      |      |
|-----------------|------------------------------------------------------------|--------------------|---|------|------|------|------|------|------|
| 8735            | 8735-2 type 43<br>'Denticulate Tool'                       | Retouched<br>Flake | 5 | 0.00 | 0.00 | 0.00 | 0.00 | 1.00 | 0.00 |
| 8735            | 16                                                         | Retouched<br>Flake | 5 | 0.00 | 0.00 | 0.21 | 0.03 | 0.75 | 0.39 |
| 8735            | 15                                                         | Retouched<br>Flake | 1 | 0.00 | 0.00 | 0.44 | 0.55 | 0.01 | 0.50 |
| 8735            | unmarked                                                   | Retouched<br>Flake | 5 | 0.00 | 0.00 | 0.37 | 0.10 | 0.52 | 0.58 |
| 8735            | unmarked                                                   | Retouched<br>Flake | 2 | 0.72 | 0.00 | 0.00 | 0.01 | 0.26 | 0.41 |
| 8735            | unmarked                                                   | Retouched<br>Flake | 3 | 0.00 | 0.00 | 0.45 | 0.23 | 0.33 | 0.64 |
| 8735            | unmarked                                                   | Retouched<br>Point | 2 | 0.71 | 0.00 | 0.01 | 0.26 | 0.03 | 0.43 |
| 8735            | unmarked type 58<br>'other tools with stems'               | Retouched<br>Flake | 3 | 0.00 | 0.00 | 0.73 | 0.00 | 0.27 | 0.39 |
| Kharga<br>Oasis | P1989 1-2 430                                              | Retouched<br>Point | 1 | 0.27 | 0.00 | 0.09 | 0.63 | 0.01 | 0.52 |
| Kharga<br>Oasis | P1989 1-2 434                                              | Retouched<br>Flake | 1 | 0.00 | 0.00 | 0.00 | 0.87 | 0.13 | 0.23 |
| Kharga<br>Oasis | P1989 1-2 441                                              | Retouched<br>Flake | 1 | 0.00 | 0.00 | 0.00 | 0.98 | 0.02 | 0.04 |
| Kharga<br>Oasis | P1989 1-2 442                                              | Retouched<br>Flake | 5 | 0.00 | 0.00 | 0.00 | 0.00 | 1.00 | 0.00 |
| Kharga<br>Oasis | P1989 1-2 443<br>Convergent Side<br>Scraper on Levallois   | Retouched<br>Flake | 1 | 0.00 | 0.00 | 0.01 | 0.86 | 0.13 | 0.24 |
| Kharga<br>Oasis | P1989 1-2 444 See<br>Plate 89: 2; 'double<br>ended scraper | Retouched<br>Flake | 5 | 0.00 | 0.00 | 0.06 | 0.23 | 0.71 | 0.44 |
| Kharga<br>Oasis | P1989 1-2 445                                              | Retouched<br>Flake | 3 | 0.00 | 0.00 | 0.60 | 0.00 | 0.40 | 0.48 |
| Kharga<br>Oasis | P1989 1-2 446                                              | Retouched<br>Flake | 5 | 0.00 | 0.00 | 0.00 | 0.00 | 1.00 | 0.00 |
| Kharga<br>Oasis | P1989 1-2 447                                              | Retouched<br>Flake | 5 | 0.00 | 0.00 | 0.00 | 0.00 | 1.00 | 0.00 |
| Kharga<br>Oasis | P1989 1-2 448                                              | Retouched<br>Flake | 5 | 0.00 | 0.00 | 0.00 | 0.00 | 1.00 | 0.00 |
| Kharga<br>Oasis | P1989 1-2 449                                              | Retouched<br>Flake | 1 | 0.01 | 0.00 | 0.14 | 0.84 | 0.01 | 0.27 |
| Kharga<br>Oasis | P1989 1-2 450<br>Transverse Scraper                        | Retouched<br>Flake | 5 | 0.00 | 0.00 | 0.28 | 0.16 | 0.57 | 0.57 |
| Kharga<br>Oasis | P1989 1-2 452<br>Alternate Retouched<br>Side Scraper       | Retouched<br>Flake | 3 | 0.00 | 0.00 | 0.87 | 0.09 | 0.03 | 0.23 |
| Kharga<br>Oasis | P1989 1-2 454                                              | Retouched<br>Flake | 5 | 0.00 | 0.00 | 0.00 | 0.00 | 1.00 | 0.00 |
| Kharga<br>Oasis | P1989 1-2 455                                              | Retouched<br>Blade | 3 | 0.00 | 0.00 | 0.92 | 0.08 | 0.00 | 0.15 |
| Kharga<br>Oasis | P1989 1-2 460                                              | Retouched<br>Flake | 5 | 0.00 | 0.00 | 0.00 | 0.02 | 0.98 | 0.04 |
| Kharga<br>Oasis | P1989 1-2 466                                              | Retouched<br>Flake | 1 | 0.00 | 0.00 | 0.35 | 0.42 | 0.23 | 0.65 |

|              |                                                          |                        |   |      |      |                                      |      |      |      |
|--------------|----------------------------------------------------------|------------------------|---|------|------|--------------------------------------|------|------|------|
| Kharga Oasis | P1989 1-2 473                                            | Retouched Flake        | 1 | 0.00 | 0.00 | 0.08                                 | 0.78 | 0.15 | 0.36 |
| Kharga Oasis | P1989 1-2 475                                            | Retouched Flake        | 1 | 0.00 | 0.00 | 0.00                                 | 0.79 | 0.21 | 0.33 |
| Kharga Oasis | P1989 1-2 477<br>Atypical Convergent Side Scraper        | Retouched Flake        | 1 | 0.00 | 0.00 | 0.08                                 | 0.78 | 0.15 | 0.36 |
| Kharga Oasis | P1989 1-2 478                                            | Retouched Flake        | 5 | 0.00 | 0.00 | 0.00                                 | 0.01 | 0.99 | 0.02 |
| Kharga Oasis | P1989 1-2 1278                                           | Biface                 | 2 | 0.97 | 0.00 | 0.01                                 | 0.01 | 0.01 | 0.06 |
| Kharga Oasis | P1989 1-2 1282                                           | Bifacial Foliate       | 2 | 0.95 | 0.00 | 0.01                                 | 0.03 | 0.01 | 0.10 |
| Kharga Oasis | P1989 1-2 1283                                           | Bifacial Foliate       | 2 | 1.00 | 0.00 | 0.00                                 | 0.00 | 0.00 | 0.00 |
| Kharga Oasis | P1989 1-2 1284                                           | Bifacial Foliate       | 2 | 0.85 | 0.00 | 0.00                                 | 0.15 | 0.00 | 0.26 |
| Kharga Oasis | P1989 1-2 1285                                           | Bifacial Foliate       | 2 | 0.97 | 0.00 | 0.01                                 | 0.02 | 0.00 | 0.06 |
| Kharga Oasis | P1989 1-2 1286                                           | Retouched Point        | 1 | 0.00 | 0.00 | 0.06                                 | 0.93 | 0.01 | 0.13 |
| Kharga Oasis | P1989 1-2 1287                                           | Retouched Point        | 1 | 0.00 | 0.00 | 0.06                                 | 0.93 | 0.01 | 0.13 |
| Kharga Oasis | P1989 1-2 1288                                           | Retouched Point        | 1 | 0.00 | 0.00 | 0.00                                 | 0.96 | 0.04 | 0.08 |
| Kharga Oasis | P1989 1-2 1289                                           | Retouched Point        | 1 | 0.00 | 0.00 | 0.14                                 | 0.85 | 0.01 | 0.26 |
| Kharga Oasis | P1989 1-2 1292                                           | Retouched Flake        | 5 | 0.00 | 0.00 | 0.06                                 | 0.23 | 0.71 | 0.44 |
| Kharga Oasis | P1989 1-2 1293 from base, Convergent Convex Side Scraper | Retouched Flake        | 5 | 0.00 | 0.00 | 0.06                                 | 0.23 | 0.71 | 0.44 |
| Kharga Oasis | P1989 1-2 1297                                           | Retouched Flake        | 5 | 0.00 | 0.00 | 0.00                                 | 0.00 | 1.00 | 0.00 |
| Kharga Oasis | P1989 1-2 1301                                           | Retouched Flake        | 3 | 0.00 | 0.00 | 0.93                                 | 0.02 | 0.05 | 0.13 |
| Kharga Oasis | P1989 1-2 1330                                           | Biface                 | 2 | 0.50 | 0.00 | 0.02                                 | 0.00 | 0.48 | 0.52 |
| Kharga Oasis | P1989 1-2 1377                                           | Retouched Flake        | 4 | 0.00 | 1.00 | 0.00                                 | 0.00 | 0.00 | 0.00 |
| Kharga Oasis | P1989 1-2 1380                                           | Pseudo Levallois Point | 4 | 0.00 | 1.00 | 0.00                                 | 0.00 | 0.00 | 0.00 |
| Kharga Oasis | P1989 1-2 1389                                           | Flake                  | 4 | 0.00 | 1.00 | 3.94<br>0554<br>4687<br>945e<br>-311 | 0.00 | 0.00 | 0.00 |
| Kharga Oasis | P1989 1-2 1401 Burin                                     | Retouched Flake        | 4 | 0.00 | 0.67 | 0.00                                 | 0.00 | 0.33 | 0.44 |
| Kharga Oasis | 50.2.52                                                  | Retouched Point        | 1 | 0.21 | 0.00 | 0.01                                 | 0.78 | 0.00 | 0.35 |
| Kharga Oasis | 1931-2 1994C 50.252                                      | Retouched Flake        | 1 | 0.00 | 0.00 | 0.00                                 | 0.67 | 0.33 | 0.44 |

|              |                     |                 |   |      |      |      |      |      |      |
|--------------|---------------------|-----------------|---|------|------|------|------|------|------|
| Kharga Oasis | 1931-2 C 50.252     | Retouched Flake | 5 | 0.00 | 0.00 | 0.00 | 0.00 | 1.00 | 0.00 |
| Kharga Oasis | 1932-22 50.252      | Retouched Flake | 3 | 0.00 | 0.00 | 0.55 | 0.02 | 0.44 | 0.50 |
| Kharga Oasis | 1931-2 2024C 50.252 | Retouched Point | 1 | 0.00 | 0.00 | 0.00 | 0.82 | 0.18 | 0.30 |
| Kharga Oasis | 1931-2 1993C 50.252 | Retouched Flake | 3 | 0.00 | 0.00 | 0.78 | 0.02 | 0.20 | 0.35 |
| Kharga Oasis | 1931-2 2011C        | Retouched Flake | 2 | 0.60 | 0.00 | 0.02 | 0.38 | 0.00 | 0.50 |
| Kharga Oasis | KO6EE               | Biface          | 2 | 0.92 | 0.00 | 0.03 | 0.00 | 0.05 | 0.15 |
| Krenoussa    | KRE476              | Retouched Flake | 5 | 0.00 | 0.00 | 0.00 | 0.00 | 1.00 | 0.00 |
| Krenoussa    | KRE543              | Retouched Flake | 5 | 0.00 | 0.00 | 0.00 | 0.00 | 1.00 | 0.00 |
| Krenoussa    | KRE196              | Retouched Flake | 5 | 0.00 | 0.00 | 0.44 | 0.03 | 0.53 | 0.52 |
| Krenoussa    | KRE309              | Retouched Flake | 3 | 0.03 | 0.00 | 0.87 | 0.02 | 0.08 | 0.24 |
| Krenoussa    | KRE289              | Retouched Flake | 5 | 0.00 | 0.00 | 0.04 | 0.00 | 0.96 | 0.08 |
| Krenoussa    | KRE78               | Retouched Flake | 2 | 0.36 | 0.00 | 0.33 | 0.31 | 0.01 | 0.67 |
| Krenoussa    | KRE141              | Retouched Flake | 5 | 0.00 | 0.00 | 0.00 | 0.00 | 1.00 | 0.00 |
| Krenoussa    | KRE131              | Retouched Flake | 5 | 0.00 | 0.00 | 0.00 | 0.00 | 1.00 | 0.00 |
| Krenoussa    | KRE127              | Retouched Flake | 5 | 0.00 | 0.00 | 0.43 | 0.08 | 0.49 | 0.57 |
| Krenoussa    | KRE340              | Retouched Flake | 1 | 0.00 | 0.00 | 0.00 | 0.99 | 0.01 | 0.02 |
| Krenoussa    | KRE39               | Retouched Flake | 5 | 0.00 | 0.00 | 0.00 | 0.00 | 1.00 | 0.00 |
| Krenoussa    | KRE189              | Retouched Flake | 5 | 0.00 | 0.00 | 0.00 | 0.00 | 1.00 | 0.00 |
| Krenoussa    | KRE277              | Retouched Flake | 5 | 0.00 | 0.00 | 0.00 | 0.00 | 1.00 | 0.00 |
| Krenoussa    | KRE799              | Retouched Flake | 5 | 0.04 | 0.00 | 0.09 | 0.00 | 0.87 | 0.23 |
| Krenoussa    | KRE874              | Retouched Flake | 5 | 0.00 | 0.00 | 0.00 | 0.00 | 1.00 | 0.00 |
| Krenoussa    | KRE283              | Retouched Flake | 5 | 0.00 | 0.00 | 0.00 | 0.00 | 1.00 | 0.00 |
| Krenoussa    | KRE144              | Retouched Flake | 5 | 0.00 | 0.00 | 0.06 | 0.27 | 0.66 | 0.49 |
| Krenoussa    | KRE104              | Retouched Flake | 5 | 0.00 | 0.00 | 0.17 | 0.00 | 0.83 | 0.28 |
| Krenoussa    | KRE548              | Retouched Flake | 5 | 0.00 | 0.00 | 0.02 | 0.00 | 0.98 | 0.04 |
| Krenoussa    | KRE34               | Retouched Flake | 5 | 0.00 | 0.00 | 0.17 | 0.01 | 0.81 | 0.31 |
| Krenoussa    | KRE63               | Retouched Flake | 5 | 0.00 | 0.00 | 0.00 | 0.00 | 1.00 | 0.00 |

|               |                                               |                    |   |      |      |      |      |      |      |
|---------------|-----------------------------------------------|--------------------|---|------|------|------|------|------|------|
| Krenouss<br>a | KRE735                                        | Retouched<br>Flake | 5 | 0.00 | 0.00 | 0.00 | 0.00 | 1.00 | 0.00 |
| Krenouss<br>a | KRE268                                        | Retouched<br>Flake | 3 | 0.00 | 0.00 | 0.80 | 0.02 | 0.18 | 0.33 |
| Krenouss<br>a | KRE236                                        | Retouched<br>Flake | 1 | 0.00 | 0.00 | 0.39 | 0.59 | 0.03 | 0.50 |
| Krenouss<br>a | KRE38                                         | Retouched<br>Flake | 5 | 0.00 | 0.00 | 0.04 | 0.00 | 0.96 | 0.08 |
| Krenouss<br>a | KRE690                                        | Retouched<br>Flake | 3 | 0.00 | 0.00 | 0.80 | 0.01 | 0.19 | 0.32 |
| Krenouss<br>a | KRE161                                        | Retouched<br>Flake | 5 | 0.00 | 0.00 | 0.27 | 0.02 | 0.71 | 0.42 |
| Krenouss<br>a | KRE234                                        | Retouched<br>Point | 1 | 0.00 | 0.00 | 0.02 | 0.97 | 0.01 | 0.06 |
| Krenouss<br>a | KRE715                                        | Retouched<br>Flake | 3 | 0.00 | 0.00 | 0.83 | 0.13 | 0.05 | 0.29 |
| Krenouss<br>a | KRE274                                        | Retouched<br>Flake | 5 | 0.00 | 0.00 | 0.23 | 0.00 | 0.77 | 0.35 |
| Krenouss<br>a | unmarked/ES3                                  | Retouched<br>Flake | 1 | 0.00 | 0.00 | 0.00 | 0.83 | 0.17 | 0.28 |
| Krenouss<br>a | unmarked/ES8                                  | Retouched<br>Flake | 5 | 0.00 | 0.00 | 0.00 | 0.23 | 0.76 | 0.37 |
| Krenouss<br>a | unmarked/ES9                                  | Retouched<br>Flake | 1 | 0.00 | 0.00 | 0.18 | 0.63 | 0.18 | 0.54 |
| Krenouss<br>a | unmarked/ES10 From<br>box with tangs: piercer | Retouched<br>Flake | 3 | 0.00 | 0.00 | 0.67 | 0.18 | 0.15 | 0.50 |
| Krenouss<br>a | unmarked/ES11                                 | Retouched<br>Flake | 1 | 0.00 | 0.00 | 0.05 | 0.94 | 0.01 | 0.11 |
| Krenouss<br>a | unmarked/ES13                                 | Retouched<br>Flake | 3 | 0.00 | 0.00 | 0.83 | 0.00 | 0.17 | 0.28 |
| Krenouss<br>a | unmarked/ES16                                 | Retouched<br>Flake | 5 | 0.00 | 0.00 | 0.00 | 0.00 | 1.00 | 0.00 |
| Krenouss<br>a | unmarked/ES17                                 | Retouched<br>Flake | 3 | 0.00 | 0.00 | 0.86 | 0.06 | 0.08 | 0.25 |
| Krenouss<br>a | unmarked/ES18                                 | Retouched<br>Flake | 3 | 0.00 | 0.00 | 0.60 | 0.14 | 0.27 | 0.55 |
| Krenouss<br>a | unmarked/ES22                                 | Retouched<br>Flake | 5 | 0.00 | 0.00 | 0.49 | 0.00 | 0.51 | 0.50 |
| Krenouss<br>a | unmarked/Es23                                 | Retouched<br>Flake | 1 | 0.00 | 0.00 | 0.24 | 0.66 | 0.10 | 0.50 |
| Krenouss<br>a | unmarked/ES24                                 | Retouched<br>Flake | 3 | 0.00 | 0.00 | 0.34 | 0.34 | 0.33 | 0.66 |
| Krenouss<br>a | unmarked/ES25                                 | Retouched<br>Flake | 3 | 0.00 | 0.00 | 0.87 | 0.01 | 0.13 | 0.23 |
| Krenouss<br>a | unmarked/ES28                                 | Retouched<br>Flake | 1 | 0.00 | 0.00 | 0.41 | 0.54 | 0.05 | 0.54 |
| Krenouss<br>a | unmarked/ES29                                 | Retouched<br>Flake | 5 | 0.00 | 0.00 | 0.00 | 0.00 | 1.00 | 0.00 |
| Krenouss<br>a | unmarked/ES30                                 | Retouched<br>Point | 1 | 0.00 | 0.00 | 0.24 | 0.66 | 0.10 | 0.50 |
| Krenouss<br>a | unmarked/ES31                                 | Retouched<br>Flake | 5 | 0.00 | 0.00 | 0.35 | 0.00 | 0.65 | 0.46 |
| Krenouss<br>a | unmarked/ES32                                 | Retouched<br>Flake | 5 | 0.00 | 0.00 | 0.06 | 0.23 | 0.71 | 0.44 |

|               |                     |                    |   |      |      |      |      |      |      |
|---------------|---------------------|--------------------|---|------|------|------|------|------|------|
| Krenouss<br>a | unmarked/ES34       | Retouched<br>Flake | 5 | 0.00 | 0.00 | 0.01 | 0.00 | 0.99 | 0.02 |
| Krenouss<br>a | unmarked/ES35       | Retouched<br>Flake | 3 | 0.00 | 0.00 | 0.34 | 0.34 | 0.33 | 0.66 |
| Krenouss<br>a | unmarked/ES38       | Retouched<br>Flake | 1 | 0.00 | 0.00 | 0.15 | 0.83 | 0.02 | 0.29 |
| Krenouss<br>a | unmarked/ES39       | Retouched<br>Flake | 3 | 0.00 | 0.00 | 0.60 | 0.02 | 0.38 | 0.50 |
| Krenouss<br>a | unmarked/ES40       | Retouched<br>Point | 2 | 0.79 | 0.00 | 0.02 | 0.19 | 0.00 | 0.34 |
| Krenouss<br>a | unmarked/ES41       | Retouched<br>Flake | 3 | 0.00 | 0.00 | 0.93 | 0.01 | 0.06 | 0.13 |
| Krenouss<br>a | unmarked/ES42       | Retouched<br>Point | 1 | 0.00 | 0.00 | 0.00 | 0.82 | 0.18 | 0.30 |
| Krenouss<br>a | unmarked/ES43       | Retouched<br>Flake | 5 | 0.00 | 0.00 | 0.47 | 0.03 | 0.50 | 0.53 |
| Krenouss<br>a | unmarked/ES44       | Retouched<br>Flake | 5 | 0.00 | 0.00 | 0.00 | 0.22 | 0.78 | 0.34 |
| Krenouss<br>a | unmarked/ES45       | Retouched<br>Blade | 3 | 0.00 | 0.00 | 0.99 | 0.00 | 0.01 | 0.02 |
| Krenouss<br>a | KRE311              | Retouched<br>Flake | 5 | 0.00 | 0.00 | 0.00 | 0.00 | 1.00 | 0.00 |
| Krenouss<br>a | KRE707              | Retouched<br>Flake | 1 | 0.00 | 0.00 | 0.00 | 0.93 | 0.07 | 0.13 |
| Krenouss<br>a | KRE410              | Retouched<br>Point | 1 | 0.00 | 0.00 | 0.49 | 0.51 | 0.01 | 0.50 |
| Krenouss<br>a | KRE249              | Retouched<br>Flake | 5 | 0.00 | 0.00 | 0.05 | 0.00 | 0.95 | 0.10 |
| Tabelbala     | Tabel 11P 1315-2 51 | Retouched<br>Point | 1 | 0.00 | 0.00 | 0.02 | 0.97 | 0.00 | 0.06 |
| Tabelbala     | Tabel a 1915-2 59   | Retouched<br>Point | 1 | 0.00 | 0.00 | 0.00 | 1.00 | 0.00 | 0.00 |
| Tabelbala     | Tabel a 1915-2 90   | Retouched<br>Point | 1 | 0.00 | 0.00 | 0.15 | 0.85 | 0.01 | 0.25 |
| Tabelbala     | 103                 | Retouched<br>Point | 1 | 0.00 | 0.00 | 0.00 | 1.00 | 0.00 | 0.00 |
| Tabelbala     | 105                 | Retouched<br>Point | 1 | 0.00 | 0.00 | 0.02 | 0.98 | 0.00 | 0.04 |
| Tabelbala     | 52                  | Retouched<br>Point | 1 | 0.00 | 0.00 | 0.10 | 0.89 | 0.01 | 0.20 |
| Tabelbala     | 569                 | Retouched<br>Point | 1 | 0.00 | 0.00 | 0.26 | 0.74 | 0.00 | 0.38 |
| Tabelbala     | 78                  | Retouched<br>Point | 1 | 0.00 | 0.00 | 0.24 | 0.66 | 0.10 | 0.50 |
| Tabelbala     | 49                  | Retouched<br>Point | 1 | 0.00 | 0.00 | 0.07 | 0.93 | 0.00 | 0.13 |
| Tabelbala     | 529                 | Retouched<br>Point | 1 | 0.00 | 0.00 | 0.22 | 0.78 | 0.00 | 0.34 |
| Tabelbala     | 27                  | Retouched<br>Point | 1 | 0.00 | 0.00 | 0.01 | 0.98 | 0.01 | 0.04 |
| Tabelbala     | 49                  | Retouched<br>Point | 1 | 0.00 | 0.00 | 0.11 | 0.87 | 0.02 | 0.23 |
| Tabelbala     | 51                  | Retouched<br>Point | 1 | 0.00 | 0.00 | 0.00 | 0.98 | 0.02 | 0.04 |

|           |                                       |                    |   |      |      |      |      |      |      |
|-----------|---------------------------------------|--------------------|---|------|------|------|------|------|------|
| Tabelbala | unmarked save for<br>Tabelbala 1915-2 | Retouched<br>Flake | 5 | 0.00 | 0.00 | 0.00 | 0.00 | 1.00 | 0.00 |
| Tabelbala | unmarked save for<br>Tabelbala 1915-2 | Retouched<br>Flake | 5 | 0.00 | 0.00 | 0.01 | 0.00 | 0.98 | 0.04 |
| Tabelbala | 98                                    | Retouched<br>Flake | 2 | 0.71 | 0.00 | 0.19 | 0.07 | 0.03 | 0.45 |
| Tabelbala | 90                                    | Retouched<br>Point | 1 | 0.00 | 0.00 | 0.00 | 1.00 | 0.00 | 0.00 |
| Tabelbala | 70                                    | Retouched<br>Point | 1 | 0.00 | 0.00 | 0.27 | 0.72 | 0.01 | 0.41 |
| Tabelbala | 85                                    | Retouched<br>Point | 1 | 0.00 | 0.00 | 0.00 | 1.00 | 0.00 | 0.00 |
| Tabelbala | illegible                             | Retouched<br>Flake | 3 | 0.00 | 0.00 | 0.78 | 0.03 | 0.19 | 0.35 |
| Tabelbala | 84                                    | Retouched<br>Point | 3 | 0.00 | 0.00 | 0.53 | 0.46 | 0.01 | 0.51 |
| Tabelbala | illegible                             | Retouched<br>Point | 1 | 0.00 | 0.00 | 0.03 | 0.97 | 0.00 | 0.06 |
| Tabelbala | 73                                    | Retouched<br>Point | 1 | 0.00 | 0.00 | 0.27 | 0.73 | 0.00 | 0.39 |
| Tabelbala | 72                                    | Retouched<br>Point | 3 | 0.00 | 0.00 | 0.55 | 0.45 | 0.00 | 0.50 |
| Tabelbala | 3                                     | Retouched<br>Flake | 5 | 0.00 | 0.00 | 0.00 | 0.00 | 1.00 | 0.00 |
| Tabelbala | 9                                     | Retouched<br>Blade | 2 | 0.70 | 0.00 | 0.23 | 0.07 | 0.00 | 0.45 |
| Tabelbala | 10                                    | Retouched<br>Point | 1 | 0.00 | 0.00 | 0.35 | 0.64 | 0.01 | 0.47 |
| Tabelbala | 8                                     | Retouched<br>Point | 1 | 0.02 | 0.00 | 0.00 | 0.98 | 0.00 | 0.04 |
| Tabelbala | illegible                             | Retouched<br>Point | 1 | 0.00 | 0.00 | 0.00 | 0.97 | 0.03 | 0.06 |
| Tabelbala | 1                                     | Retouched<br>Point | 3 | 0.00 | 0.00 | 0.78 | 0.21 | 0.01 | 0.35 |
| Tabelbala | 14                                    | Retouched<br>Flake | 1 | 0.00 | 0.00 | 0.01 | 0.99 | 0.00 | 0.02 |
| Tabelbala | unmarked                              | Retouched<br>Flake | 5 | 0.00 | 0.00 | 0.00 | 0.00 | 1.00 | 0.00 |
| Tabelbala | 13                                    | Retouched<br>Point | 3 | 0.23 | 0.00 | 0.42 | 0.34 | 0.01 | 0.66 |
| Tabelbala | 5                                     | Retouched<br>Flake | 3 | 0.00 | 0.00 | 0.90 | 0.09 | 0.01 | 0.18 |
| Tabelbala | 7                                     | Retouched<br>Point | 1 | 0.00 | 0.00 | 0.35 | 0.65 | 0.00 | 0.46 |
| Tabelbala | 12                                    | Retouched<br>Point | 1 | 0.00 | 0.00 | 0.02 | 0.97 | 0.00 | 0.06 |
| Tabelbala | 2                                     | Retouched<br>Blade | 3 | 0.00 | 0.00 | 0.89 | 0.11 | 0.00 | 0.20 |
| Tabelbala | 6                                     | Retouched<br>Point | 1 | 0.00 | 0.00 | 0.44 | 0.46 | 0.09 | 0.59 |
| Tabelbala | 15                                    | Retouched<br>Point | 3 | 0.00 | 0.00 | 0.96 | 0.03 | 0.00 | 0.08 |
| Tabelbala | unmarked                              | Retouched<br>Flake | 5 | 0.00 | 0.00 | 0.00 | 0.00 | 1.00 | 0.00 |

|           |                                                  |                     |   |      |      |      |      |      |      |
|-----------|--------------------------------------------------|---------------------|---|------|------|------|------|------|------|
| Tabelbala | 4                                                | Retouched<br>Flake  | 5 | 0.00 | 0.00 | 0.08 | 0.00 | 0.92 | 0.15 |
| Tabelbala | 225                                              | Retouched<br>Flake  | 1 | 0.00 | 0.00 | 0.31 | 0.68 | 0.01 | 0.44 |
| Tabelbala | 237                                              | Retouched<br>Point  | 1 | 0.00 | 0.00 | 0.00 | 1.00 | 0.00 | 0.00 |
| Tabelbala | Unmarked Bag 77<br>marked 'grattoir sur<br>lame' | Retouched<br>Flake  | 3 | 0.00 | 0.00 | 0.87 | 0.00 | 0.13 | 0.23 |
| Tabelbala | 247 Bag 76 marked<br>'grattoir pedoncule'        | Retouched<br>Point  | 1 | 0.00 | 0.00 | 0.07 | 0.93 | 0.00 | 0.13 |
| Tabelbala | Bag 71 marked grattoir                           | Retouched<br>Flake  | 5 | 0.00 | 0.00 | 0.00 | 0.00 | 1.00 | 0.00 |
| Tabelbala | Bag 75 marked grattoir<br>denticule              | Retouched<br>Flake  | 5 | 0.00 | 0.00 | 0.14 | 0.00 | 0.86 | 0.24 |
| Tabelbala | 602                                              | Retouched<br>Flake  | 1 | 0.00 | 0.00 | 0.00 | 0.94 | 0.06 | 0.11 |
| Tabelbala | 406                                              | Retouched<br>Flake  | 5 | 0.00 | 0.00 | 0.00 | 0.00 | 1.00 | 0.00 |
| Tabelbala | 154                                              | Retouched<br>Point  | 1 | 0.00 | 0.00 | 0.00 | 1.00 | 0.00 | 0.00 |
| Tabelbala | unmarked                                         | Bifacial<br>Foliate | 2 | 0.99 | 0.00 | 0.00 | 0.01 | 0.00 | 0.02 |
| Tabelbala | 60                                               | Retouched<br>Point  | 1 | 0.00 | 0.00 | 0.00 | 1.00 | 0.00 | 0.00 |
| Tabelbala | 54                                               | Retouched<br>Point  | 1 | 0.10 | 0.00 | 0.00 | 0.88 | 0.02 | 0.22 |
| Tabelbala | 55                                               | Retouched<br>Point  | 1 | 0.00 | 0.00 | 0.02 | 0.97 | 0.00 | 0.06 |
| Tabelbala | 450                                              | Retouched<br>Flake  | 1 | 0.00 | 0.00 | 0.00 | 1.00 | 0.00 | 0.00 |
| Tabelbala | 216                                              | Retouched<br>Point  | 1 | 0.00 | 0.00 | 0.10 | 0.90 | 0.00 | 0.18 |
| Tabelbala | 601                                              | Retouched<br>Point  | 1 | 0.00 | 0.00 | 0.30 | 0.69 | 0.01 | 0.43 |
| Tabelbala | 389                                              | Retouched<br>Flake  | 3 | 0.00 | 0.00 | 0.74 | 0.07 | 0.20 | 0.41 |
| Tabelbala | 230                                              | Retouched<br>Point  | 1 | 0.00 | 0.00 | 0.24 | 0.74 | 0.03 | 0.39 |
| Tabelbala | unmarked                                         | Retouched<br>Blade  | 3 | 0.00 | 0.00 | 1.00 | 0.00 | 0.00 | 0.00 |
| Tabelbala | unmarked                                         | Retouched<br>Flake  | 3 | 0.34 | 0.00 | 0.43 | 0.23 | 0.00 | 0.65 |
| Tabelbala | unmarked                                         | Retouched<br>Flake  | 3 | 0.00 | 0.00 | 0.90 | 0.09 | 0.01 | 0.18 |
| Tabelbala | 56                                               | Retouched<br>Point  | 1 | 0.00 | 0.00 | 0.00 | 0.97 | 0.03 | 0.06 |
| Tabelbala | unmarked                                         | Retouched<br>Flake  | 5 | 0.00 | 0.00 | 0.00 | 0.00 | 1.00 | 0.00 |
| Tabelbala | unmarked                                         | Retouched<br>Flake  | 3 | 0.00 | 0.00 | 1.00 | 0.00 | 0.00 | 0.00 |
| Tabelbala | 24                                               | Retouched<br>Flake  | 5 | 0.00 | 0.00 | 0.00 | 0.00 | 1.00 | 0.00 |

|           |          |                     |   |      |      |      |      |      |      |
|-----------|----------|---------------------|---|------|------|------|------|------|------|
| Tabelbala | 52       | Retouched<br>Flake  | 5 | 0.00 | 0.00 | 0.01 | 0.00 | 0.99 | 0.02 |
| Tabelbala | 176      | Retouched<br>Flake  | 1 | 0.00 | 0.00 | 0.00 | 0.74 | 0.26 | 0.38 |
| Tabelbala | unmarked | Levallois<br>Point  | 4 | 0.00 | 1.00 | 0.00 | 0.00 | 0.00 | 0.00 |
| Tabelbala | unmarked | Retouched<br>Blade  | 3 | 0.00 | 0.00 | 0.98 | 0.00 | 0.01 | 0.04 |
| Tabelbala | unmarked | Retouched<br>Flake  | 3 | 0.00 | 0.00 | 0.76 | 0.22 | 0.01 | 0.37 |
| Tabelbala | 47       | Retouched<br>Flake  | 5 | 0.00 | 0.00 | 0.00 | 0.00 | 1.00 | 0.00 |
| Tabelbala | 245      | Retouched<br>Flake  | 3 | 0.00 | 0.00 | 0.92 | 0.00 | 0.08 | 0.15 |
| Tabelbala | 50       | Retouched<br>Flake  | 5 | 0.00 | 0.00 | 0.00 | 0.00 | 1.00 | 0.00 |
| Tabelbala | unmarked | Retouched<br>Flake  | 1 | 0.00 | 0.00 | 0.24 | 0.75 | 0.01 | 0.38 |
| Tabelbala | unmarked | Retouched<br>Flake  | 5 | 0.00 | 0.00 | 0.33 | 0.00 | 0.67 | 0.44 |
| Tabelbala | unmarked | Retouched<br>Flake  | 5 | 0.00 | 0.00 | 0.37 | 0.00 | 0.63 | 0.47 |
| Tabelbala | unmarked | Retouched<br>Flake  | 5 | 0.00 | 0.00 | 0.00 | 0.00 | 1.00 | 0.00 |
| Tabelbala | unmarked | Retouched<br>Flake  | 5 | 0.00 | 0.00 | 0.06 | 0.00 | 0.94 | 0.11 |
| Tabelbala | unmarked | Retouched<br>Flake  | 5 | 0.00 | 0.00 | 0.40 | 0.00 | 0.60 | 0.48 |
| Tabelbala | unmarked | Bifacial<br>Foliate | 2 | 0.98 | 0.00 | 0.01 | 0.02 | 0.00 | 0.04 |
| Tabelbala | 53       | Retouched<br>Point  | 3 | 0.00 | 0.00 | 0.91 | 0.08 | 0.01 | 0.17 |
| Tabelbala | unmarked | Retouched<br>Flake  | 5 | 0.00 | 0.00 | 0.00 | 0.00 | 1.00 | 0.00 |
| Tabelbala | unmarked | Retouched<br>Flake  | 5 | 0.00 | 0.00 | 0.00 | 0.00 | 1.00 | 0.00 |
| Tabelbala | unmarked | Retouched<br>Flake  | 3 | 0.00 | 0.00 | 0.82 | 0.00 | 0.18 | 0.30 |
| Tabelbala | unmarked | Retouched<br>Flake  | 5 | 0.00 | 0.00 | 0.00 | 0.00 | 1.00 | 0.00 |
| Tabelbala | 243      | Retouched<br>Point  | 3 | 0.00 | 0.00 | 0.81 | 0.09 | 0.11 | 0.32 |
| Tabelbala | unmarked | Retouched<br>Flake  | 2 | 0.49 | 0.00 | 0.26 | 0.25 | 0.00 | 0.63 |
| Tabelbala | unmarked | Retouched<br>Flake  | 3 | 0.00 | 0.00 | 0.92 | 0.00 | 0.08 | 0.15 |
| Tabelbala | unmarked | Retouched<br>Flake  | 3 | 0.00 | 0.00 | 0.95 | 0.00 | 0.05 | 0.10 |
| Tabelbala | unmarked | Retouched<br>Flake  | 3 | 0.00 | 0.00 | 0.95 | 0.00 | 0.05 | 0.10 |
| Tabelbala | unmarked | Retouched<br>Blade  | 3 | 0.00 | 0.00 | 1.00 | 0.00 | 0.00 | 0.00 |
| Tabelbala | unmarked | Retouched<br>Flake  | 3 | 0.00 | 0.00 | 0.73 | 0.00 | 0.26 | 0.40 |

|           |           |                    |   |      |      |      |      |      |      |
|-----------|-----------|--------------------|---|------|------|------|------|------|------|
| Tabelbala | unmarked  | Retouched<br>Flake | 5 | 0.00 | 0.00 | 0.23 | 0.00 | 0.77 | 0.35 |
| Tabelbala | unmarked  | Retouched<br>Flake | 3 | 0.00 | 0.00 | 0.62 | 0.01 | 0.37 | 0.48 |
| Tabelbala | unmarked  | Retouched<br>Flake | 3 | 0.00 | 0.00 | 0.99 | 0.01 | 0.00 | 0.02 |
| Tabelbala | unmarked  | Retouched<br>Flake | 3 | 0.00 | 0.00 | 0.71 | 0.00 | 0.29 | 0.41 |
| Tabelbala | unmarked  | Retouched<br>Flake | 3 | 0.00 | 0.00 | 0.84 | 0.00 | 0.16 | 0.27 |
| Tabelbala | unmarked  | Retouched<br>Flake | 5 | 0.00 | 0.00 | 0.12 | 0.00 | 0.88 | 0.21 |
| Tabelbala | unmarked  | Retouched<br>Flake | 3 | 0.00 | 0.00 | 0.67 | 0.00 | 0.33 | 0.44 |
| Tabelbala | unmarked  | Retouched<br>Flake | 3 | 0.00 | 0.00 | 0.94 | 0.00 | 0.06 | 0.11 |
| Tabelbala | illegible | Retouched<br>Flake | 3 | 0.00 | 0.00 | 0.98 | 0.00 | 0.01 | 0.04 |
| Tabelbala | unmarked  | Retouched<br>Flake | 5 | 0.00 | 0.00 | 0.11 | 0.00 | 0.89 | 0.20 |
| Tabelbala | unmarked  | Retouched<br>Flake | 2 | 0.86 | 0.00 | 0.02 | 0.12 | 0.00 | 0.25 |
| Tabelbala | unmarked  | Retouched<br>Flake | 3 | 0.00 | 0.00 | 0.84 | 0.00 | 0.16 | 0.27 |
| Tabelbala | unmarked  | Retouched<br>Flake | 5 | 0.00 | 0.00 | 0.00 | 0.00 | 1.00 | 0.00 |
| Tabelbala | unmarked  | Retouched<br>Flake | 5 | 0.00 | 0.00 | 0.00 | 0.00 | 1.00 | 0.00 |
| Tabelbala | unmarked  | Retouched<br>Flake | 3 | 0.00 | 0.00 | 0.71 | 0.00 | 0.29 | 0.41 |
| Tabelbala | unmarked  | Retouched<br>Flake | 3 | 0.00 | 0.00 | 0.97 | 0.00 | 0.03 | 0.06 |
| Tabelbala | unmarked  | Retouched<br>Flake | 3 | 0.00 | 0.00 | 0.89 | 0.03 | 0.08 | 0.20 |
| Tabelbala | unmarked  | Retouched<br>Flake | 5 | 0.00 | 0.00 | 0.21 | 0.00 | 0.79 | 0.33 |
| Tabelbala | unmarked  | Retouched<br>Flake | 3 | 0.00 | 0.00 | 0.95 | 0.00 | 0.05 | 0.10 |
| Tabelbala | unmarked  | Retouched<br>Flake | 5 | 0.00 | 0.00 | 0.00 | 0.00 | 1.00 | 0.00 |
| Tabelbala | unmarked  | Retouched<br>Flake | 5 | 0.00 | 0.00 | 0.11 | 0.00 | 0.89 | 0.20 |
| Tabelbala | unmarked  | Retouched<br>Flake | 2 | 0.92 | 0.00 | 0.07 | 0.00 | 0.00 | 0.15 |
| Tabelbala | unmarked  | Retouched<br>Flake | 3 | 0.00 | 0.00 | 0.83 | 0.13 | 0.05 | 0.29 |
| Tabelbala | unmarked  | Retouched<br>Flake | 3 | 0.00 | 0.00 | 0.89 | 0.00 | 0.11 | 0.20 |
| Tabelbala | unmarked  | Retouched<br>Flake | 5 | 0.00 | 0.00 | 0.00 | 0.00 | 1.00 | 0.00 |
| Tabelbala | unmarked  | Retouched<br>Flake | 3 | 0.00 | 0.00 | 0.99 | 0.00 | 0.01 | 0.02 |
| Tabelbala | unmarked  | Retouched<br>Flake | 2 | 0.67 | 0.00 | 0.28 | 0.00 | 0.05 | 0.47 |

|           |          |                    |   |      |      |      |      |      |      |
|-----------|----------|--------------------|---|------|------|------|------|------|------|
| Tabelbala | unmarked | Retouched<br>Flake | 3 | 0.00 | 0.00 | 0.85 | 0.11 | 0.04 | 0.26 |
| Tabelbala | unmarked | Retouched<br>Flake | 3 | 0.00 | 0.00 | 0.60 | 0.01 | 0.39 | 0.49 |
| Tabelbala | unmarked | Retouched<br>Flake | 1 | 0.00 | 0.00 | 0.00 | 0.97 | 0.03 | 0.06 |
| Tabelbala | unmarked | Retouched<br>Blade | 3 | 0.00 | 0.00 | 0.96 | 0.04 | 0.00 | 0.08 |
| Tabelbala | unmarked | Retouched<br>Blade | 3 | 0.00 | 0.00 | 1.00 | 0.00 | 0.00 | 0.00 |
| Tabelbala | 38       | Retouched<br>Flake | 1 | 0.00 | 0.00 | 0.13 | 0.85 | 0.02 | 0.26 |
| Tabelbala | 22       | Retouched<br>Flake | 3 | 0.00 | 0.00 | 0.81 | 0.00 | 0.19 | 0.31 |
| Tabelbala | 80       | Retouched<br>Point | 3 | 0.00 | 0.00 | 0.73 | 0.24 | 0.03 | 0.41 |
| Tabelbala | 78       | Retouched<br>Point | 1 | 0.00 | 0.00 | 0.00 | 1.00 | 0.00 | 0.00 |
| Tabelbala | 72       | Retouched<br>Point | 1 | 0.00 | 0.00 | 0.00 | 0.99 | 0.01 | 0.02 |
| Tabelbala | 176      | Retouched<br>Point | 1 | 0.00 | 0.00 | 0.06 | 0.94 | 0.00 | 0.11 |
| Tabelbala | unmarked | Retouched<br>Point | 2 | 0.92 | 0.00 | 0.00 | 0.07 | 0.00 | 0.15 |
| Tabelbala | 192      | Retouched<br>Point | 1 | 0.00 | 0.00 | 0.01 | 0.99 | 0.00 | 0.02 |
| Tabelbala | 135      | Retouched<br>Point | 1 | 0.00 | 0.00 | 0.00 | 1.00 | 0.00 | 0.00 |
| Tabelbala | 153      | Retouched<br>Point | 1 | 0.00 | 0.00 | 0.01 | 0.98 | 0.01 | 0.04 |
| Tabelbala | 140      | Retouched<br>Point | 1 | 0.00 | 0.00 | 0.03 | 0.97 | 0.00 | 0.06 |
| Tabelbala | 143      | Retouched<br>Point | 1 | 0.00 | 0.00 | 0.02 | 0.98 | 0.00 | 0.04 |
| Tabelbala | 171      | Retouched<br>Point | 1 | 0.00 | 0.00 | 0.00 | 1.00 | 0.00 | 0.00 |
| Tabelbala | 168      | Retouched<br>Point | 1 | 0.00 | 0.00 | 0.10 | 0.90 | 0.00 | 0.18 |
| Tabelbala | 28       | Retouched<br>Point | 1 | 0.00 | 0.00 | 0.00 | 0.93 | 0.07 | 0.13 |
| Tabelbala | 76       | Retouched<br>Flake | 1 | 0.00 | 0.00 | 0.07 | 0.93 | 0.00 | 0.13 |
| Tabelbala | 17       | Retouched<br>Flake | 1 | 0.00 | 0.00 | 0.44 | 0.55 | 0.00 | 0.50 |
| Tabelbala | 23       | Retouched<br>Point | 1 | 0.00 | 0.00 | 0.09 | 0.91 | 0.00 | 0.16 |
| Tabelbala | 24       | Retouched<br>Blade | 3 | 0.09 | 0.00 | 0.75 | 0.15 | 0.00 | 0.41 |
| Tabelbala | 22       | Retouched<br>Point | 3 | 0.00 | 0.00 | 0.56 | 0.03 | 0.41 | 0.52 |
| Tabelbala | 20       | Retouched<br>Blade | 1 | 0.02 | 0.00 | 0.48 | 0.50 | 0.00 | 0.52 |
| Tabelbala | 577      | Retouched<br>Flake | 1 | 0.00 | 0.00 | 0.00 | 0.91 | 0.09 | 0.16 |

|               |           |                 |   |      |      |      |      |      |      |
|---------------|-----------|-----------------|---|------|------|------|------|------|------|
| Tabelbala     | 586       | Retouched Point | 1 | 0.00 | 0.00 | 0.00 | 0.98 | 0.02 | 0.04 |
| Tabelbala     | 350       | Retouched Point | 1 | 0.00 | 0.00 | 0.07 | 0.93 | 0.00 | 0.13 |
| Tabelbala     | 545       | Retouched Flake | 1 | 0.00 | 0.00 | 0.37 | 0.63 | 0.00 | 0.47 |
| Tabelbala     | 213       | Retouched Point | 1 | 0.00 | 0.00 | 0.03 | 0.97 | 0.00 | 0.06 |
| Tabelbala     | unmarked  | Retouched Flake | 5 | 0.00 | 0.00 | 0.26 | 0.03 | 0.71 | 0.43 |
| Tabelbala     | 353       | Retouched Point | 3 | 0.00 | 0.00 | 1.00 | 0.00 | 0.00 | 0.00 |
| Tabelbala     | 345       | Retouched Point | 1 | 0.00 | 0.00 | 0.00 | 1.00 | 0.00 | 0.00 |
| Tabelbala     | 332       | Retouched Point | 1 | 0.00 | 0.00 | 0.00 | 1.00 | 0.00 | 0.00 |
| Tabelbala     | 446       | Retouched Flake | 1 | 0.00 | 0.00 | 0.06 | 0.94 | 0.00 | 0.11 |
| Tabelbala     | 425       | Retouched Flake | 1 | 0.00 | 0.00 | 0.00 | 1.00 | 0.00 | 0.00 |
| Tabelbala     | 433       | Retouched Point | 3 | 0.00 | 0.00 | 0.69 | 0.30 | 0.00 | 0.43 |
| Tabelbala     | 442       | Retouched Point | 1 | 0.00 | 0.00 | 0.15 | 0.85 | 0.01 | 0.25 |
| Tabelbala     | 432       | Retouched Point | 1 | 0.00 | 0.00 | 0.02 | 0.97 | 0.02 | 0.06 |
| Tabelbala     | 407       | Retouched Flake | 1 | 0.00 | 0.00 | 0.04 | 0.77 | 0.19 | 0.37 |
| Tabelbala     | 404       | Retouched Flake | 5 | 0.00 | 0.00 | 0.00 | 0.14 | 0.86 | 0.24 |
| Oued Djebbana | TSAa15330 | Retouched Flake | 1 | 0.00 | 0.00 | 0.19 | 0.59 | 0.22 | 0.57 |
| Oued Djebbana | TSA29957  | Retouched Flake | 3 | 0.00 | 0.00 | 0.75 | 0.24 | 0.02 | 0.38 |
| Oued Djebbana | TSAb12351 | Retouched Flake | 1 | 0.00 | 0.00 | 0.11 | 0.87 | 0.02 | 0.23 |
| Oued Djebbana | TSAb15245 | Retouched Flake | 1 | 0.00 | 0.00 | 0.06 | 0.84 | 0.10 | 0.28 |
| Oued Djebbana | TSA49906  | Retouched Flake | 5 | 0.00 | 0.00 | 0.02 | 0.00 | 0.98 | 0.04 |
| Oued Djebbana | TSA49932  | Retouched Flake | 5 | 0.00 | 0.00 | 0.00 | 0.00 | 1.00 | 0.00 |
| Oued Djebbana | TSAb15066 | Retouched Flake | 5 | 0.00 | 0.00 | 0.21 | 0.22 | 0.57 | 0.58 |
| Oued Djebbana | TSAb3033  | Retouched Flake | 5 | 0.00 | 0.00 | 0.00 | 0.02 | 0.98 | 0.04 |
| Oued Djebbana | TSA29967  | Retouched Blade | 3 | 0.00 | 0.00 | 0.68 | 0.32 | 0.00 | 0.44 |
| Oued Djebbana | TSAb12353 | Retouched Flake | 3 | 0.00 | 0.00 | 0.89 | 0.00 | 0.11 | 0.20 |
| Oued Djebbana | TSAb3023  | Retouched Flake | 1 | 0.00 | 0.00 | 0.00 | 0.97 | 0.03 | 0.06 |
| Oued Djebbana | TSAb3036  | Retouched Flake | 5 | 0.00 | 0.00 | 0.00 | 0.00 | 1.00 | 0.00 |

|                  |                                           |                    |   |      |      |      |      |      |      |
|------------------|-------------------------------------------|--------------------|---|------|------|------|------|------|------|
| Oued<br>Djebbana | TSAb3024                                  | Retouched<br>Blade | 1 | 0.00 | 0.00 | 0.44 | 0.56 | 0.00 | 0.49 |
| Oued<br>Djebbana | TSAb50564                                 | Retouched<br>Flake | 5 | 0.00 | 0.00 | 0.39 | 0.00 | 0.60 | 0.49 |
| Oued<br>Djebbana | TSA95538                                  | Retouched<br>Flake | 3 | 0.00 | 0.00 | 0.83 | 0.08 | 0.09 | 0.30 |
| Oued<br>Djebbana | TSA29420                                  | Retouched<br>Flake | 5 | 0.00 | 0.00 | 0.01 | 0.42 | 0.56 | 0.51 |
| Oued<br>Djebbana | TSA29972                                  | Retouched<br>Flake | 1 | 0.00 | 0.00 | 0.00 | 0.78 | 0.22 | 0.34 |
| Oued<br>Djebbana | TSAa15337                                 | Retouched<br>Flake | 3 | 0.00 | 0.00 | 0.88 | 0.11 | 0.00 | 0.21 |
| Oued<br>Djebbana | TSA29423                                  | Retouched<br>Flake | 5 | 0.00 | 0.00 | 0.01 | 0.37 | 0.61 | 0.49 |
| Oued<br>Djebbana | TS4428                                    | Retouched<br>Flake | 3 | 0.00 | 0.00 | 0.97 | 0.03 | 0.00 | 0.06 |
| Oued<br>Djebbana | TSAb3083 From<br>Mousterian Points Bag    | Retouched<br>Point | 3 | 0.00 | 0.00 | 0.80 | 0.18 | 0.02 | 0.33 |
| Oued<br>Djebbana | TSAb15242 From<br>Mousterian Points Bag   | Retouched<br>Point | 1 | 0.00 | 0.00 | 0.00 | 1.00 | 0.00 | 0.00 |
| Oued<br>Djebbana | TSAb3071                                  | Retouched<br>Point | 1 | 0.00 | 0.00 | 0.00 | 1.00 | 0.00 | 0.00 |
| Oued<br>Djebbana | TSA41990<br>From Mousterian<br>Points Bag | Retouched<br>Point | 1 | 0.00 | 0.00 | 0.00 | 0.98 | 0.02 | 0.04 |
| Oued<br>Djebbana | TSA50870 From<br>Mousterian Points Bag    | Retouched<br>Point | 1 | 0.00 | 0.00 | 0.13 | 0.85 | 0.02 | 0.26 |
| Oued<br>Djebbana | TSA42065 From<br>Nosed Scrapers Bag       | Retouched<br>Flake | 3 | 0.00 | 0.00 | 0.92 | 0.07 | 0.01 | 0.15 |
| Oued<br>Djebbana | TSA42064 From<br>Nosed Scrapers Bag       | Retouched<br>Flake | 1 | 0.00 | 0.00 | 0.40 | 0.50 | 0.10 | 0.58 |
| Oued<br>Djebbana | TSA49904 From<br>Nosed Scrapers Bag       | Retouched<br>Flake | 3 | 0.00 | 0.00 | 0.95 | 0.05 | 0.00 | 0.10 |
| Oued<br>Djebbana | TSA29382 From<br>Nosed Scrapers Bag       | Retouched<br>Flake | 3 | 0.00 | 0.00 | 0.53 | 0.16 | 0.31 | 0.60 |
| Oued<br>Djebbana | TSAb15252 From<br>Nosed Scrapers Bag      | Retouched<br>Flake | 3 | 0.00 | 0.00 | 0.77 | 0.00 | 0.23 | 0.35 |
| Oued<br>Djebbana | TSA49908 From<br>Nosed Scrapers Bag       | Retouched<br>Flake | 1 | 0.00 | 0.00 | 0.31 | 0.68 | 0.01 | 0.44 |
| Oued<br>Djebbana | TSAb15282 From<br>Nosed Scrapers Bag      | Retouched<br>Flake | 1 | 0.00 | 0.00 | 0.01 | 0.93 | 0.06 | 0.13 |
| Oued<br>Djebbana | TSAb50565                                 | Retouched<br>Blade | 3 | 0.00 | 0.00 | 0.87 | 0.00 | 0.13 | 0.23 |
| Oued<br>Djebbana | TSAb3052                                  | Retouched<br>Flake | 5 | 0.00 | 0.00 | 0.20 | 0.00 | 0.80 | 0.32 |
| Bir<br>Chaacha   | 28.561                                    | Retouched<br>Flake | 1 | 0.00 | 0.00 | 0.00 | 0.96 | 0.04 | 0.08 |
| Bir<br>Chaacha   | 4804                                      | Retouched<br>Flake | 5 | 0.00 | 0.00 | 0.00 | 0.00 | 1.00 | 0.00 |
| Bir<br>Chaacha   | 28562                                     | Retouched<br>Point | 1 | 0.00 | 0.00 | 0.07 | 0.92 | 0.01 | 0.15 |
| Bir<br>Chaacha   | 28578                                     | Retouched<br>Flake | 1 | 0.00 | 0.00 | 0.30 | 0.68 | 0.02 | 0.45 |

|                |       |                     |   |      |      |      |      |      |      |
|----------------|-------|---------------------|---|------|------|------|------|------|------|
| Bir<br>Chaacha | 28568 | Retouched<br>Point  | 1 | 0.00 | 0.00 | 0.00 | 1.00 | 0.00 | 0.00 |
| Bir<br>Chaacha | 4808  | Retouched<br>Point  | 1 | 0.00 | 0.00 | 0.38 | 0.61 | 0.00 | 0.48 |
| Bir<br>Chaacha | 4818  | Retouched<br>Flake  | 3 | 0.00 | 0.00 | 0.97 | 0.01 | 0.02 | 0.06 |
| Bir<br>Chaacha | 28573 | Retouched<br>Point  | 1 | 0.26 | 0.00 | 0.33 | 0.39 | 0.02 | 0.67 |
| Bir<br>Chaacha | 4817  | Retouched<br>Point  | 3 | 0.00 | 0.00 | 0.56 | 0.43 | 0.01 | 0.50 |
| Bir<br>Chaacha | 4811  | Retouched<br>Point  | 1 | 0.00 | 0.00 | 0.11 | 0.89 | 0.00 | 0.20 |
| Bir<br>Chaacha | 4214  | Retouched<br>Point  | 3 | 0.00 | 0.00 | 0.97 | 0.03 | 0.00 | 0.06 |
| Bir<br>Chaacha | 4859  | Retouched<br>Flake  | 3 | 0.00 | 0.00 | 0.93 | 0.06 | 0.01 | 0.13 |
| Bir<br>Chaacha | 4816  | Retouched<br>Flake  | 3 | 0.00 | 0.00 | 0.50 | 0.40 | 0.10 | 0.58 |
| Bir<br>Chaacha | 31143 | Retouched<br>Point  | 1 | 0.00 | 0.00 | 0.02 | 0.97 | 0.00 | 0.06 |
| Bir<br>Chaacha | 28563 | Retouched<br>Flake  | 1 | 0.00 | 0.00 | 0.19 | 0.81 | 0.00 | 0.31 |
| Bir<br>Chaacha | 4815  | Retouched<br>Point  | 3 | 0.00 | 0.00 | 0.61 | 0.38 | 0.01 | 0.48 |
| Bir<br>Chaacha | 4806  | Retouched<br>Point  | 3 | 0.00 | 0.00 | 0.61 | 0.38 | 0.01 | 0.48 |
| Bir<br>Chaacha | 4809  | Retouched<br>Point  | 3 | 0.00 | 0.00 | 0.98 | 0.02 | 0.00 | 0.04 |
| Bir<br>Chaacha | 4812  | Retouched<br>Flake  | 3 | 0.00 | 0.00 | 0.81 | 0.13 | 0.06 | 0.32 |
| Bir<br>Chaacha | 28585 | Retouched<br>Flake  | 5 | 0.00 | 0.00 | 0.22 | 0.00 | 0.78 | 0.34 |
| Bir<br>Chaacha | 28593 | Retouched<br>Flake  | 2 | 0.48 | 0.00 | 0.45 | 0.04 | 0.03 | 0.56 |
| Bir<br>Chaacha | 4805  | Retouched<br>Flake  | 5 | 0.00 | 0.00 | 0.26 | 0.03 | 0.71 | 0.43 |
| Bir<br>Chaacha | 28569 | Retouched<br>Flake  | 3 | 0.00 | 0.00 | 0.98 | 0.01 | 0.01 | 0.04 |
| Bir<br>Chaacha | 28595 | Retouched<br>Flake  | 3 | 0.00 | 0.00 | 0.93 | 0.00 | 0.07 | 0.13 |
| Bir<br>Chaacha | 33716 | Retouched<br>Flake  | 3 | 0.01 | 0.00 | 0.52 | 0.00 | 0.47 | 0.51 |
| Bir<br>Chaacha | 4810  | Retouched<br>Flake  | 3 | 0.00 | 0.00 | 0.96 | 0.03 | 0.00 | 0.08 |
| Bir<br>Chaacha | 77194 | Biface              | 3 | 0.01 | 0.02 | 0.56 | 0.40 | 0.00 | 0.53 |
| Bir<br>Chaacha | 31182 | Retouched<br>Blade  | 3 | 0.00 | 0.00 | 1.00 | 0.00 | 0.00 | 0.00 |
| Bir<br>Chaacha | 31223 | Bifacial<br>Foliate | 2 | 0.95 | 0.00 | 0.01 | 0.02 | 0.03 | 0.10 |
| Bir<br>Chaacha | 4844  | Bifacial<br>Foliate | 2 | 0.95 | 0.00 | 0.01 | 0.02 | 0.03 | 0.10 |
| Bir<br>Chaacha | 77196 | Retouched<br>Flake  | 3 | 0.00 | 0.00 | 0.97 | 0.00 | 0.03 | 0.06 |

|                |       |                    |   |      |      |      |      |      |      |
|----------------|-------|--------------------|---|------|------|------|------|------|------|
| Bir<br>Chaacha | 4901  | Retouched<br>Flake | 5 | 0.00 | 0.00 | 0.21 | 0.00 | 0.79 | 0.33 |
| Bir<br>Chaacha | 31183 | Retouched<br>Blade | 3 | 0.00 | 0.00 | 0.98 | 0.02 | 0.00 | 0.04 |
| Bir<br>Chaacha | 4198  | Retouched<br>Blade | 3 | 0.00 | 0.00 | 1.00 | 0.00 | 0.00 | 0.00 |
| Bir<br>Chaacha | 4869  | Retouched<br>Flake | 5 | 0.00 | 0.00 | 0.00 | 0.01 | 0.99 | 0.02 |
| Bir<br>Chaacha | 4888  | Retouched<br>Flake | 5 | 0.00 | 0.00 | 0.00 | 0.00 | 1.00 | 0.00 |
| Bir<br>Chaacha | 31151 | Retouched<br>Flake | 3 | 0.00 | 0.00 | 0.49 | 0.04 | 0.47 | 0.54 |
| Bir<br>Chaacha | 28602 | Retouched<br>Flake | 3 | 0.00 | 0.00 | 0.80 | 0.18 | 0.02 | 0.33 |
| Bir<br>Chaacha | 31305 | Retouched<br>Flake | 3 | 0.00 | 0.00 | 0.55 | 0.44 | 0.00 | 0.50 |
| Bir<br>Chaacha | 4866  | Retouched<br>Flake | 3 | 0.00 | 0.00 | 0.99 | 0.00 | 0.00 | 0.02 |
| Bir<br>Chaacha | 33721 | Retouched<br>Flake | 3 | 0.00 | 0.00 | 0.88 | 0.11 | 0.00 | 0.21 |
| Bir<br>Chaacha | 4853  | Retouched<br>Point | 5 | 0.00 | 0.00 | 0.00 | 0.00 | 1.00 | 0.00 |
| Bir<br>Chaacha | 28622 | Retouched<br>Point | 1 | 0.00 | 0.00 | 0.01 | 0.98 | 0.01 | 0.04 |
| Bir<br>Chaacha | 31154 | Retouched<br>Flake | 3 | 0.00 | 0.00 | 0.84 | 0.00 | 0.16 | 0.27 |
| Bir<br>Chaacha | 4913  | Retouched<br>Flake | 5 | 0.00 | 0.00 | 0.40 | 0.04 | 0.56 | 0.52 |
| Bir<br>Chaacha | 4870  | Retouched<br>Flake | 5 | 0.00 | 0.00 | 0.03 | 0.03 | 0.94 | 0.11 |
| Bir<br>Chaacha | 31242 | Retouched<br>Flake | 3 | 0.00 | 0.00 | 0.87 | 0.00 | 0.13 | 0.23 |
| Bir<br>Chaacha | 31185 | Retouched<br>Flake | 3 | 0.00 | 0.00 | 0.94 | 0.01 | 0.05 | 0.11 |
| Bir<br>Chaacha | 4885  | Retouched<br>Flake | 3 | 0.00 | 0.00 | 0.62 | 0.02 | 0.37 | 0.48 |
| Bir<br>Chaacha | 4873  | Retouched<br>Flake | 1 | 0.00 | 0.00 | 0.29 | 0.52 | 0.19 | 0.61 |
| Bir<br>Chaacha | 4916  | Retouched<br>Blade | 1 | 0.00 | 0.00 | 0.00 | 0.99 | 0.01 | 0.02 |
| Bir<br>Chaacha | 33733 | Retouched<br>Flake | 1 | 0.00 | 0.00 | 0.24 | 0.74 | 0.03 | 0.39 |
| Bir<br>Chaacha | 4855  | Retouched<br>Flake | 3 | 0.00 | 0.00 | 0.57 | 0.42 | 0.01 | 0.50 |
| Bir<br>Chaacha | 31236 | Retouched<br>Flake | 3 | 0.00 | 0.00 | 0.84 | 0.00 | 0.15 | 0.27 |
| Bir<br>Chaacha | 4881  | Retouched<br>Flake | 3 | 0.00 | 0.00 | 0.96 | 0.02 | 0.02 | 0.08 |
| Bir<br>Chaacha | 4852  | Retouched<br>Flake | 3 | 0.00 | 0.00 | 0.97 | 0.00 | 0.03 | 0.06 |
| Bir<br>Chaacha | 31283 | Retouched<br>Flake | 5 | 0.00 | 0.00 | 0.00 | 0.00 | 1.00 | 0.00 |
| Bir<br>Chaacha | 4859  | Retouched<br>Flake | 3 | 0.00 | 0.00 | 0.99 | 0.01 | 0.01 | 0.02 |

|                      |               |                     |   |      |      |      |      |      |      |
|----------------------|---------------|---------------------|---|------|------|------|------|------|------|
| Bir<br>Chaacha       | 33747         | Retouched<br>Flake  | 3 | 0.00 | 0.00 | 0.84 | 0.06 | 0.10 | 0.28 |
| Bir<br>Chaacha       | 4842          | Bifacial<br>Foliate | 2 | 0.95 | 0.00 | 0.00 | 0.04 | 0.00 | 0.10 |
| Bir<br>Chaacha       | 31261         | Retouched<br>Flake  | 2 | 0.90 | 0.00 | 0.02 | 0.06 | 0.02 | 0.19 |
| Bir<br>Chaacha       | 31227         | Retouched<br>Flake  | 3 | 0.03 | 0.00 | 0.69 | 0.00 | 0.28 | 0.44 |
| Bir<br>Chaacha       | 31244         | Retouched<br>Flake  | 1 | 0.00 | 0.00 | 0.32 | 0.67 | 0.01 | 0.45 |
| Bir<br>Chaacha       | 31169         | Retouched<br>Flake  | 3 | 0.00 | 0.00 | 0.88 | 0.10 | 0.02 | 0.22 |
| Bir<br>Chaacha       | 31150         | Retouched<br>Flake  | 1 | 0.46 | 0.00 | 0.01 | 0.51 | 0.01 | 0.53 |
| Bir<br>Chaacha       | 4867          | Retouched<br>Flake  | 2 | 0.64 | 0.00 | 0.04 | 0.31 | 0.00 | 0.49 |
| Bir<br>Chaacha       | 4868          | Retouched<br>Flake  | 2 | 0.76 | 0.00 | 0.06 | 0.18 | 0.00 | 0.39 |
| Bir<br>Chaacha       | 33723         | Retouched<br>Flake  | 3 | 0.00 | 0.00 | 0.88 | 0.10 | 0.02 | 0.22 |
| Bir<br>Chaacha       | 31162         | Retouched<br>Flake  | 3 | 0.00 | 0.00 | 0.94 | 0.05 | 0.01 | 0.11 |
| Bir<br>Chaacha       | 3115          | Retouched<br>Flake  | 3 | 0.00 | 0.00 | 1.00 | 0.00 | 0.00 | 0.00 |
| Bir<br>Chaacha       | 31148         | Retouched<br>Flake  | 1 | 0.00 | 0.00 | 0.11 | 0.87 | 0.02 | 0.23 |
| Bir<br>Chaacha       | 4874          | Retouched<br>Flake  | 3 | 0.00 | 0.00 | 0.88 | 0.10 | 0.02 | 0.22 |
| Bir<br>Chaacha       | 31234         | Retouched<br>Flake  | 3 | 0.00 | 0.00 | 0.98 | 0.00 | 0.02 | 0.04 |
| Bir<br>Chaacha       | 31287         | Retouched<br>Flake  | 5 | 0.00 | 0.00 | 0.00 | 0.00 | 1.00 | 0.00 |
| Bir<br>Chaacha       | 4903          | Retouched<br>Flake  | 3 | 0.00 | 0.00 | 0.89 | 0.03 | 0.08 | 0.20 |
| Bir<br>Chaacha       | 33726         | Retouched<br>Flake  | 5 | 0.00 | 0.00 | 0.36 | 0.00 | 0.64 | 0.46 |
| Bir<br>Chaacha       | 31152         | Retouched<br>Flake  | 3 | 0.00 | 0.00 | 0.69 | 0.14 | 0.17 | 0.48 |
| Bir<br>Chaacha       | 33740         | Retouched<br>Flake  | 2 | 0.80 | 0.00 | 0.04 | 0.16 | 0.00 | 0.33 |
| Mugharet<br>el Aliya | 39.69.50/4643 | Retouched<br>Flake  | 5 | 0.00 | 0.00 | 0.00 | 0.12 | 0.88 | 0.21 |
| Mugharet<br>el Aliya | "             | Retouched<br>Flake  | 5 | 0.00 | 0.00 | 0.00 | 0.00 | 1.00 | 0.00 |
| Mugharet<br>el Aliya | "             | Retouched<br>Flake  | 5 | 0.00 | 0.00 | 0.05 | 0.00 | 0.95 | 0.10 |
| Mugharet<br>el Aliya | 4644          | Retouched<br>Flake  | 1 | 0.00 | 0.00 | 0.14 | 0.75 | 0.11 | 0.41 |
| Mugharet<br>el Aliya | "             | Retouched<br>Flake  | 2 | 0.88 | 0.00 | 0.00 | 0.02 | 0.10 | 0.22 |
| Mugharet<br>el Aliya | "             | Retouched<br>Flake  | 2 | 0.98 | 0.00 | 0.00 | 0.01 | 0.01 | 0.04 |
| Mugharet<br>el Aliya | 5466          | Retouched<br>Flake  | 5 | 0.00 | 0.00 | 0.02 | 0.00 | 0.98 | 0.04 |

|                   |      |                  |   |      |      |      |      |      |      |
|-------------------|------|------------------|---|------|------|------|------|------|------|
| Mugharet el Aliya | 5490 | Retouched Flake  | 1 | 0.00 | 0.00 | 0.00 | 0.90 | 0.10 | 0.18 |
| Mugharet el Aliya | "    | Retouched Flake  | 5 | 0.00 | 0.00 | 0.00 | 0.33 | 0.67 | 0.44 |
| Mugharet el Aliya | 5508 | Retouched Flake  | 5 | 0.00 | 0.00 | 0.00 | 0.00 | 1.00 | 0.00 |
| Mugharet el Aliya | 5478 | Retouched Flake  | 2 | 0.89 | 0.00 | 0.00 | 0.04 | 0.07 | 0.20 |
| Mugharet el Aliya | 5489 | Retouched Flake  | 2 | 0.93 | 0.00 | 0.00 | 0.06 | 0.02 | 0.13 |
| Mugharet el Aliya | 5479 | Retouched Flake  | 5 | 0.00 | 0.00 | 0.00 | 0.07 | 0.93 | 0.13 |
| Mugharet el Aliya | 5468 | Retouched Flake  | 1 | 0.00 | 0.00 | 0.00 | 0.99 | 0.01 | 0.02 |
| Mugharet el Aliya | 4628 | Retouched Point  | 1 | 0.00 | 0.00 | 0.00 | 0.89 | 0.11 | 0.20 |
| Mugharet el Aliya | 4644 | Retouched Flake  | 1 | 0.09 | 0.00 | 0.00 | 0.88 | 0.04 | 0.22 |
| Mugharet el Aliya | "    | Retouched Flake  | 5 | 0.00 | 0.00 | 0.00 | 0.00 | 1.00 | 0.00 |
| Mugharet el Aliya | "    | Retouched Flake  | 5 | 0.00 | 0.00 | 0.00 | 0.00 | 1.00 | 0.00 |
| Mugharet el Aliya | 4628 | Retouched Flake  | 5 | 0.00 | 0.00 | 0.00 | 0.00 | 1.00 | 0.00 |
| Mugharet el Aliya | 4648 | Bifacial Foliate | 2 | 0.97 | 0.00 | 0.00 | 0.00 | 0.03 | 0.06 |
| Mugharet el Aliya | 5477 | Retouched Flake  | 1 | 0.00 | 0.00 | 0.00 | 0.63 | 0.37 | 0.47 |
| Mugharet el Aliya | 5478 | Retouched Flake  | 2 | 0.75 | 0.00 | 0.00 | 0.00 | 0.25 | 0.38 |
| Mugharet el Aliya | 5489 | Retouched Flake  | 5 | 0.00 | 0.00 | 0.00 | 0.00 | 1.00 | 0.00 |
| Mugharet el Aliya | 5506 | Retouched Flake  | 5 | 0.00 | 0.00 | 0.11 | 0.16 | 0.73 | 0.43 |
| Mugharet el Aliya | 5478 | Retouched Flake  | 5 | 0.00 | 0.00 | 0.00 | 0.46 | 0.54 | 0.50 |
| Mugharet el Aliya | 5465 | Retouched Flake  | 3 | 0.00 | 0.00 | 0.68 | 0.22 | 0.10 | 0.48 |
| Mugharet el Aliya | 5478 | Retouched Flake  | 5 | 0.00 | 0.00 | 0.00 | 0.00 | 1.00 | 0.00 |
| Mugharet el Aliya | 5483 | Retouched Flake  | 5 | 0.00 | 0.00 | 0.34 | 0.01 | 0.65 | 0.46 |
| Mugharet el Aliya | 5478 | Retouched Flake  | 5 | 0.00 | 0.00 | 0.00 | 0.17 | 0.83 | 0.28 |
| Mugharet el Aliya | "    | Retouched Flake  | 5 | 0.00 | 0.00 | 0.00 | 0.00 | 1.00 | 0.00 |
| Mugharet el Aliya | "    | Retouched Blade  | 3 | 0.00 | 0.00 | 0.91 | 0.06 | 0.02 | 0.17 |
| Mugharet el Aliya | "    | Retouched Flake  | 5 | 0.00 | 0.00 | 0.00 | 0.00 | 1.00 | 0.00 |
| Mugharet el Aliya | 5594 | Retouched Point  | 1 | 0.00 | 0.00 | 0.07 | 0.93 | 0.00 | 0.13 |
| Mugharet el Aliya | "    | Retouched Point  | 1 | 0.00 | 0.00 | 0.02 | 0.97 | 0.01 | 0.06 |

|                   |                                      |                  |   |      |      |      |      |      |      |
|-------------------|--------------------------------------|------------------|---|------|------|------|------|------|------|
| Mugharet el Aliya | 5594                                 | Retouched Point  | 5 | 0.00 | 0.00 | 0.00 | 0.00 | 1.00 | 0.00 |
| Mugharet el Aliya | 5550                                 | Retouched Point  | 1 | 0.00 | 0.00 | 0.00 | 0.87 | 0.13 | 0.23 |
| Mugharet el Aliya | 5491                                 | Retouched Blade  | 3 | 0.00 | 0.00 | 0.60 | 0.40 | 0.00 | 0.48 |
| Mugharet el Aliya | 5507                                 | Bifacial Foliate | 2 | 1.00 | 0.00 | 0.00 | 0.00 | 0.00 | 0.00 |
| Mugharet el Aliya | 5530                                 | Bifacial Foliate | 2 | 0.72 | 0.00 | 0.00 | 0.27 | 0.00 | 0.41 |
| Mugharet el Aliya | 5465                                 | Retouched Blade  | 1 | 0.00 | 0.00 | 0.22 | 0.78 | 0.00 | 0.34 |
| Mugharet el Aliya | "                                    | Retouched Flake  | 5 | 0.00 | 0.00 | 0.00 | 0.00 | 1.00 | 0.00 |
| Mugharet el Aliya | 5472                                 | Retouched Flake  | 2 | 0.44 | 0.00 | 0.12 | 0.37 | 0.08 | 0.65 |
| Mugharet el Aliya | 5473                                 | Retouched Point  | 5 | 0.00 | 0.00 | 0.00 | 0.00 | 1.00 | 0.00 |
| Mugharet el Aliya | "                                    | Retouched Point  | 3 | 0.00 | 0.00 | 0.50 | 0.49 | 0.01 | 0.51 |
| Mugharet el Aliya | "                                    | Retouched Point  | 1 | 0.00 | 0.00 | 0.00 | 1.00 | 0.00 | 0.00 |
| Mugharet el Aliya | 39.69.50/4635                        | Retouched Flake  | 5 | 0.30 | 0.00 | 0.07 | 0.14 | 0.49 | 0.65 |
| Mugharet el Aliya | "                                    | Retouched Point  | 1 | 0.00 | 0.00 | 0.05 | 0.87 | 0.09 | 0.23 |
| Mugharet el Aliya | 4646                                 | Retouched Blade  | 3 | 0.00 | 0.00 | 0.60 | 0.28 | 0.12 | 0.55 |
| Mugharet el Aliya | 4669 Classic convergent side scraper | Retouched Point  | 5 | 0.00 | 0.00 | 0.47 | 0.03 | 0.50 | 0.53 |
| Mugharet el Aliya | "                                    | Retouched Point  | 1 | 0.00 | 0.00 | 0.05 | 0.94 | 0.01 | 0.11 |
| Mugharet el Aliya | " Classic convergent side scraper    | Retouched Flake  | 1 | 0.00 | 0.00 | 0.00 | 0.98 | 0.02 | 0.04 |
| Mugharet el Aliya | "                                    | Retouched Point  | 1 | 0.00 | 0.00 | 0.00 | 1.00 | 0.00 | 0.00 |
| Mugharet el Aliya | "                                    | Retouched Flake  | 5 | 0.00 | 0.00 | 0.00 | 0.00 | 1.00 | 0.00 |
| Mugharet el Aliya | 4631                                 | Retouched Point  | 1 | 0.00 | 0.00 | 0.08 | 0.92 | 0.00 | 0.15 |
| Mugharet el Aliya | 5531                                 | Flake            | 5 | 0.00 | 0.00 | 0.00 | 0.00 | 1.00 | 0.00 |
| Mugharet el Aliya | 4644                                 | Retouched Flake  | 3 | 0.00 | 0.00 | 0.78 | 0.14 | 0.08 | 0.37 |
| Mugharet el Aliya | 4628                                 | Retouched Flake  | 5 | 0.00 | 0.00 | 0.12 | 0.13 | 0.75 | 0.41 |
| Mugharet el Aliya | "                                    | Bifacial Foliate | 2 | 0.88 | 0.00 | 0.00 | 0.12 | 0.00 | 0.21 |
| Mugharet el Aliya | "                                    | Bifacial Foliate | 2 | 1.00 | 0.00 | 0.00 | 0.00 | 0.00 | 0.00 |
| Mugharet el Aliya | 39-69-50/4632                        | Bifacial Foliate | 2 | 0.92 | 0.00 | 0.00 | 0.08 | 0.00 | 0.15 |

|                   |                        |                             |   |      |      |      |      |      |      |
|-------------------|------------------------|-----------------------------|---|------|------|------|------|------|------|
| Mugharet el Aliya | "                      | Bifacial Foliate            | 2 | 0.95 | 0.00 | 0.00 | 0.05 | 0.00 | 0.10 |
| Mugharet el Aliya | "                      | Bifacial Foliate            | 2 | 0.97 | 0.00 | 0.00 | 0.03 | 0.00 | 0.06 |
| Mugharet el Aliya | 41-51-50/5487          | Bifacial Foliate            | 2 | 0.98 | 0.00 | 0.00 | 0.02 | 0.00 | 0.04 |
| Mugharet el Aliya | 5507                   | Bifacial Foliate            | 2 | 0.99 | 0.00 | 0.00 | 0.01 | 0.00 | 0.02 |
| Mugharet el Aliya | 39-69-50/4632          | Bifacial Foliate            | 1 | 0.06 | 0.00 | 0.02 | 0.85 | 0.06 | 0.27 |
| Mugharet el Aliya | "                      | Bifacial Foliate            | 2 | 1.00 | 0.00 | 0.00 | 0.00 | 0.00 | 0.00 |
| Mugharet el Aliya | 39-69-50/4624          | Retouched Unifacial foliate | 3 | 0.04 | 0.00 | 0.58 | 0.38 | 0.00 | 0.52 |
| Mugharet el Aliya | 4637 Asymmetric Point  | Retouched Point             | 1 | 0.00 | 0.00 | 0.06 | 0.84 | 0.10 | 0.28 |
| Mugharet el Aliya | "                      | Retouched Flake             | 3 | 0.00 | 0.00 | 0.62 | 0.00 | 0.37 | 0.48 |
| Mugharet el Aliya | "                      | Retouched Point             | 5 | 0.00 | 0.00 | 0.01 | 0.00 | 0.99 | 0.02 |
| Mugharet el Aliya | 5507                   | Bifacial Foliate            | 2 | 0.99 | 0.00 | 0.01 | 0.01 | 0.00 | 0.02 |
| Mugharet el Aliya | 41-51-50/5474          | Bifacial Foliate            | 2 | 0.99 | 0.00 | 0.00 | 0.01 | 0.00 | 0.02 |
| Mugharet el Aliya | 5474                   | Bifacial Foliate            | 2 | 0.99 | 0.00 | 0.00 | 0.01 | 0.00 | 0.02 |
| Mugharet el Aliya | 4635                   | Bifacial Foliate            | 2 | 0.99 | 0.00 | 0.00 | 0.01 | 0.00 | 0.02 |
| Mugharet el Aliya | 41-51-50/5463          | Bifacial Foliate            | 2 | 1.00 | 0.00 | 0.00 | 0.00 | 0.00 | 0.00 |
| Mugharet el Aliya | 39-69-50/4643          | Retouched Unifacial foliate | 1 | 0.00 | 0.00 | 0.00 | 0.97 | 0.03 | 0.06 |
| Mugharet el Aliya | 4629 Unifacial foliate | Retouched Point             | 1 | 0.00 | 0.00 | 0.07 | 0.93 | 0.00 | 0.13 |
| Mugharet el Aliya | 41-51-50/5478          | Retouched Unifacial foliate | 2 | 0.99 | 0.00 | 0.00 | 0.00 | 0.01 | 0.02 |
| Mugharet el Aliya | 39-69-50/4636          | Retouched Unifacial foliate | 5 | 0.00 | 0.00 | 0.00 | 0.29 | 0.71 | 0.41 |
| Mugharet el Aliya | 41-51-50/5462          | Retouched Point             | 1 | 0.00 | 0.00 | 0.11 | 0.87 | 0.02 | 0.23 |
| Mugharet el Aliya | "                      | Retouched Point             | 5 | 0.00 | 0.00 | 0.00 | 0.05 | 0.95 | 0.10 |
| Mugharet el Aliya | ?                      | Retouched Point             | 1 | 0.00 | 0.00 | 0.01 | 0.98 | 0.01 | 0.04 |
| Mugharet el Aliya | 39-69-50/4633          | Retouched Point             | 1 | 0.00 | 0.00 | 0.00 | 1.00 | 0.00 | 0.00 |
| Mugharet el Aliya | 4632                   | Bifacial Foliate            | 2 | 0.99 | 0.00 | 0.01 | 0.00 | 0.00 | 0.02 |
| Mugharet el Aliya | 4629                   | Bifacial Foliate            | 2 | 0.99 | 0.00 | 0.00 | 0.01 | 0.00 | 0.02 |
| Mugharet el Aliya | "                      | Bifacial Foliate            | 2 | 1.00 | 0.00 | 0.00 | 0.00 | 0.00 | 0.00 |
| Mugharet el Aliya | 41-51-50/5474          | Bifacial Foliate            | 2 | 0.99 | 0.00 | 0.00 | 0.01 | 0.00 | 0.02 |

|                   |                                                                 |                  |   |      |      |      |      |      |      |
|-------------------|-----------------------------------------------------------------|------------------|---|------|------|------|------|------|------|
| Mugharet el Aliya | 5463                                                            | Bifacial Foliate | 2 | 0.92 | 0.00 | 0.00 | 0.08 | 0.00 | 0.15 |
| Mugharet el Aliya | 5463                                                            | Bifacial Foliate | 2 | 0.99 | 0.00 | 0.00 | 0.01 | 0.00 | 0.02 |
| Mugharet el Aliya | 4636                                                            | Retouched Flake  | 2 | 0.99 | 0.00 | 0.00 | 0.01 | 0.00 | 0.02 |
| Mugharet el Aliya | 4629                                                            | Bifacial Foliate | 2 | 0.97 | 0.00 | 0.01 | 0.02 | 0.00 | 0.06 |
| Mugharet el Aliya | 41-51-50/5474                                                   | Bifacial Foliate | 2 | 0.77 | 0.00 | 0.00 | 0.23 | 0.00 | 0.35 |
| Mugharet el Aliya | 5507                                                            | Bifacial Foliate | 2 | 0.96 | 0.00 | 0.02 | 0.00 | 0.01 | 0.08 |
| Mugharet el Aliya | 5473                                                            | Retouched Point  | 5 | 0.00 | 0.00 | 0.00 | 0.00 | 1.00 | 0.00 |
| Mugharet el Aliya | "                                                               | Retouched Flake  | 5 | 0.00 | 0.00 | 0.22 | 0.26 | 0.52 | 0.61 |
| Mugharet el Aliya | "                                                               | Retouched Flake  | 1 | 0.00 | 0.00 | 0.11 | 0.87 | 0.02 | 0.23 |
| Mugharet el Aliya | 39-69-50/4635                                                   | Retouched Flake  | 1 | 0.00 | 0.00 | 0.11 | 0.87 | 0.02 | 0.23 |
| Mugharet el Aliya | "                                                               | Retouched Flake  | 1 | 0.00 | 0.00 | 0.00 | 0.78 | 0.22 | 0.34 |
| Mugharet el Aliya | "                                                               | Retouched Flake  | 1 | 0.00 | 0.00 | 0.08 | 0.78 | 0.15 | 0.36 |
| Mugharet el Aliya | "                                                               | Retouched Point  | 1 | 0.00 | 0.00 | 0.01 | 0.99 | 0.00 | 0.02 |
| Mugharet el Aliya | 4633 Lozenge shaped point with invasive bifacial basal thinning | Retouched Point  | 2 | 0.91 | 0.00 | 0.00 | 0.06 | 0.03 | 0.17 |
| Mugharet el Aliya | 4634 Point with bulbar truncation                               | Retouched Point  | 5 | 0.00 | 0.00 | 0.00 | 0.33 | 0.66 | 0.46 |
| Mugharet el Aliya | " Proximally retouched point                                    | Retouched Point  | 5 | 0.00 | 0.00 | 0.00 | 0.00 | 1.00 | 0.00 |
| Mugharet el Aliya | 41-51-50/5471                                                   | Retouched Point  | 1 | 0.23 | 0.00 | 0.00 | 0.77 | 0.00 | 0.35 |
| Mugharet el Aliya | 39-69-50/4634                                                   | Retouched Point  | 2 | 0.69 | 0.00 | 0.02 | 0.24 | 0.06 | 0.46 |
| Mugharet el Aliya | 41-51-50/5471                                                   | Retouched Flake  | 2 | 0.99 | 0.00 | 0.00 | 0.00 | 0.01 | 0.02 |
| Mugharet el Aliya | 5505                                                            | Retouched Point  | 5 | 0.01 | 0.00 | 0.00 | 0.29 | 0.70 | 0.43 |
| Mugharet el Aliya | "                                                               | Retouched Flake  | 2 | 0.95 | 0.00 | 0.01 | 0.03 | 0.01 | 0.10 |
| Mugharet el Aliya | 5471                                                            | Retouched Flake  | 2 | 0.86 | 0.00 | 0.00 | 0.13 | 0.01 | 0.24 |
| Mugharet el Aliya | 5519                                                            | Retouched Flake  | 2 | 0.83 | 0.00 | 0.02 | 0.14 | 0.01 | 0.29 |
| Mugharet el Aliya | 5504                                                            | Retouched Flake  | 1 | 0.00 | 0.00 | 0.06 | 0.91 | 0.03 | 0.17 |
| Mugharet el Aliya | 5509                                                            | Retouched Blade  | 3 | 0.00 | 0.00 | 1.00 | 0.00 | 0.00 | 0.00 |
| Mugharet el Aliya | 30-69-50/4619                                                   | Retouched Flake  | 1 | 0.00 | 0.00 | 0.00 | 0.80 | 0.20 | 0.32 |

|                   |                |                  |   |      |      |      |      |      |      |
|-------------------|----------------|------------------|---|------|------|------|------|------|------|
| Mugharet el Aliya | 41-51-50/5506  | Retouched Flake  | 5 | 0.00 | 0.00 | 0.00 | 0.00 | 1.00 | 0.00 |
| Mugharet el Aliya | 41-51-50/5456  | Retouched Point  | 2 | 0.44 | 0.00 | 0.38 | 0.17 | 0.00 | 0.63 |
| Mugharet el Aliya | 5509           | Retouched Flake  | 5 | 0.00 | 0.00 | 0.00 | 0.00 | 1.00 | 0.00 |
| Mugharet el Aliya | "              | Retouched Flake  | 5 | 0.00 | 0.00 | 0.19 | 0.04 | 0.77 | 0.37 |
| Mugharet el Aliya | 39-69-50/4626  | Bifacial Foliate | 2 | 0.92 | 0.00 | 0.00 | 0.08 | 0.00 | 0.15 |
| Mugharet el Aliya | 48-5-50/8924   | Retouched Flake  | 5 | 0.00 | 0.00 | 0.00 | 0.00 | 1.00 | 0.00 |
| Mugharet el Aliya | 4619           | Retouched Flake  | 5 | 0.00 | 0.00 | 0.00 | 0.00 | 1.00 | 0.00 |
| Mugharet el Aliya | 41-51-50/5531  | Retouched Flake  | 5 | 0.00 | 0.00 | 0.06 | 0.00 | 0.94 | 0.11 |
| Mugharet el Aliya | 5596           | Retouched Flake  | 5 | 0.00 | 0.00 | 0.01 | 0.00 | 0.99 | 0.02 |
| Mugharet el Aliya | 41-51-50/5540  | Retouched Point  | 1 | 0.00 | 0.00 | 0.14 | 0.74 | 0.12 | 0.42 |
| Mugharet el Aliya | 5594           | Retouched Point  | 3 | 0.00 | 0.00 | 0.57 | 0.11 | 0.32 | 0.56 |
| Mugharet el Aliya | 39-69-50/4632  | Bifacial Foliate | 2 | 0.99 | 0.00 | 0.00 | 0.01 | 0.00 | 0.02 |
| Adrar Bous        | ADB/121/5/345  | Retouched Point  | 2 | 0.97 | 0.00 | 0.00 | 0.03 | 0.00 | 0.06 |
| Adrar Bous        | ADB/121/5/351  | Bifacial Foliate | 2 | 0.95 | 0.00 | 0.00 | 0.04 | 0.00 | 0.10 |
| Adrar Bous        | ADB/121/5/350  | Retouched Point  | 2 | 0.84 | 0.00 | 0.00 | 0.16 | 0.00 | 0.27 |
| Adrar Bous        | ADB/121/3/333  | Bifacial Foliate | 2 | 1.00 | 0.00 | 0.00 | 0.00 | 0.00 | 0.00 |
| Adrar Bous        | ADB/121/3/338  | Bifacial Foliate | 2 | 1.00 | 0.00 | 0.00 | 0.00 | 0.00 | 0.00 |
| Adrar Bous        | ADB/121/3/339  | Bifacial Foliate | 2 | 1.00 | 0.00 | 0.00 | 0.00 | 0.00 | 0.00 |
| Adrar Bous        | ADB/121/7/348  | Retouched Point  | 1 | 0.19 | 0.00 | 0.04 | 0.77 | 0.00 | 0.37 |
| Adrar Bous        | ADB/121/18/200 | Blade            | 1 | 0.00 | 0.39 | 0.00 | 0.61 | 0.00 | 0.48 |
| Adrar Bous        | ADB/121/6/343  | Retouched Flake  | 3 | 0.00 | 0.00 | 0.97 | 0.01 | 0.03 | 0.06 |
| Adrar Bous        | ADB/121/6/349  | Retouched Flake  | 5 | 0.00 | 0.00 | 0.01 | 0.01 | 0.98 | 0.04 |
| Adrar Bous        | ADB/121/6/344  | Retouched Point  | 2 | 0.96 | 0.00 | 0.00 | 0.04 | 0.00 | 0.08 |
| Adrar Bous        | ADB/121/32/55  | Retouched Flake  | 3 | 0.00 | 0.00 | 0.52 | 0.37 | 0.12 | 0.58 |
| Adrar Bous        | ADB/121/32/60  | Retouched Flake  | 5 | 0.00 | 0.00 | 0.06 | 0.01 | 0.93 | 0.13 |
| Adrar Bous        | ADB/121/32/274 | Retouched Flake  | 5 | 0.00 | 0.00 | 0.00 | 0.00 | 1.00 | 0.00 |
| Adrar Bous        | ADB/121/32/97  | Retouched Flake  | 5 | 0.00 | 0.00 | 0.20 | 0.01 | 0.79 | 0.34 |

|               |                                               |                     |   |      |      |      |      |      |      |
|---------------|-----------------------------------------------|---------------------|---|------|------|------|------|------|------|
| Adrar<br>Bous | ADB/121/32/271                                | Retouched<br>Flake  | 5 | 0.00 | 0.00 | 0.00 | 0.00 | 1.00 | 0.00 |
| Adrar<br>Bous | ADB/121/32/174                                | Retouched<br>Flake  | 5 | 0.00 | 0.00 | 0.05 | 0.00 | 0.95 | 0.10 |
| Adrar<br>Bous | ADB/121/32/288                                | Retouched<br>Flake  | 5 | 0.00 | 0.00 | 0.03 | 0.00 | 0.97 | 0.06 |
| Adrar<br>Bous | ADB/121/32/285<br>Notch on debordant<br>blade | Debordant<br>Flake  | 3 | 0.00 | 0.00 | 1.00 | 0.00 | 0.00 | 0.00 |
| Adrar<br>Bous | ADB/121/31/62                                 | Retouched<br>Flake  | 1 | 0.00 | 0.00 | 0.00 | 0.99 | 0.01 | 0.02 |
| Adrar<br>Bous | ADB/121/33/242                                | Retouched<br>Flake  | 1 | 0.00 | 0.00 | 0.00 | 0.69 | 0.31 | 0.43 |
| Adrar<br>Bous | ADB/121/33/197                                | Retouched<br>Flake  | 3 | 0.00 | 0.00 | 0.54 | 0.00 | 0.46 | 0.50 |
| Adrar<br>Bous | ADB/121/33/245                                | Retouched<br>Blade  | 3 | 0.00 | 0.00 | 1.00 | 0.00 | 0.00 | 0.00 |
| Adrar<br>Bous | ADB/121/35/286                                | Retouched<br>Flake  | 3 | 0.00 | 0.00 | 0.72 | 0.01 | 0.27 | 0.41 |
| Adrar<br>Bous | ADB/121/35/202                                | Retouched<br>Blade  | 1 | 0.00 | 0.00 | 0.47 | 0.53 | 0.00 | 0.50 |
| Adrar<br>Bous | ADB/121/35/326                                | Retouched<br>Point  | 3 | 0.00 | 0.00 | 0.75 | 0.24 | 0.02 | 0.38 |
| Adrar<br>Bous | ADB/121/35/328                                | Retouched<br>Flake  | 2 | 1.00 | 0.00 | 0.00 | 0.00 | 0.00 | 0.00 |
| Adrar<br>Bous | ADB/121/35/347                                | Retouched<br>Flake  | 2 | 1.00 | 0.00 | 0.00 | 0.00 | 0.00 | 0.00 |
| Adrar<br>Bous | ADB/121/35/162                                | Retouched<br>Flake  | 1 | 0.00 | 0.00 | 0.00 | 0.96 | 0.04 | 0.08 |
| Adrar<br>Bous | ADB/121/35/254                                | Retouched<br>Flake  | 3 | 0.00 | 0.00 | 0.90 | 0.07 | 0.03 | 0.18 |
| Adrar<br>Bous | ADB/121/35/181                                | Retouched<br>Flake  | 5 | 0.00 | 0.00 | 0.00 | 0.00 | 1.00 | 0.00 |
| Adrar<br>Bous | ADB/121/35/207                                | Retouched<br>Blade  | 3 | 0.00 | 0.00 | 0.99 | 0.01 | 0.00 | 0.02 |
| Adrar<br>Bous | ADB/121/35/287                                | Retouched<br>Flake  | 3 | 0.06 | 0.00 | 0.85 | 0.07 | 0.03 | 0.27 |
| Adrar<br>Bous | ADB/121/35/308                                | Retouched<br>Point  | 3 | 0.00 | 0.00 | 0.57 | 0.38 | 0.04 | 0.53 |
| Adrar<br>Bous | ADB/121/35/306<br>Convergent scraper          | Retouched<br>Point  | 3 | 0.00 | 0.00 | 0.90 | 0.09 | 0.01 | 0.18 |
| Adrar<br>Bous | ADB/121/36/85                                 | Retouched<br>Flake  | 5 | 0.00 | 0.00 | 0.00 | 0.00 | 1.00 | 0.00 |
| Adrar<br>Bous | ADB/121/36/119                                | Retouched<br>Flake  | 1 | 0.00 | 0.00 | 0.14 | 0.48 | 0.38 | 0.61 |
| Adrar<br>Bous | ADB/121/36/138                                | Retouched<br>Flake  | 5 | 0.00 | 0.00 | 0.00 | 0.00 | 1.00 | 0.00 |
| Adrar<br>Bous | ADB/121/28/252                                | Bifacial<br>Foliate | 2 | 1.00 | 0.00 | 0.00 | 0.00 | 0.00 | 0.00 |
| Adrar<br>Bous | ADB/121/28/249                                | Bifacial<br>Foliate | 2 | 1.00 | 0.00 | 0.00 | 0.00 | 0.00 | 0.00 |
| Adrar<br>Bous | ADB/121/28/149 Core<br>axe                    | Core tool           | 2 | 0.85 | 0.00 | 0.14 | 0.00 | 0.00 | 0.26 |

|               |                                                                                                |                              |   |      |      |      |      |      |      |
|---------------|------------------------------------------------------------------------------------------------|------------------------------|---|------|------|------|------|------|------|
| Adrar<br>Bous | ADB/121/26/290                                                                                 | Retouched<br>Flake           | 3 | 0.00 | 0.00 | 0.90 | 0.03 | 0.07 | 0.18 |
| Adrar<br>Bous | ADB/121/26/278                                                                                 | Retouched<br>Flake           | 3 | 0.00 | 0.00 | 0.78 | 0.12 | 0.10 | 0.37 |
| Adrar<br>Bous | ADB/121/26/63                                                                                  | Retouched<br>Flake           | 5 | 0.00 | 0.00 | 0.00 | 0.06 | 0.94 | 0.11 |
| Adrar<br>Bous | ADB/121/26/315                                                                                 | Retouched<br>Flake           | 3 | 0.00 | 0.00 | 0.68 | 0.14 | 0.18 | 0.49 |
| Adrar<br>Bous | ADB/121/26/317                                                                                 | Retouched<br>Flake           | 3 | 0.00 | 0.00 | 0.56 | 0.03 | 0.41 | 0.52 |
| Adrar<br>Bous | ADB/121/26/320                                                                                 | Retouched<br>Flake           | 5 | 0.00 | 0.00 | 0.35 | 0.16 | 0.49 | 0.61 |
| Adrar<br>Bous | ADB/121/26/314                                                                                 | Dihedral<br>Tool             | 4 | 0.00 | 0.94 | 0.00 | 0.00 | 0.06 | 0.11 |
| Adrar<br>Bous | ADB/121/26/321                                                                                 | Pseudo<br>Levallois<br>Point | 3 | 0.00 | 0.00 | 0.73 | 0.23 | 0.04 | 0.41 |
| Adrar<br>Bous | ADB/121/26/199                                                                                 | Retouched<br>Flake           | 3 | 0.00 | 0.00 | 0.85 | 0.11 | 0.04 | 0.26 |
| Adrar<br>Bous | ADB/121/26/313                                                                                 | Retouched<br>Flake           | 1 | 0.00 | 0.00 | 0.43 | 0.46 | 0.11 | 0.59 |
| Adrar<br>Bous | ADB/121/26/312                                                                                 | Retouched<br>Flake           | 5 | 0.00 | 0.00 | 0.00 | 0.14 | 0.86 | 0.24 |
| Adrar<br>Bous | ADB/121/26/273                                                                                 | Retouched<br>Flake           | 5 | 0.00 | 0.00 | 0.00 | 0.00 | 1.00 | 0.00 |
| Adrar<br>Bous | ADB/121/26/214                                                                                 | Retouched<br>Flake           | 5 | 0.00 | 0.00 | 0.00 | 0.00 | 1.00 | 0.00 |
| Adrar<br>Bous | ADB/121/26/237                                                                                 | Retouched<br>Flake           | 3 | 0.00 | 0.00 | 0.97 | 0.03 | 0.00 | 0.06 |
| Adrar<br>Bous | ADB/121/26/188                                                                                 | Retouched<br>Flake           | 5 | 0.00 | 0.00 | 0.03 | 0.32 | 0.65 | 0.47 |
| Adrar<br>Bous | ADB/121/26/191                                                                                 | Retouched<br>Flake           | 5 | 0.00 | 0.00 | 0.00 | 0.07 | 0.93 | 0.13 |
| Adrar<br>Bous | ADB/121/23/180                                                                                 | Retouched<br>Flake           | 1 | 0.00 | 0.00 | 0.00 | 0.89 | 0.11 | 0.20 |
| Adrar<br>Bous | ADB/121/23/184                                                                                 | Retouched<br>Point           | 1 | 0.00 | 0.00 | 0.06 | 0.94 | 0.00 | 0.11 |
| Adrar<br>Bous | ADB/121/20/332<br>called 'strangulated<br>scraper' - opposing<br>complex notches on<br>lateral | Retouched<br>Flake           | 3 | 0.00 | 0.00 | 0.72 | 0.02 | 0.26 | 0.41 |
| Adrar<br>Bous | ADB/121/20/331<br>called 'strangulated<br>scraper' - opposing<br>complex notches on<br>lateral | Retouched<br>Flake           | 5 | 0.00 | 0.00 | 0.00 | 0.00 | 1.00 | 0.00 |
| Adrar<br>Bous | ADB/121/11/136                                                                                 | Janus Flake                  | 5 | 0.00 | 0.00 | 0.03 | 0.00 | 0.97 | 0.06 |
| Adrar<br>Bous | ADB/121/10/266<br>Piercer?                                                                     | Retouched<br>Flake           | 1 | 0.00 | 0.00 | 0.16 | 0.83 | 0.01 | 0.29 |
| Adrar<br>Bous | ADB/122/1                                                                                      | Bifacial<br>Foliate          | 2 | 1.00 | 0.00 | 0.00 | 0.00 | 0.00 | 0.00 |

|               |                                            |                     |   |      |      |      |      |      |      |
|---------------|--------------------------------------------|---------------------|---|------|------|------|------|------|------|
| Adrar<br>Bous | ADB/122/unmarked<br>bag                    | Retouched<br>Flake  | 3 | 0.00 | 0.00 | 0.92 | 0.08 | 0.00 | 0.15 |
| Adrar<br>Bous | ADB/122/unmarked<br>bag                    | Retouched<br>Blade  | 3 | 0.00 | 0.00 | 0.98 | 0.02 | 0.00 | 0.04 |
| Adrar<br>Bous | ADB/122/unmarked<br>bag                    | Bifacial<br>Foliate | 2 | 1.00 | 0.00 | 0.00 | 0.00 | 0.00 | 0.00 |
| Adrar<br>Bous | ADB/122/unmarked<br>bag                    | Retouched<br>Flake  | 2 | 0.92 | 0.00 | 0.00 | 0.08 | 0.00 | 0.15 |
| Adrar<br>Bous | ADB/122/unmarked<br>bag                    | Retouched<br>Blade  | 2 | 0.97 | 0.00 | 0.03 | 0.01 | 0.00 | 0.06 |
| Adrar<br>Bous | ADB/122/unmarked<br>bag                    | Retouched<br>Point  | 1 | 0.00 | 0.00 | 0.00 | 1.00 | 0.00 | 0.00 |
| Adrar<br>Bous | ADB/122/unmarked<br>bag                    | Bifacial<br>Foliate | 2 | 0.99 | 0.00 | 0.00 | 0.01 | 0.00 | 0.02 |
| Adrar<br>Bous | ADB/122/unmarked<br>bag Piercer            | Retouched<br>Flake  | 1 | 0.38 | 0.00 | 0.14 | 0.48 | 0.00 | 0.61 |
| Adrar<br>Bous | ADB/122/unmarked<br>bag                    | Bifacial<br>Foliate | 2 | 0.99 | 0.00 | 0.00 | 0.01 | 0.00 | 0.02 |
| Adrar<br>Bous | ADB/122/7/17                               | Retouched<br>Flake  | 3 | 0.00 | 0.00 | 0.68 | 0.22 | 0.10 | 0.48 |
| Adrar<br>Bous | ADB/122/5/?                                | Retouched<br>Blade  | 3 | 0.00 | 0.00 | 0.99 | 0.01 | 0.00 | 0.02 |
| Adrar<br>Bous | ADB/122/5/? Side<br>Scraper                | Retouched<br>Flake  | 3 | 0.00 | 0.00 | 0.96 | 0.03 | 0.01 | 0.08 |
| Adrar<br>Bous | ADB/122/5/? Core on<br>flake?! End scraper | Retouched<br>Flake  | 5 | 0.00 | 0.00 | 0.43 | 0.00 | 0.57 | 0.49 |
| Adrar<br>Bous | ADB/122/5/?                                | Retouched<br>Flake  | 3 | 0.00 | 0.00 | 1.00 | 0.00 | 0.00 | 0.00 |
| Adrar<br>Bous | ADB/122/5/?                                | Retouched<br>Flake  | 3 | 0.00 | 0.00 | 0.40 | 0.20 | 0.40 | 0.64 |
| Adrar<br>Bous | ADB/122/5/?                                | Bifacial<br>Foliate | 2 | 0.99 | 0.00 | 0.00 | 0.01 | 0.00 | 0.02 |
| Adrar<br>Bous | ADB/122/5/?                                | Retouched<br>Flake  | 1 | 0.00 | 0.00 | 0.24 | 0.66 | 0.10 | 0.50 |
| Adrar<br>Bous | ADB/122/5/?                                | Retouched<br>Point  | 5 | 0.00 | 0.00 | 0.00 | 0.00 | 1.00 | 0.00 |
| Adrar<br>Bous | ADB/122/5/small bag                        | Bifacial<br>Foliate | 2 | 0.99 | 0.00 | 0.00 | 0.01 | 0.00 | 0.02 |
| Adrar<br>Bous | ADB/122/5/small bag<br>Double side-scraper | Retouched<br>Flake  | 5 | 0.00 | 0.00 | 0.25 | 0.02 | 0.74 | 0.39 |
| Adrar<br>Bous | ADB/122/5/small bag                        | Bifacial<br>Foliate | 2 | 0.76 | 0.00 | 0.01 | 0.23 | 0.00 | 0.37 |
| Adrar<br>Bous | ADB/122/5/small bag                        | Bifacial<br>Foliate | 2 | 0.94 | 0.00 | 0.00 | 0.05 | 0.00 | 0.11 |
| Adrar<br>Bous | ADB/122/5/small bag                        | Bifacial<br>Foliate | 2 | 1.00 | 0.00 | 0.00 | 0.00 | 0.00 | 0.00 |
| Adrar<br>Bous | ADB/122/5/small bag                        | Bifacial<br>Foliate | 2 | 1.00 | 0.00 | 0.00 | 0.00 | 0.00 | 0.00 |
| Adrar<br>Bous | ADB/122/5/small bag<br>Ovate               | Biface              | 2 | 0.50 | 0.00 | 0.49 | 0.00 | 0.00 | 0.51 |
| Adrar<br>Bous | ADB/122/5/small bag                        | Bifacial<br>Foliate | 2 | 0.71 | 0.00 | 0.09 | 0.20 | 0.00 | 0.45 |
| Adrar<br>Bous | ADB/122/5/small bag                        | Bifacial<br>Foliate | 2 | 0.90 | 0.00 | 0.10 | 0.00 | 0.00 | 0.18 |

|            |                     |                   |   |      |      |      |      |      |      |
|------------|---------------------|-------------------|---|------|------|------|------|------|------|
| Adrar Bous | ADB/122/5/small bag | Bifacial Foliate  | 2 | 0.44 | 0.00 | 0.38 | 0.17 | 0.00 | 0.63 |
| Adrar Bous | ADB/128/14/39T      | Bifacial Foliate  | 2 | 0.96 | 0.00 | 0.00 | 0.04 | 0.00 | 0.08 |
| Adrar Bous | ADB/128/14/unmarked | Bifacial Foliate  | 2 | 0.91 | 0.00 | 0.00 | 0.09 | 0.00 | 0.16 |
| Adrar Bous | ADB/128/14/unmarked | Bifacial Foliate  | 2 | 0.58 | 0.00 | 0.13 | 0.29 | 0.00 | 0.56 |
| Adrar Bous | ADB/128/14/46T      | Bifacial Foliate  | 2 | 0.71 | 0.00 | 0.09 | 0.20 | 0.00 | 0.45 |
| Adrar Bous | ADB/128/14/44T      | Bifacial Foliate  | 2 | 0.94 | 0.00 | 0.00 | 0.05 | 0.00 | 0.11 |
| Adrar Bous | ADB/128/14/43T      | Bifacial Foliate  | 1 | 0.43 | 0.00 | 0.10 | 0.47 | 0.00 | 0.58 |
| Adrar Bous | ADB/128/14/48T      | Bifacial Foliate  | 2 | 0.73 | 0.00 | 0.27 | 0.00 | 0.00 | 0.39 |
| Adrar Bous | ADB/128/14/49T      | Bifacial Foliate  | 2 | 0.95 | 0.00 | 0.01 | 0.04 | 0.00 | 0.10 |
| Adrar Bous | ADB/128/14/47T      | Bifacial Foliate  | 2 | 0.95 | 0.00 | 0.00 | 0.04 | 0.00 | 0.10 |
| Adrar Bous | ADB/128/16/50T      | Retouched Flake   | 2 | 0.65 | 0.00 | 0.04 | 0.30 | 0.01 | 0.49 |
| Adrar Bous | ADB/128/16/35T      | Retouched Flake   | 3 | 0.00 | 0.00 | 0.57 | 0.43 | 0.00 | 0.49 |
| Adrar Bous | ADB/128/16/32T      | Retouched Point   | 2 | 0.82 | 0.00 | 0.00 | 0.18 | 0.00 | 0.30 |
| Adrar Bous | ADB/128/16/37T      | Retouched Flake   | 2 | 0.82 | 0.00 | 0.00 | 0.18 | 0.00 | 0.30 |
| Adrar Bous | ADB/128/16/38T      | Retouched Point   | 2 | 0.94 | 0.00 | 0.06 | 0.00 | 0.00 | 0.11 |
| Adrar Bous | ADB/128/16/36T      | Retouched Point   | 2 | 0.52 | 0.00 | 0.11 | 0.37 | 0.00 | 0.58 |
| Adrar Bous | ADB/128/16/unmarked | Retouched Point   | 2 | 0.97 | 0.00 | 0.00 | 0.03 | 0.00 | 0.06 |
| Adrar Bous | ADB/128/16/40T      | Retouched Point   | 2 | 0.58 | 0.00 | 0.13 | 0.29 | 0.00 | 0.56 |
| Adrar Bous | ADB/128/16/unmarked | Retouched Point   | 2 | 0.72 | 0.00 | 0.00 | 0.27 | 0.00 | 0.41 |
| Adrar Bous | ADB/128/13/8T       | Retouched Blade   | 1 | 0.00 | 0.00 | 0.07 | 0.93 | 0.00 | 0.13 |
| Adrar Bous | ADB/128/10/12T      | Retouched Flake   | 1 | 0.00 | 0.00 | 0.05 | 0.95 | 0.00 | 0.10 |
| Adrar Bous | ADB/128/10/52T      | Retouched Flake   | 2 | 0.97 | 0.00 | 0.00 | 0.03 | 0.00 | 0.06 |
| Adrar Bous | ADB/128/9/23T       | Retouched Scraper | 1 | 0.00 | 0.00 | 0.23 | 0.76 | 0.01 | 0.37 |
| Adrar Bous | ADB/128/8/26T       | Retouched Blade   | 1 | 0.00 | 0.00 | 0.43 | 0.57 | 0.00 | 0.49 |
| Adrar Bous | ADB/128/8/16T       | Retouched Flake   | 2 | 0.95 | 0.00 | 0.00 | 0.05 | 0.00 | 0.10 |
| Adrar Bous | ADB/128/7/29T       | Retouched Flake   | 2 | 0.94 | 0.00 | 0.00 | 0.05 | 0.00 | 0.11 |
| Adrar Bous | ADB/128/7/30T       | Retouched Flake   | 5 | 0.00 | 0.00 | 0.00 | 0.44 | 0.56 | 0.49 |

|            |                                 |                     |   |      |      |      |      |      |      |
|------------|---------------------------------|---------------------|---|------|------|------|------|------|------|
| Adrar Bous | ADB/128/6/27T<br>Tanged scraper | Retouched<br>Flake  | 5 | 0.00 | 0.00 | 0.00 | 0.39 | 0.61 | 0.48 |
| Adrar Bous | ADB/128/2/unmarked              | Retouched<br>Flake  | 3 | 0.00 | 0.00 | 0.52 | 0.48 | 0.00 | 0.50 |
| Adrar Bous | ADB/128/11/17T                  | Retouched<br>Point  | 1 | 0.00 | 0.00 | 0.00 | 0.96 | 0.04 | 0.08 |
| Adrar Bous | ADB/130/25/unmarked             | Bifacial<br>Foliate | 3 | 0.00 | 0.00 | 0.93 | 0.07 | 0.00 | 0.13 |
| Adrar Bous | ADB/130/25/unmarked             | Bifacial<br>Foliate | 2 | 0.97 | 0.00 | 0.00 | 0.02 | 0.00 | 0.06 |
| Adrar Bous | ADB/130/24/unmarked<br>Scraper  | Retouched<br>Flake  | 5 | 0.00 | 0.00 | 0.00 | 0.00 | 1.00 | 0.00 |
| Adrar Bous | ADB/130/39/unmarked             | Retouched<br>Flake  | 1 | 0.00 | 0.00 | 0.00 | 1.00 | 0.00 | 0.00 |
| Adrar Bous | ADB/130/38/unmarked             | Retouched<br>Point  | 1 | 0.00 | 0.00 | 0.08 | 0.78 | 0.15 | 0.36 |
| Adrar Bous | ADB/130/5/unmarked              | Retouched<br>Blade  | 1 | 0.00 | 0.00 | 0.39 | 0.60 | 0.02 | 0.49 |
| Adrar Bous | ADB/130/43/unmarked             | Retouched<br>Flake  | 5 | 0.00 | 0.00 | 0.03 | 0.00 | 0.97 | 0.06 |
| Adrar Bous | ADB/130/43/unmarked             | Retouched<br>Blade  | 3 | 0.00 | 0.00 | 1.00 | 0.00 | 0.00 | 0.00 |
| Adrar Bous | ADB/130/43/unmarked             | Bifacial<br>Foliate | 5 | 0.13 | 0.00 | 0.30 | 0.01 | 0.56 | 0.58 |
| Adrar Bous | ADB/130/2/unmarked              | Bifacial<br>Foliate | 2 | 1.00 | 0.00 | 0.00 | 0.00 | 0.00 | 0.00 |
| Adrar Bous | ADB/130/7/unmarked<br>Core axe  | Core tool           | 5 | 0.02 | 0.00 | 0.24 | 0.00 | 0.74 | 0.39 |
| Adrar Bous | ADB/130/17/unmarked<br>Core axe | Core tool           | 5 | 0.12 | 0.00 | 0.24 | 0.00 | 0.64 | 0.52 |
| Adrar Bous | ADB/130/22 Core axe             | Core tool           | 3 | 0.25 | 0.00 | 0.49 | 0.07 | 0.20 | 0.65 |
| Adrar Bous | ADB/131/26/unmarked             | Flake               | 5 | 0.00 | 0.00 | 0.25 | 0.02 | 0.73 | 0.40 |
| Adrar Bous | ADB/131/20/unmarked             | Retouched<br>Point  | 1 | 0.00 | 0.00 | 0.31 | 0.68 | 0.01 | 0.44 |
| Adrar Bous | ADB/131/20/unmarked             | Retouched<br>Point  | 3 | 0.00 | 0.00 | 0.96 | 0.03 | 0.01 | 0.08 |
| Adrar Bous | ADB/131/20/unmarked             | Retouched<br>Point  | 1 | 0.35 | 0.00 | 0.00 | 0.65 | 0.00 | 0.46 |
| Adrar Bous | ADB/131/4/unmarked              | Retouched<br>Flake  | 2 | 0.82 | 0.00 | 0.00 | 0.18 | 0.00 | 0.30 |
| Adrar Bous | ADB/131/11                      | Retouched<br>Flake  | 3 | 0.06 | 0.00 | 0.91 | 0.02 | 0.01 | 0.17 |
| Adrar Bous | ADB/131/3                       | Retouched<br>Flake  | 1 | 0.00 | 0.00 | 0.04 | 0.93 | 0.03 | 0.13 |
| Adrar Bous | ADB/131/29/unmarked             | Retouched<br>Blade  | 3 | 0.00 | 0.00 | 1.00 | 0.00 | 0.00 | 0.00 |
| Adrar Bous | ADB/131/29/unmarked             | Retouched<br>Blade  | 3 | 0.00 | 0.00 | 0.98 | 0.01 | 0.01 | 0.04 |
| Adrar Bous | ADB/131/29/unmarked             | Retouched<br>Flake  | 3 | 0.00 | 0.00 | 0.82 | 0.13 | 0.05 | 0.31 |
| Adrar Bous | ADB/131/29/unmarked             | Retouched<br>Flake  | 4 | 0.00 | 1.00 | 0.00 | 0.00 | 0.00 | 0.00 |

|            |                                         |                  |   |      |      |      |      |      |      |
|------------|-----------------------------------------|------------------|---|------|------|------|------|------|------|
| Adrar Bous | ADB/136/6/unmarked                      | Retouched Flake  | 3 | 0.00 | 0.00 | 0.52 | 0.48 | 0.00 | 0.50 |
| Adrar Bous | ADB/136/6/unmarked                      | Retouched Point  | 2 | 0.82 | 0.00 | 0.00 | 0.18 | 0.00 | 0.30 |
| Adrar Bous | ADB/9T                                  | Retouched Point  | 1 | 0.00 | 0.00 | 0.00 | 1.00 | 0.00 | 0.00 |
| Adrar Bous | ADB/41T                                 | Bifacial Foliate | 2 | 0.82 | 0.00 | 0.00 | 0.18 | 0.00 | 0.30 |
| Adrar Bous | ADB/21T                                 | Retouched Point  | 1 | 0.00 | 0.00 | 0.01 | 0.99 | 0.00 | 0.02 |
| Adrar Bous | ADB/136/6/unmarked                      | Bifacial Foliate | 2 | 0.68 | 0.00 | 0.00 | 0.31 | 0.00 | 0.44 |
| Adrar Bous | ADB/136/6/unmarked                      | Retouched Point  | 1 | 0.00 | 0.00 | 0.06 | 0.94 | 0.00 | 0.11 |
| Adrar Bous | ADB/136/6/unmarked                      | Bifacial Foliate | 2 | 0.96 | 0.00 | 0.04 | 0.00 | 0.00 | 0.08 |
| Adrar Bous | ADB/136/6/unmarked<br>Thick end scraper | Retouched Flake  | 3 | 0.20 | 0.00 | 0.54 | 0.00 | 0.26 | 0.60 |
| Adrar Bous | ADB/136/6/unmarked<br>Thick end scraper | Retouched Flake  | 5 | 0.11 | 0.00 | 0.25 | 0.00 | 0.64 | 0.52 |
| Adrar Bous | ADB/136/6/unmarked<br>Core axe          | Core tool        | 3 | 0.01 | 0.00 | 0.94 | 0.00 | 0.05 | 0.11 |
| Adrar Bous | ADB/136/6/unmarked                      | Bifacial Foliate | 2 | 0.97 | 0.00 | 0.01 | 0.02 | 0.00 | 0.06 |
| Adrar Bous | ADB/136/6/unmarked<br>Side-scraper      | Retouched Flake  | 3 | 0.08 | 0.00 | 0.66 | 0.05 | 0.20 | 0.52 |
| Adrar Bous | ADB/136/6/unmarked                      | Bifacial Foliate | 2 | 0.96 | 0.00 | 0.00 | 0.03 | 0.01 | 0.08 |
| Adrar Bous | ADB/144/70/22T                          | Retouched Flake  | 1 | 0.00 | 0.00 | 0.32 | 0.68 | 0.00 | 0.44 |
| Adrar Bous | ADB/144/70/15T                          | Retouched Point  | 1 | 0.00 | 0.00 | 0.00 | 1.00 | 0.00 | 0.00 |
| Adrar Bous | ADB/144/2/X100P                         | Bifacial Foliate | 2 | 0.99 | 0.00 | 0.00 | 0.01 | 0.00 | 0.02 |
| Adrar Bous | ADB/144/2/14T                           | Retouched Point  | 1 | 0.00 | 0.00 | 0.00 | 1.00 | 0.00 | 0.00 |
| Adrar Bous | ADB/144/2/18T                           | Retouched Point  | 1 | 0.00 | 0.00 | 0.03 | 0.97 | 0.00 | 0.06 |
| Adrar Bous | ADB/144/2/20T                           | Retouched Point  | 2 | 0.94 | 0.00 | 0.00 | 0.05 | 0.00 | 0.11 |
| Adrar Bous | ADB/144/2/33T                           | Retouched Point  | 2 | 0.89 | 0.00 | 0.00 | 0.11 | 0.00 | 0.20 |
| Adrar Bous | ADB/144/3/unmarked                      | Retouched Point  | 1 | 0.00 | 0.00 | 0.13 | 0.85 | 0.02 | 0.26 |
| Adrar Bous | ADB/144/3/unmarked                      | Retouched Point  | 3 | 0.00 | 0.00 | 1.00 | 0.00 | 0.00 | 0.00 |
| Adrar Bous | ADB/144/3/unmarked                      | Retouched Flake  | 3 | 0.00 | 0.00 | 0.78 | 0.21 | 0.01 | 0.35 |
| Adrar Bous | ADB/144/3/unmarked                      | Retouched Point  | 1 | 0.00 | 0.00 | 0.35 | 0.65 | 0.00 | 0.46 |
| Adrar Bous | ADB/144/3/unmarked                      | Retouched Point  | 1 | 0.00 | 0.00 | 0.21 | 0.77 | 0.02 | 0.36 |
| Adrar Bous | ADB/144/1/5FL                           | Retouched Flake  | 5 | 0.00 | 0.00 | 0.00 | 0.00 | 1.00 | 0.00 |

|            |                                                                                                            |                  |   |                                           |      |      |      |      |      |
|------------|------------------------------------------------------------------------------------------------------------|------------------|---|-------------------------------------------|------|------|------|------|------|
| Adrar Bous | ADB/144/4/unmarked                                                                                         | Retouched Blade  | 3 | 0.02                                      | 0.00 | 0.98 | 0.00 | 0.00 | 0.04 |
| Adrar Bous | ADB/144/4/unmarked<br>Figure 5.18: 1 page<br>139; convergent side<br>scraper on blade                      | Retouched Blade  | 3 | 0.00                                      | 0.00 | 1.00 | 0.00 | 0.00 | 0.00 |
| Adrar Bous | ADB/144/4/unmarked                                                                                         | Retouched Blade  | 3 | 0.00                                      | 0.00 | 1.00 | 0.00 | 0.00 | 0.00 |
| Adrar Bous | ADB/144/4/unmarked                                                                                         | Retouched Blade  | 3 | 0.00                                      | 0.00 | 0.70 | 0.27 | 0.03 | 0.44 |
| Adrar Bous | ADB/144/4/unmarked                                                                                         | Retouched Blade  | 2 | 0.44                                      | 0.00 | 0.38 | 0.17 | 0.00 | 0.63 |
| Adrar Bous | ADB/144/4/unmarked                                                                                         | Retouched Blade  | 2 | 0.68                                      | 0.00 | 0.26 | 0.05 | 0.02 | 0.47 |
| Adrar Bous | ADB/153/1/29FP                                                                                             | Bifacial Foliate | 2 | 1.00                                      | 0.00 | 0.00 | 0.00 | 0.00 | 0.00 |
| Adrar Bous | ADB/153/1/unmarked                                                                                         | Bifacial Foliate | 2 | 0.98                                      | 0.00 | 0.00 | 0.02 | 0.00 | 0.04 |
| Adrar Bous | ADB/153/1/34T                                                                                              | Retouched Point  | 3 | 0.00                                      | 0.00 | 0.61 | 0.39 | 0.00 | 0.48 |
| Adrar Bous | ADB/153/2/16FP                                                                                             | Bifacial Foliate | 2 | 1.00                                      | 0.00 | 0.00 | 0.00 | 0.00 | 0.00 |
| Adrar Bous | ADB/153/2/30FB                                                                                             | Bifacial Foliate | 2 | 1.00                                      | 0.00 | 0.00 | 0.00 | 0.00 | 0.00 |
| Adrar Bous | ADB/153/2/28FP                                                                                             | Bifacial Foliate | 2 | 0.99                                      | 0.00 | 0.00 | 0.01 | 0.00 | 0.02 |
| Adrar Bous | ADB/153/2/unmarked                                                                                         | Retouched Point  | 2 | 0.98                                      | 0.00 | 0.00 | 0.02 | 0.00 | 0.04 |
| Adrar Bous | ADB/153/2/33U                                                                                              | Retouched Point  | 3 | 0.00                                      | 0.00 | 0.73 | 0.23 | 0.04 | 0.41 |
| Adrar Bous | ADB/153/2/unmarked                                                                                         | Retouched Point  | 1 | 0.00                                      | 0.00 | 0.08 | 0.78 | 0.15 | 0.36 |
| Adrar Bous | ADB/153/2/unmarked                                                                                         | Retouched Point  | 3 | 0.00                                      | 0.00 | 0.97 | 0.03 | 0.00 | 0.06 |
| Adrar Bous | ADB/153/3/unmarked<br>Figure 5.19: 1 page<br>140; double<br>convergent side<br>scraper on core<br>fragment | Retouched Flake  | 3 | 0.00                                      | 0.00 | 0.80 | 0.18 | 0.02 | 0.33 |
| Adrar Bous | ADB/153/3/2E                                                                                               | Retouched Blade  | 3 | 0.00                                      | 0.00 | 1.00 | 0.00 | 0.00 | 0.00 |
| Adrar Bous | ADB/153/3/unmarked                                                                                         | Retouched Flake  | 4 | 1.79<br>5588<br>3188<br>3787<br>e-<br>310 | 0.99 | 0.00 | 0.00 | 0.01 | 0.02 |
| Adrar Bous | ADB/153/3/1B                                                                                               | Dihedral Tool    | 4 | 0.00                                      | 1.00 | 0.00 | 0.00 | 0.00 | 0.00 |
| Adrar Bous | ADB/153/33A                                                                                                | Retouched Flake  | 3 | 0.00                                      | 0.00 | 1.00 | 0.00 | 0.00 | 0.00 |
| Adrar Bous | ADB/153/1TL Outil<br>ecaille                                                                               | Flake            | 5 | 0.00                                      | 0.00 | 0.00 | 0.00 | 1.00 | 0.00 |

|               |                                                                   |                     |   |      |      |      |      |      |      |
|---------------|-------------------------------------------------------------------|---------------------|---|------|------|------|------|------|------|
| Adrar<br>Bous | ADB/156/24T                                                       | Retouched<br>Flake  | 3 | 0.00 | 0.00 | 0.73 | 0.27 | 0.00 | 0.39 |
| Adrar<br>Bous | ADB/156/25T Figure<br>5.15: 4 page 136:<br>tanged 'nosed' scraper | Retouched<br>Flake  | 2 | 0.66 | 0.00 | 0.13 | 0.21 | 0.00 | 0.50 |
| Adrar<br>Bous | ADB/156/5T                                                        | Retouched<br>Blade  | 1 | 0.00 | 0.00 | 0.17 | 0.83 | 0.00 | 0.28 |
| Adrar<br>Bous | ADB/156/2                                                         | Retouched<br>Point  | 1 | 0.00 | 0.00 | 0.00 | 1.00 | 0.00 | 0.00 |
| Adrar<br>Bous | ADB/156/unmarked                                                  | Retouched<br>Flake  | 3 | 0.00 | 0.00 | 0.58 | 0.32 | 0.09 | 0.55 |
| Adrar<br>Bous | ADB/156/unmarked                                                  | Retouched<br>Flake  | 1 | 0.00 | 0.00 | 0.11 | 0.87 | 0.02 | 0.23 |
| Adrar<br>Bous | ADB/163/11/311                                                    | Retouched<br>Flake  | 5 | 0.00 | 0.00 | 0.00 | 0.00 | 1.00 | 0.00 |
| Adrar<br>Bous | ADB/163/1/232<br>"Lookout Hill"<br>Lupemban type<br>lanceolate    | Bifacial<br>Foliate | 2 | 0.99 | 0.00 | 0.00 | 0.01 | 0.00 | 0.02 |
| Adrar<br>Bous | ADB/163/13/233 Core<br>axe                                        | Core tool           | 2 | 0.91 | 0.00 | 0.09 | 0.00 | 0.00 | 0.16 |
| Adrar<br>Bous | ADB/163/12/242                                                    | Retouched<br>Flake  | 5 | 0.00 | 0.00 | 0.00 | 0.00 | 1.00 | 0.00 |
| Adrar<br>Bous | ADB/163/16/unmarke<br>d Core axe (bifacial)                       | Core tool           | 3 | 0.00 | 0.00 | 0.66 | 0.00 | 0.34 | 0.45 |
| Adrar<br>Bous | ADB/163/11/109                                                    | Bifacial<br>Foliate | 2 | 1.00 | 0.00 | 0.00 | 0.00 | 0.00 | 0.00 |
| Adrar<br>Bous | ADB/163/11/110                                                    | Bifacial<br>Foliate | 2 | 1.00 | 0.00 | 0.00 | 0.00 | 0.00 | 0.00 |
| Adrar<br>Bous | ADB/163/11/160                                                    | Retouched<br>Point  | 1 | 0.00 | 0.00 | 0.35 | 0.64 | 0.00 | 0.47 |
| Adrar<br>Bous | ADB/163/11/113                                                    | Bifacial<br>Foliate | 2 | 0.91 | 0.00 | 0.00 | 0.09 | 0.00 | 0.16 |
| Adrar<br>Bous | ADB/163/11/59                                                     | Retouched<br>Point  | 2 | 0.99 | 0.00 | 0.00 | 0.01 | 0.00 | 0.02 |
| Adrar<br>Bous | ADB/163/11/72-73                                                  | Bifacial<br>Foliate | 2 | 1.00 | 0.00 | 0.00 | 0.00 | 0.00 | 0.00 |
| Adrar<br>Bous | ADB/163/11/unmarke<br>d                                           | Bifacial<br>Foliate | 2 | 1.00 | 0.00 | 0.00 | 0.00 | 0.00 | 0.00 |
| Adrar<br>Bous | ADB/163/10/405                                                    | Retouched<br>Flake  | 3 | 0.00 | 0.00 | 0.91 | 0.07 | 0.02 | 0.17 |
| Adrar<br>Bous | ADB/163/14/303                                                    | Retouched<br>Flake  | 5 | 0.00 | 0.00 | 0.00 | 0.01 | 0.99 | 0.02 |
| Adrar<br>Bous | ADB/163/14/339                                                    | Retouched<br>Flake  | 3 | 0.00 | 0.00 | 1.00 | 0.00 | 0.00 | 0.00 |
| Adrar<br>Bous | ADB/163/14/299                                                    | Blade               | 3 | 0.00 | 0.00 | 0.99 | 0.01 | 0.00 | 0.02 |
| Adrar<br>Bous | ADB/163/14/297                                                    | Debordant<br>Flake  | 3 | 0.00 | 0.00 | 1.00 | 0.00 | 0.00 | 0.00 |
| Adrar<br>Bous | ADB/163/14/317                                                    | Retouched<br>Point  | 1 | 0.00 | 0.00 | 0.11 | 0.87 | 0.02 | 0.23 |
| Adrar<br>Bous | ADB/163/8/155                                                     | Retouched<br>Point  | 5 | 0.00 | 0.00 | 0.23 | 0.04 | 0.73 | 0.41 |

|               |                                                                                          |                     |   |      |      |      |      |      |      |
|---------------|------------------------------------------------------------------------------------------|---------------------|---|------|------|------|------|------|------|
| Adrar<br>Bous | ADB/163/8/139                                                                            | Core tool           | 3 | 0.00 | 0.00 | 1.00 | 0.00 | 0.00 | 0.00 |
| Adrar<br>Bous | ADB/163/8/49                                                                             | Bifacial<br>Foliate | 2 | 1.00 | 0.00 | 0.00 | 0.00 | 0.00 | 0.00 |
| Adrar<br>Bous | ADB/163/8/162                                                                            | Retouched<br>Point  | 4 | 0.00 | 0.71 | 0.29 | 0.00 | 0.00 | 0.41 |
| Adrar<br>Bous | ADB/164/342                                                                              | Retouched<br>Point  | 1 | 0.00 | 0.00 | 0.03 | 0.97 | 0.00 | 0.06 |
| Adrar<br>Bous | ADB/164/346                                                                              | Retouched<br>Point  | 1 | 0.00 | 0.00 | 0.19 | 0.81 | 0.00 | 0.31 |
| Adrar<br>Bous | ADB/164/327                                                                              | Retouched<br>Point  | 1 | 0.10 | 0.00 | 0.00 | 0.70 | 0.20 | 0.46 |
| Adrar<br>Bous | ADB/164/164                                                                              | Levallois<br>Point  | 4 | 0.00 | 1.00 | 0.00 | 0.00 | 0.00 | 0.00 |
| Adrar<br>Bous | ADB/164/293                                                                              | Retouched<br>Flake  | 5 | 0.00 | 0.00 | 0.00 | 0.00 | 1.00 | 0.00 |
| Adrar<br>Bous | ADB/164/253                                                                              | Core tool           | 2 | 1.00 | 0.00 | 0.00 | 0.00 | 0.00 | 0.00 |
| Adrar<br>Bous | ADB/164/192                                                                              | Core tool           | 2 | 1.00 | 0.00 | 0.00 | 0.00 | 0.00 | 0.00 |
| Adrar<br>Bous | ADB/164/329<br>"Yellowstone Hill"<br>Figure 5.8: 4 page 115<br>Double concave<br>scraper | Retouched<br>Flake  | 2 | 0.99 | 0.00 | 0.01 | 0.00 | 0.00 | 0.02 |
| Adrar<br>Bous | ADB/164/257 Core<br>axe (bifacial)                                                       | Core tool           | 2 | 0.83 | 0.00 | 0.16 | 0.00 | 0.01 | 0.29 |
| Adrar<br>Bous | ADB/164/10 Core axe<br>(bifacial)                                                        | Core tool           | 2 | 0.77 | 0.00 | 0.22 | 0.00 | 0.01 | 0.36 |
| Adrar<br>Bous | ADB/164/248 Core<br>axe (bifacial)                                                       | Core tool           | 2 | 0.97 | 0.00 | 0.01 | 0.01 | 0.01 | 0.06 |
| Adrar<br>Bous | ADB/165/314                                                                              | Retouched<br>Flake  | 3 | 0.00 | 0.00 | 0.58 | 0.00 | 0.42 | 0.49 |
| Adrar<br>Bous | ADB/165/158                                                                              | Retouched<br>Flake  | 5 | 0.00 | 0.00 | 0.19 | 0.12 | 0.69 | 0.47 |
| Adrar<br>Bous | ADB/165/2                                                                                | Retouched<br>Flake  | 2 | 0.94 | 0.00 | 0.00 | 0.05 | 0.01 | 0.11 |
| Adrar<br>Bous | ADB/165/5                                                                                | Retouched<br>Point  | 1 | 0.00 | 0.00 | 0.11 | 0.87 | 0.02 | 0.23 |
| Adrar<br>Bous | ADB/165/unmarked                                                                         | Retouched<br>Point  | 2 | 0.79 | 0.00 | 0.21 | 0.00 | 0.00 | 0.33 |
| Adrar<br>Bous | ADB/165/1                                                                                | Bifacial<br>Foliate | 2 | 1.00 | 0.00 | 0.00 | 0.00 | 0.00 | 0.00 |
| Adrar<br>Bous | ADB/165/9                                                                                | Retouched<br>Flake  | 3 | 0.00 | 0.00 | 0.57 | 0.41 | 0.02 | 0.51 |
| Adrar<br>Bous | ADB/165/221                                                                              | Retouched<br>Flake  | 3 | 0.00 | 0.00 | 0.68 | 0.31 | 0.01 | 0.44 |
| Adrar<br>Bous | ADB/165/350                                                                              | Retouched<br>Blade  | 3 | 0.00 | 0.00 | 1.00 | 0.00 | 0.00 | 0.00 |
| Adrar<br>Bous | ADB/165/391                                                                              | Retouched<br>Blade  | 1 | 0.00 | 0.00 | 0.39 | 0.61 | 0.00 | 0.48 |
| Adrar<br>Bous | ADB/165/4                                                                                | Bifacial<br>Foliate | 2 | 1.00 | 0.00 | 0.00 | 0.00 | 0.00 | 0.00 |

|            |                   |                  |   |      |      |      |      |      |      |
|------------|-------------------|------------------|---|------|------|------|------|------|------|
| Adrar Bous | ADB/89/17FP       | Bifacial Foliate | 2 | 0.94 | 0.00 | 0.06 | 0.00 | 0.00 | 0.11 |
| Adrar Bous | ADB/89/25FP       | Bifacial Foliate | 2 | 0.98 | 0.00 | 0.00 | 0.02 | 0.00 | 0.04 |
| Adrar Bous | ADB/89/unmarked   | Bifacial Foliate | 2 | 0.52 | 0.00 | 0.47 | 0.00 | 0.00 | 0.51 |
| Adrar Bous | ADB/89/31FP       | Bifacial Foliate | 2 | 1.00 | 0.00 | 0.00 | 0.00 | 0.00 | 0.00 |
| Adrar Bous | ADB/89/8FP        | Bifacial Foliate | 2 | 0.99 | 0.00 | 0.00 | 0.01 | 0.00 | 0.02 |
| Adrar Bous | ADB/89/14FP       | Bifacial Foliate | 2 | 0.85 | 0.00 | 0.12 | 0.02 | 0.00 | 0.26 |
| Adrar Bous | ADB/89/11FP       | Bifacial Foliate | 2 | 0.81 | 0.00 | 0.13 | 0.05 | 0.01 | 0.32 |
| Adrar Bous | ADB/89/4/5FP      | Bifacial Foliate | 2 | 0.99 | 0.00 | 0.00 | 0.01 | 0.00 | 0.02 |
| Adrar Bous | ADB/89/4/unmarked | Core tool        | 3 | 0.34 | 0.00 | 0.43 | 0.23 | 0.00 | 0.65 |
| Adrar Bous | ADB/89/4/unmarked | Retouched Flake  | 3 | 0.25 | 0.00 | 0.48 | 0.24 | 0.03 | 0.65 |
| Adrar Bous | ADB/89/1/unmarked | Retouched Point  | 3 | 0.00 | 0.00 | 1.00 | 0.00 | 0.00 | 0.00 |
| TH383      | 181               | Retouched Point  | 1 | 0.00 | 0.00 | 0.00 | 0.53 | 0.47 | 0.50 |
| TH383      | 146               | Retouched Flake  | 1 | 0.00 | 0.00 | 0.00 | 0.70 | 0.30 | 0.42 |
| TH383      | 284               | Retouched Flake  | 3 | 0.00 | 0.00 | 0.58 | 0.37 | 0.05 | 0.52 |
| TH383      | 915               | Retouched Flake  | 5 | 0.00 | 0.00 | 0.00 | 0.34 | 0.66 | 0.45 |
| TH383      | 11                | Retouched Flake  | 5 | 0.00 | 0.00 | 0.00 | 0.00 | 1.00 | 0.00 |
| TH383      | 116               | Retouched Point  | 5 | 0.00 | 0.00 | 0.00 | 0.00 | 1.00 | 0.00 |
| TH383      | 186               | Retouched Point  | 1 | 0.00 | 0.00 | 0.29 | 0.69 | 0.02 | 0.44 |
| TH383      | 928               | Retouched Point  | 1 | 0.00 | 0.00 | 0.24 | 0.74 | 0.03 | 0.39 |
| TH383      | 919               | Retouched Point  | 1 | 0.00 | 0.00 | 0.00 | 1.00 | 0.00 | 0.00 |
| TH383      | 4                 | Retouched Flake  | 5 | 0.00 | 0.00 | 0.00 | 0.01 | 0.99 | 0.02 |
| TH383      | 918               | Retouched Point  | 1 | 0.00 | 0.00 | 0.00 | 0.98 | 0.02 | 0.04 |
| TH383      | 10                | Retouched Point  | 1 | 0.00 | 0.00 | 0.09 | 0.89 | 0.02 | 0.20 |
| TH383      | 929               | Retouched Flake  | 5 | 0.00 | 0.00 | 0.00 | 0.21 | 0.79 | 0.33 |
| TH383      | 42                | Retouched Point  | 1 | 0.25 | 0.00 | 0.00 | 0.74 | 0.00 | 0.39 |
| TH383      | 43                | Retouched Point  | 1 | 0.00 | 0.00 | 0.00 | 0.74 | 0.26 | 0.38 |
| TH383      | 36                | Retouched Flake  | 5 | 0.00 | 0.00 | 0.00 | 0.13 | 0.87 | 0.23 |

|       |                          |                 |   |      |      |      |      |      |      |
|-------|--------------------------|-----------------|---|------|------|------|------|------|------|
| TH383 | 50                       | Retouched Point | 1 | 0.02 | 0.00 | 0.16 | 0.82 | 0.00 | 0.30 |
| TH383 | 620                      | Retouched Point | 1 | 0.01 | 0.00 | 0.00 | 0.97 | 0.02 | 0.06 |
| TH383 | 570                      | Retouched Point | 3 | 0.00 | 0.00 | 0.69 | 0.29 | 0.01 | 0.44 |
| TH383 | 49                       | Retouched Point | 1 | 0.00 | 0.00 | 0.00 | 1.00 | 0.00 | 0.00 |
| TH383 | 594                      | Retouched Point | 1 | 0.00 | 0.00 | 0.00 | 0.91 | 0.09 | 0.16 |
| TH383 | 35                       | Retouched Point | 3 | 0.00 | 0.00 | 0.75 | 0.25 | 0.00 | 0.38 |
| TH383 | 926                      | Retouched Point | 3 | 0.00 | 0.00 | 0.82 | 0.08 | 0.09 | 0.31 |
| TH383 | 584                      | Retouched Point | 1 | 0.00 | 0.00 | 0.47 | 0.50 | 0.03 | 0.53 |
| TH383 | 72                       | Debordant Flake | 3 | 0.00 | 0.00 | 0.92 | 0.07 | 0.01 | 0.15 |
| TH383 | 596                      | Debordant Flake | 3 | 0.00 | 0.00 | 0.92 | 0.08 | 0.00 | 0.15 |
| TH383 | 520                      | Retouched Flake | 5 | 0.00 | 0.00 | 0.46 | 0.00 | 0.54 | 0.50 |
| TH383 | 800                      | Retouched Flake | 3 | 0.00 | 0.00 | 1.00 | 0.00 | 0.00 | 0.00 |
| TH383 | 470                      | Retouched Flake | 5 | 0.00 | 0.00 | 0.12 | 0.27 | 0.62 | 0.53 |
| TH383 | 237                      | Retouched Flake | 1 | 0.15 | 0.00 | 0.08 | 0.77 | 0.01 | 0.38 |
| TH383 | 226                      | Retouched Flake | 5 | 0.00 | 0.00 | 0.00 | 0.00 | 1.00 | 0.00 |
| TH383 | 609                      | Retouched Flake | 5 | 0.00 | 0.00 | 0.00 | 0.00 | 1.00 | 0.00 |
| TH383 | 603                      | Retouched Flake | 5 | 0.00 | 0.00 | 0.24 | 0.00 | 0.76 | 0.36 |
| TH383 | 11                       | Debordant Flake | 3 | 0.00 | 0.00 | 1.00 | 0.00 | 0.00 | 0.00 |
| TH383 | 719                      | Debordant Flake | 3 | 0.00 | 0.00 | 1.00 | 0.00 | 0.00 | 0.00 |
| TH383 | 756                      | Retouched Flake | 3 | 0.00 | 0.00 | 0.85 | 0.15 | 0.00 | 0.26 |
| TH383 | 354                      | Retouched Flake | 3 | 0.00 | 0.00 | 0.84 | 0.16 | 0.00 | 0.27 |
| TH383 | 816                      | Retouched Flake | 3 | 0.00 | 0.00 | 0.99 | 0.00 | 0.01 | 0.02 |
| TH383 | 494                      | Retouched Blade | 3 | 0.00 | 0.00 | 0.92 | 0.01 | 0.07 | 0.15 |
| TH383 | 572                      | Retouched Flake | 3 | 0.12 | 0.00 | 0.76 | 0.08 | 0.05 | 0.40 |
| TH383 | 76                       | Retouched Flake | 1 | 0.00 | 0.00 | 0.13 | 0.71 | 0.16 | 0.45 |
| TH383 | 695 atypical end scraper | Retouched Flake | 3 | 0.00 | 0.00 | 0.88 | 0.00 | 0.12 | 0.21 |
| TH383 | 447                      | Debordant Flake | 3 | 0.00 | 0.00 | 0.94 | 0.05 | 0.01 | 0.11 |

|            |          |                     |   |      |      |                              |      |      |      |
|------------|----------|---------------------|---|------|------|------------------------------|------|------|------|
| TH383      | 233      | Debordant<br>Flake  | 3 | 0.00 | 0.00 | 0.85                         | 0.00 | 0.15 | 0.26 |
| TH383      | 279      | Debordant<br>Flake  | 5 | 0.00 | 0.00 | 0.00                         | 0.00 | 1.00 | 0.00 |
| TH383      | 781      | Debordant<br>Flake  | 3 | 0.00 | 0.00 | 0.57                         | 0.42 | 0.01 | 0.50 |
| TH383      | 916      | Debordant<br>Flake  | 5 | 0.00 | 0.00 | 0.18                         | 0.02 | 0.80 | 0.33 |
| TH383      | unmarked | Retouched<br>Flake  | 3 | 0.00 | 0.00 | 0.59                         | 0.00 | 0.41 | 0.48 |
| TH383      | unmarked | Debordant<br>Flake  | 3 | 0.00 | 0.00 | 0.94                         | 0.00 | 0.06 | 0.11 |
| TH383      | 553      | Retouched<br>Flake  | 3 | 0.00 | 0.00 | 0.95                         | 0.00 | 0.05 | 0.10 |
| TH383      | 306      | Debordant<br>Flake  | 5 | 0.00 | 0.00 | 0.33                         | 0.00 | 0.67 | 0.44 |
| TH383      | 48       | Retouched<br>Flake  | 5 | 0.00 | 0.00 | 0.02                         | 0.00 | 0.98 | 0.04 |
| TH383      | unmarked | Debordant<br>Flake  | 3 | 0.01 | 0.00 | 0.77                         | 0.00 | 0.21 | 0.36 |
| TH383      | 690      | Retouched<br>Flake  | 3 | 0.00 | 0.00 | 0.90                         | 0.04 | 0.06 | 0.18 |
| TH383      | 767      | Retouched<br>Flake  | 3 | 0.00 | 0.00 | 0.96                         | 0.02 | 0.02 | 0.08 |
| TH383      | 804      | Retouched<br>Flake  | 5 | 0.00 | 0.00 | 0.00                         | 0.00 | 1.00 | 0.00 |
| TH383      | 930      | Retouched<br>Flake  | 5 | 0.00 | 0.00 | 0.00                         | 0.00 | 1.00 | 0.00 |
| TH383      | 8        | Retouched<br>Flake  | 3 | 0.00 | 0.00 | 0.84                         | 0.02 | 0.14 | 0.27 |
| TH383      | 601      | Retouched<br>Flake  | 5 | 0.00 | 0.00 | 0.00                         | 0.00 | 1.00 | 0.00 |
| TH383      | 219      | Debordant<br>Flake  | 5 | 0.00 | 0.00 | 0.01                         | 0.00 | 0.99 | 0.02 |
| TH383      | 335      | Retouched<br>Flake  | 1 | 0.00 | 0.00 | 0.15                         | 0.69 | 0.16 | 0.48 |
| TH383      | 766      | Retouched<br>Flake  | 5 | 0.00 | 0.00 | 0.16                         | 0.01 | 0.84 | 0.27 |
| Sai Island | SO4/75/d | Biface              | 2 | 0.97 | 0.00 | 0.00                         | 0.02 | 0.00 | 0.06 |
| Sai Island | SO4/75/m | Flake               | 5 | 0.00 | 0.00 | 0.00                         | 0.00 | 1.00 | 0.00 |
| Sai Island | SO4/75/b | Flake               |   |      |      | 1.89<br>7181<br>9953<br>6927 |      |      |      |
|            |          |                     | 4 | 0.00 | 1.00 | e-311                        | 0.00 | 0.00 | 0.00 |
| Sai Island | So4/36-1 | Biface              | 2 | 0.96 | 0.00 | 0.04                         | 0.00 | 0.00 | 0.08 |
| Sai Island | SO4/30/b | Biface              | 5 | 0.08 | 0.00 | 0.27                         | 0.01 | 0.65 | 0.50 |
| Sai Island | SO4/30/e | Biface              | 2 | 0.90 | 0.00 | 0.01                         | 0.00 | 0.08 | 0.18 |
| Sai Island | SO4/20/3 | Bifacial<br>Foliate | 2 | 0.85 | 0.00 | 0.00                         | 0.15 | 0.00 | 0.26 |
| Sai Island | SO4/16/f | Biface              | 2 | 0.94 | 0.00 | 0.04                         | 0.00 | 0.02 | 0.11 |

|            |                                                                       |                     |   |      |      |      |      |      |      |
|------------|-----------------------------------------------------------------------|---------------------|---|------|------|------|------|------|------|
| Sai Island | SO4/16/a                                                              | Bifacial<br>Foliate | 2 | 0.85 | 0.00 | 0.01 | 0.14 | 0.00 | 0.26 |
| Sai Island | SO4/16/h                                                              | Bifacial<br>Foliate | 2 | 0.94 | 0.00 | 0.04 | 0.00 | 0.02 | 0.11 |
| Sai Island | SO2/157-1 Retouched                                                   | Janus Flake         | 4 | 0.00 | 1.00 | 0.00 | 0.00 | 0.00 | 0.00 |
| Sai Island | SO2/140-3 Core axe                                                    | Core tool           | 2 | 0.96 | 0.00 | 0.04 | 0.00 | 0.00 | 0.08 |
| Sai Island | SO2/140-2                                                             | Bifacial<br>Foliate | 2 | 0.85 | 0.00 | 0.05 | 0.09 | 0.01 | 0.27 |
| Sai Island | SO2/138-2                                                             | Biface              | 2 | 0.76 | 0.00 | 0.04 | 0.10 | 0.09 | 0.40 |
| Sai Island | SO2/133-2                                                             | Retouched<br>Flake  | 3 | 0.38 | 0.00 | 0.54 | 0.01 | 0.06 | 0.56 |
| Wadi Gan   | 52.235                                                                | Bifacial<br>Foliate | 2 | 0.87 | 0.00 | 0.11 | 0.02 | 0.00 | 0.23 |
| Wadi Gan   | 52.235                                                                | Retouched<br>Flake  | 5 | 0.00 | 0.00 | 0.00 | 0.01 | 0.99 | 0.02 |
| Wadi Gan   | 52.235                                                                | Retouched<br>Flake  | 5 | 0.00 | 0.00 | 0.08 | 0.02 | 0.90 | 0.18 |
| Wadi Gan   | 52.235                                                                | Retouched<br>Flake  | 3 | 0.01 | 0.00 | 0.98 | 0.00 | 0.01 | 0.04 |
| Wadi Gan   | 52.235 Thick end<br>scraper                                           | Retouched<br>Flake  | 4 | 0.00 | 1.00 | 0.00 | 0.00 | 0.00 | 0.00 |
| Wadi Gan   | 52.234                                                                | Retouched<br>Flake  | 1 | 0.00 | 0.00 | 0.00 | 1.00 | 0.00 | 0.00 |
| Wadi Gan   | 52.234                                                                | Retouched<br>Flake  | 3 | 0.00 | 0.00 | 0.62 | 0.01 | 0.37 | 0.48 |
| Wadi Gan   | 52.234                                                                | Retouched<br>Flake  | 1 | 0.00 | 0.00 | 0.00 | 0.99 | 0.00 | 0.02 |
| Wadi Gan   | 52.234                                                                | Retouched<br>Flake  | 3 | 0.00 | 0.00 | 0.94 | 0.01 | 0.06 | 0.11 |
| Wadi Gan   | 52.234                                                                | Retouched<br>Flake  | 1 | 0.00 | 0.00 | 0.00 | 1.00 | 0.00 | 0.00 |
| Wadi Gan   | 52.234                                                                | Retouched<br>Flake  | 5 | 0.00 | 0.00 | 0.00 | 0.37 | 0.63 | 0.47 |
| Wadi Gan   | 52.234 In McBurney<br>and Hey fig 33:8;<br>convergent side<br>scraper | Retouched<br>Flake  | 1 | 0.00 | 0.00 | 0.01 | 0.99 | 0.00 | 0.02 |
| Wadi Gan   | 52.234                                                                | Retouched<br>Flake  | 3 | 0.00 | 0.00 | 0.79 | 0.15 | 0.06 | 0.35 |
| Wadi Gan   | 52.234                                                                | Retouched<br>Flake  | 5 | 0.02 | 0.00 | 0.20 | 0.16 | 0.61 | 0.56 |
| Wadi Gan   | 52.234                                                                | Retouched<br>Flake  | 3 | 0.00 | 0.00 | 0.91 | 0.00 | 0.09 | 0.16 |
| Wadi Gan   | 52.234                                                                | Bifacial<br>Foliate | 2 | 0.87 | 0.00 | 0.11 | 0.02 | 0.00 | 0.23 |
| Wadi Gan   | 52.234                                                                | Retouched<br>Flake  | 1 | 0.00 | 0.00 | 0.01 | 0.97 | 0.02 | 0.06 |
| Wadi Gan   | 52.234                                                                | Retouched<br>Flake  | 3 | 0.00 | 0.00 | 0.97 | 0.02 | 0.00 | 0.06 |
| Wadi Gan   | 52.234                                                                | Retouched<br>Flake  | 5 | 0.02 | 0.00 | 0.20 | 0.16 | 0.61 | 0.56 |
| Wadi Gan   | 52.234                                                                | Retouched<br>Flake  | 5 | 0.00 | 0.00 | 0.03 | 0.00 | 0.97 | 0.06 |

|          |        |                    |   |      |      |      |      |      |      |
|----------|--------|--------------------|---|------|------|------|------|------|------|
| Wadi Gan | 52.234 | Retouched<br>Flake | 3 | 0.00 | 0.00 | 0.85 | 0.11 | 0.04 | 0.26 |
| Wadi Gan | 52.234 | Retouched<br>Blade | 3 | 0.00 | 0.00 | 1.00 | 0.00 | 0.00 | 0.00 |
| Wadi Gan | 52.234 | Retouched<br>Flake | 4 | 0.00 | 0.98 | 0.00 | 0.00 | 0.02 | 0.04 |
| Wadi Gan | 52.234 | Retouched<br>Flake | 3 | 0.00 | 0.00 | 0.82 | 0.15 | 0.04 | 0.30 |
| Wadi Gan | 52.234 | Retouched<br>Flake | 5 | 0.00 | 0.00 | 0.05 | 0.00 | 0.95 | 0.10 |
| Wadi Gan | 52.234 | Retouched<br>Point | 1 | 0.00 | 0.00 | 0.01 | 0.99 | 0.00 | 0.02 |
| Wadi Gan | 52.234 | Retouched<br>Flake | 1 | 0.00 | 0.00 | 0.03 | 0.96 | 0.01 | 0.08 |
| Wadi Gan | 52.234 | Retouched<br>Flake | 4 | 0.00 | 1.00 | 0.00 | 0.00 | 0.00 | 0.00 |
| Wadi Gan | 52.234 | Retouched<br>Flake | 5 | 0.00 | 0.00 | 0.25 | 0.02 | 0.74 | 0.39 |
| Wadi Gan | 52.234 | Retouched<br>Flake | 5 | 0.00 | 0.00 | 0.03 | 0.00 | 0.97 | 0.06 |
| Wadi Gan | 52.234 | Retouched<br>Flake | 5 | 0.00 | 0.00 | 0.12 | 0.41 | 0.47 | 0.60 |
| Wadi Gan | 52.234 | Retouched<br>Flake | 5 | 0.00 | 0.00 | 0.39 | 0.00 | 0.61 | 0.48 |
| Wadi Gan | 52.234 | Retouched<br>Flake | 5 | 0.00 | 0.00 | 0.02 | 0.03 | 0.95 | 0.10 |
| Wadi Gan | 52.234 | Retouched<br>Flake | 5 | 0.00 | 0.00 | 0.00 | 0.00 | 1.00 | 0.00 |
| Wadi Gan | 52.234 | Retouched<br>Flake | 5 | 0.00 | 0.00 | 0.00 | 0.00 | 1.00 | 0.00 |
| Wadi Gan | 52.234 | Retouched<br>Flake | 5 | 0.00 | 0.00 | 0.00 | 0.00 | 1.00 | 0.00 |
| Wadi Gan | 52.234 | Retouched<br>Flake | 5 | 0.00 | 0.00 | 0.03 | 0.02 | 0.95 | 0.10 |
| Wadi Gan | 52.234 | Retouched<br>Flake | 3 | 0.00 | 0.00 | 0.87 | 0.10 | 0.03 | 0.23 |
| Wadi Gan | 52.234 | Retouched<br>Flake | 5 | 0.00 | 0.00 | 0.00 | 0.00 | 1.00 | 0.00 |
| Wadi Gan | 52.234 | Retouched<br>Flake | 5 | 0.00 | 0.00 | 0.39 | 0.17 | 0.44 | 0.63 |
| Wadi Gan | 52.234 | Retouched<br>Flake | 3 | 0.00 | 0.00 | 0.86 | 0.00 | 0.14 | 0.24 |
| Wadi Gan | 52.234 | Retouched<br>Flake | 2 | 0.56 | 0.00 | 0.00 | 0.44 | 0.01 | 0.49 |
| Wadi Gan | 52.234 | Retouched<br>Flake | 5 | 0.00 | 0.00 | 0.00 | 0.00 | 1.00 | 0.00 |
| Wadi Gan | 52.234 | Retouched<br>Point | 1 | 0.00 | 0.00 | 0.01 | 0.99 | 0.00 | 0.02 |
| Wadi Gan | 52.234 | Retouched<br>Flake | 1 | 0.00 | 0.00 | 0.14 | 0.85 | 0.01 | 0.26 |
| Wadi Gan | 52.234 | Retouched<br>Flake | 3 | 0.00 | 0.00 | 0.97 | 0.00 | 0.03 | 0.06 |

|                |                    |                     |   |      |      |      |      |      |      |
|----------------|--------------------|---------------------|---|------|------|------|------|------|------|
| Contrebandiers | TM76 C.10 H21. 171 | Bifacial<br>Foliate | 2 | 0.92 | 0.00 | 0.03 | 0.00 | 0.05 | 0.15 |
| Contrebandiers | TM76 C.10 H21.995  | Bifacial<br>Foliate | 2 | 0.97 | 0.00 | 0.03 | 0.00 | 0.00 | 0.06 |
| Contrebandiers | TM76 C.10 H21.339  | Bifacial<br>Foliate | 2 | 0.80 | 0.00 | 0.03 | 0.01 | 0.17 | 0.33 |
| Contrebandiers | TM75 C.11 J21.11   | Bifacial<br>Foliate | 5 | 0.28 | 0.00 | 0.01 | 0.00 | 0.71 | 0.42 |
| Contrebandiers | TM75 C.11 J21.4    | Bifacial<br>Foliate | 2 | 0.80 | 0.00 | 0.03 | 0.01 | 0.17 | 0.33 |
| Contrebandiers | TM76 C.10 J21. 353 | Retouched<br>Flake  | 3 | 0.00 | 0.00 | 0.61 | 0.10 | 0.29 | 0.53 |
| Contrebandiers | TM76 C.10 H21. 109 | Retouched<br>Flake  | 2 | 0.69 | 0.00 | 0.00 | 0.31 | 0.00 | 0.43 |
| Contrebandiers | TM76 C.9 H21.32    | Retouched<br>Flake  | 3 | 0.00 | 0.00 | 0.87 | 0.10 | 0.03 | 0.23 |
| Contrebandiers | TM76 C.9 H21.14    | Retouched<br>Flake  | 2 | 0.84 | 0.00 | 0.00 | 0.14 | 0.02 | 0.27 |
| Contrebandiers | TM76 C.9 H21.77    | Retouched<br>Flake  | 5 | 0.00 | 0.00 | 0.00 | 0.00 | 1.00 | 0.00 |
| Contrebandiers | TM76 C.10 J21.157  | Retouched<br>Flake  | 3 | 0.00 | 0.00 | 0.92 | 0.02 | 0.06 | 0.15 |
| Contrebandiers | TM76 C.10 J21.474  | Retouched<br>Flake  | 3 | 0.00 | 0.00 | 0.70 | 0.12 | 0.18 | 0.46 |
| Contrebandiers | TM76 C.10 J21.286  | Retouched<br>Flake  | 1 | 0.00 | 0.00 | 0.00 | 1.00 | 0.00 | 0.00 |
| Contrebandiers | TM76 C.10 H21.211  | Retouched<br>Flake  | 5 | 0.00 | 0.00 | 0.00 | 0.00 | 1.00 | 0.00 |
| Contrebandiers | TM76 C.10 H21.61   | Retouched<br>Flake  | 2 | 0.90 | 0.00 | 0.00 | 0.10 | 0.00 | 0.18 |
| Contrebandiers | TM76 J21           | Retouched<br>Flake  | 2 | 0.64 | 0.00 | 0.00 | 0.36 | 0.00 | 0.46 |
| Contrebandiers | TM76 H21.C11.901   | Retouched<br>Point  | 5 | 0.00 | 0.00 | 0.00 | 0.00 | 1.00 | 0.00 |
| Contrebandiers | TM76 C.10 J21.339  | Retouched<br>Flake  | 3 | 0.00 | 0.00 | 0.76 | 0.04 | 0.19 | 0.38 |
| Contrebandiers | TM76 C.9 H21.33    | Retouched<br>Blade  | 2 | 0.95 | 0.00 | 0.05 | 0.00 | 0.00 | 0.10 |
| Contrebandiers | TM76 C.9 H21.276   | Retouched<br>Point  | 1 | 0.01 | 0.00 | 0.00 | 0.82 | 0.17 | 0.30 |
| Contrebandiers | TM75 C.11 J21.5    | Bifacial<br>Foliate | 2 | 0.43 | 0.00 | 0.43 | 0.00 | 0.14 | 0.61 |
| Haua Fteah     | 55-112.2           | Biface              | 5 | 0.46 | 0.00 | 0.00 | 0.01 | 0.53 | 0.51 |
| Haua Fteah     | 52.33.1            | Biface              | 5 | 0.46 | 0.00 | 0.00 | 0.01 | 0.53 | 0.51 |
| Haua Fteah     | 52-35.4            | Biface              | 2 | 0.64 | 0.00 | 0.01 | 0.01 | 0.34 | 0.47 |
| Haua Fteah     | 55-112             | Retouched<br>Flake  | 5 | 0.00 | 0.00 | 0.00 | 0.00 | 1.00 | 0.00 |
| Haua Fteah     | 52-36.2373         | Retouched<br>Flake  | 5 | 0.00 | 0.00 | 0.00 | 0.00 | 1.00 | 0.00 |
| Haua Fteah     | 55-112.2395        | Levallois<br>Flake  | 4 | 0.00 | 1.00 | 0.00 | 0.00 | 0.00 | 0.00 |

|               |                                                                                   |                    |   |      |      |      |      |      |      |
|---------------|-----------------------------------------------------------------------------------|--------------------|---|------|------|------|------|------|------|
| Haua<br>Fteah | 55-112.2396                                                                       | Levallois<br>Flake | 4 | 0.00 | 1.00 | 0.00 | 0.00 | 0.00 | 0.00 |
| Haua<br>Fteah | 55-112.964                                                                        | Levallois<br>Blade | 4 | 0.00 | 1.00 | 0.00 | 0.00 | 0.00 | 0.00 |
| Haua<br>Fteah | 55-112.2393                                                                       | Levallois<br>Blade | 4 | 0.00 | 1.00 | 0.00 | 0.00 | 0.00 | 0.00 |
| Haua<br>Fteah | 55-112.991                                                                        | Retouched<br>Blade | 1 | 0.00 | 0.00 | 0.49 | 0.51 | 0.00 | 0.50 |
| Haua<br>Fteah | 55-112.976                                                                        | Retouched<br>Flake | 5 | 0.00 | 0.00 | 0.08 | 0.02 | 0.90 | 0.18 |
| Haua<br>Fteah | 55-112.970                                                                        | Retouched<br>Flake | 5 | 0.00 | 0.00 | 0.00 | 0.00 | 1.00 | 0.00 |
| Haua<br>Fteah | 55-112.1005                                                                       | Retouched<br>Flake | 5 | 0.00 | 0.00 | 0.00 | 0.00 | 1.00 | 0.00 |
| Haua<br>Fteah | 55-112.1006                                                                       | Retouched<br>Flake | 1 | 0.00 | 0.00 | 0.00 | 0.98 | 0.02 | 0.04 |
| Haua<br>Fteah | 55-112.1002<br>Convergent side<br>scraper                                         | Retouched<br>Flake | 1 | 0.17 | 0.00 | 0.00 | 0.76 | 0.07 | 0.39 |
| Haua<br>Fteah | 55-112.982                                                                        | Retouched<br>Flake | 5 | 0.00 | 0.00 | 0.07 | 0.02 | 0.91 | 0.17 |
| Haua<br>Fteah | 55-112.978 Truncated<br>Faceted Piece                                             | Retouched<br>Flake | 5 | 0.00 | 0.00 | 0.00 | 0.00 | 1.00 | 0.00 |
| Haua<br>Fteah | 55-112.977                                                                        | Retouched<br>Flake | 5 | 0.00 | 0.00 | 0.06 | 0.00 | 0.94 | 0.11 |
| Haua<br>Fteah | 55-112.993 end<br>scraper on proximal                                             | Retouched<br>Flake | 5 | 0.00 | 0.00 | 0.00 | 0.00 | 1.00 | 0.00 |
| Haua<br>Fteah | 55-112.990 bifacially<br>retouched convergent<br>side scraper                     | Retouched<br>Flake | 3 | 0.08 | 0.00 | 0.66 | 0.05 | 0.20 | 0.52 |
| Haua<br>Fteah | 55-112.980<br>Convergent Side<br>Scraper, looks<br>'Aterianish' because of<br>DSP | Retouched<br>Flake | 5 | 0.00 | 0.00 | 0.00 | 0.00 | 1.00 | 0.00 |
| Haua<br>Fteah | 55-112.972                                                                        | Retouched<br>Flake | 5 | 0.00 | 0.00 | 0.00 | 0.26 | 0.74 | 0.38 |
| Haua<br>Fteah | 55-112.1009 tiny side<br>scraper                                                  | Retouched<br>Flake | 5 | 0.00 | 0.00 | 0.00 | 0.00 | 1.00 | 0.00 |
| Haua<br>Fteah | 55-112.984<br>Convergent side<br>scraper or limace,<br>resharpened                | Retouched<br>Flake | 1 | 0.00 | 0.00 | 0.03 | 0.97 | 0.00 | 0.06 |
| Haua<br>Fteah | 55-112.979                                                                        | Retouched<br>Flake | 2 | 0.97 | 0.00 | 0.00 | 0.00 | 0.03 | 0.06 |
| Haua<br>Fteah | 55-112.987 convex<br>side scraper                                                 | Retouched<br>Flake | 3 | 0.00 | 0.00 | 0.78 | 0.04 | 0.18 | 0.36 |
| Haua<br>Fteah | 55-112.1007 small side<br>scraper on blade                                        | Retouched<br>Flake | 3 | 0.00 | 0.00 | 0.94 | 0.01 | 0.05 | 0.11 |
| Haua<br>Fteah | 55-112.1004 small side<br>scraper                                                 | Retouched<br>Flake | 5 | 0.00 | 0.00 | 0.06 | 0.00 | 0.94 | 0.11 |
| Haua<br>Fteah | 55-112 unifacial<br>focolate                                                      | Retouched<br>Point | 1 | 0.00 | 0.00 | 0.00 | 1.00 | 0.00 | 0.00 |

|               |                                                                                                       |                    |   |      |      |      |      |      |      |
|---------------|-------------------------------------------------------------------------------------------------------|--------------------|---|------|------|------|------|------|------|
| Haua<br>Fteah | 55-112 end scraper                                                                                    | Retouched<br>Flake | 3 | 0.00 | 0.00 | 0.51 | 0.49 | 0.01 | 0.50 |
| Haua<br>Fteah | 52-36.1074                                                                                            | Retouched<br>Flake | 5 | 0.00 | 0.00 | 0.00 | 0.00 | 1.00 | 0.00 |
| Haua<br>Fteah | 52-36.1080                                                                                            | Retouched<br>Flake | 5 | 0.00 | 0.00 | 0.12 | 0.00 | 0.88 | 0.21 |
| Haua<br>Fteah | 52-36.2378                                                                                            | Retouched<br>Flake | 5 | 0.00 | 0.00 | 0.39 | 0.00 | 0.60 | 0.49 |
| Haua<br>Fteah | 52-36.1049                                                                                            | Retouched<br>Flake | 5 | 0.00 | 0.00 | 0.04 | 0.00 | 0.96 | 0.08 |
| Haua<br>Fteah | 52-36.1051                                                                                            | Retouched<br>Flake | 5 | 0.00 | 0.00 | 0.00 | 0.00 | 1.00 | 0.00 |
| Haua<br>Fteah | 55-112.2<br>Ref p.110 drawing 2:<br>"hybrid Mousterian";<br>oblique end scraper                       | Retouched<br>Flake | 3 | 0.00 | 0.00 | 0.78 | 0.02 | 0.20 | 0.35 |
| Haua<br>Fteah | 55-47.9 Ref p.110<br>drawing 9: "hybrid<br>Mousterian": tanged<br>angle burin                         | Retouched<br>Flake | 4 | 0.00 | 1.00 | 0.00 | 0.00 | 0.00 | 0.00 |
| Haua<br>Fteah | 55-111.13 Ref p.110<br>drawing 13: "hybrid<br>Mousterian"; 'angle<br>burin'                           | Retouched<br>Flake | 4 | 0.00 | 1.00 | 0.00 | 0.00 | 0.00 | 0.00 |
| Haua<br>Fteah | 55-36.10 Ref p.110<br>drawing 10: "hybrid<br>Mousterian"; 'angle<br>burin'                            | Retouched<br>Flake | 5 | 0.00 | 0.23 | 0.00 | 0.00 | 0.77 | 0.35 |
| Haua<br>Fteah | 55-112.1 Ref p.110<br>drawing 1: "hybrid<br>Mousterian"; 'Oblique<br>end scraper'                     | Retouched<br>Flake | 5 | 0.00 | 0.00 | 0.01 | 0.00 | 0.98 | 0.04 |
| Haua<br>Fteah | 55-36.16 Ref p.110<br>drawing 16: "hybrid<br>Mousterian"; 'bec de<br>flute burin'                     | Retouched<br>Flake | 4 | 0.00 | 1.00 | 0.00 | 0.00 | 0.00 | 0.00 |
| Haua<br>Fteah | 55-111.8 Ref p.110<br>drawing 8: "hybrid<br>Mousterian";<br>'unfinished or spoiled<br>biface' but it' | Retouched<br>Flake | 1 | 0.00 | 0.00 | 0.01 | 0.98 | 0.02 | 0.04 |
| Haua<br>Fteah | 55-111.12 Ref p.110<br>drawing 12: "hybrid<br>Mousterian"; 'angle<br>burin'                           | Retouched<br>Flake | 4 | 0.00 | 1.00 | 0.00 | 0.00 | 0.00 | 0.00 |
| Haua<br>Fteah | 55-110.11 Ref p.110<br>drawing 11: "hybrid<br>Mousterian"; 'angle<br>burin'                           | Retouched<br>Flake | 4 | 0.00 | 1.00 | 0.00 | 0.00 | 0.00 | 0.00 |
| Haua<br>Fteah | 52-35.1 Ref p.111<br>drawing 1: "hybrid<br>Mousterian"; 'notched<br>flake'; has retouched<br>proxima  | Retouched<br>Flake | 5 | 0.00 | 0.00 | 0.00 | 0.00 | 1.00 | 0.00 |

|               |                                                                                            |                    |   |      |      |      |      |      |      |
|---------------|--------------------------------------------------------------------------------------------|--------------------|---|------|------|------|------|------|------|
| Haua<br>Fteah | 52-33.3 Ref p.111<br>drawing 3: "hybrid<br>Mousterian"; 'notched<br>flake'                 | Retouched<br>Flake | 5 | 0.00 | 0.00 | 0.00 | 0.00 | 1.00 | 0.00 |
| Haua<br>Fteah | 52-36.2 Ref p.111<br>drawing 2: "hybrid<br>Mousterian";<br>'rectangular scraper'           | Retouched<br>Flake | 5 | 0.00 | 0.00 | 0.23 | 0.00 | 0.77 | 0.35 |
| Haua<br>Fteah | 55-47.4                                                                                    | Retouched<br>Flake | 5 | 0.00 | 0.00 | 0.00 | 0.00 | 1.00 | 0.00 |
| Haua<br>Fteah | 55-111.15 Ref p.110<br>drawing 2: "hybrid<br>Mousterian"; 'angle<br>burin'                 | Retouched<br>Flake | 5 | 0.00 | 0.23 | 0.00 | 0.00 | 0.77 | 0.35 |
| Haua<br>Fteah | 55-112.18 Ref p.110<br>drawing 18: "hybrid<br>Mousterian": 'angle<br>burin'                | Retouched<br>Flake | 4 | 0.00 | 0.86 | 0.00 | 0.00 | 0.14 | 0.24 |
| Haua<br>Fteah | 52-36.17 Ref p.110<br>drawing 2: "hybrid<br>Mousterian": 'bec de<br>flute' burin           | Retouched<br>Flake | 4 | 0.00 | 1.00 | 0.00 | 0.00 | 0.00 | 0.00 |
| Haua<br>Fteah | 52-36.14 mislabelled;<br>actually p.110 no.14;<br>'angle burin'                            | Retouched<br>Flake | 4 | 0.00 | 0.99 | 0.00 | 0.00 | 0.01 | 0.02 |
| Haua<br>Fteah | 55-48.4 Ref p.110<br>drawing 4: "hybrid<br>Mousterian"; 'angle<br>burin'                   | Retouched<br>Flake | 4 | 0.00 | 1.00 | 0.00 | 0.00 | 0.00 | 0.00 |
| Haua<br>Fteah | 55-48                                                                                      | Retouched<br>Flake | 5 | 0.00 | 0.00 | 0.00 | 0.00 | 1.00 | 0.00 |
| Haua<br>Fteah | 55-112.14 Ref p.109<br>drawing 14: "evolved<br>hybrid Mousterian"<br>atypical end scraper  | Retouched<br>Flake | 3 | 0.04 | 0.00 | 0.96 | 0.00 | 0.00 | 0.08 |
| Haua<br>Fteah | 52-35.9 Ref p.109<br>drawing 9: "evolved<br>hybrid Mousterian";<br>typical end scraper     | Retouched<br>Flake | 5 | 0.00 | 0.00 | 0.28 | 0.01 | 0.71 | 0.42 |
| Haua<br>Fteah | 55-111.5 Ref p.109<br>drawing 5: "evolved<br>hybrid Mousterian";<br>typical end scraper    | Retouched<br>Flake | 5 | 0.00 | 0.00 | 0.00 | 0.00 | 1.00 | 0.00 |
| Haua<br>Fteah | 55-111.4 Ref p.109<br>drawing 4: "evolved<br>hybrid Mousterian";<br>typical end scraper    | Retouched<br>Flake | 5 | 0.00 | 0.00 | 0.28 | 0.01 | 0.71 | 0.42 |
| Haua<br>Fteah | 55-112.12 Ref p.109<br>drawing 12: "evolved<br>hybrid Mousterian";<br>atypical end scraper | Retouched<br>Flake | 5 | 0.00 | 0.00 | 0.00 | 0.00 | 1.00 | 0.00 |
| Haua<br>Fteah | 55-112.15 Ref p.109<br>drawing 15: "evolved                                                | Retouched<br>Flake | 3 | 0.00 | 0.00 | 0.99 | 0.01 | 0.00 | 0.02 |

|               |                                                                                                         |                    |   |      |      |      |      |      |      |
|---------------|---------------------------------------------------------------------------------------------------------|--------------------|---|------|------|------|------|------|------|
|               | hybrid Mousterian";<br>atypical end scraper                                                             |                    |   |      |      |      |      |      |      |
| Haua<br>Fteah | 55-112.8 Ref p.109<br>drawing 8: "evolved<br>hybrid Mousterian";<br>typical end scraper                 | Retouched<br>Flake | 3 | 0.00 | 0.00 | 0.62 | 0.01 | 0.37 | 0.48 |
| Haua<br>Fteah | 52-35.2 Ref p.109<br>drawing 2: "evolved<br>hybrid Mousterian";<br>end scraper with notch               | Retouched<br>Flake | 5 | 0.00 | 0.00 | 0.28 | 0.01 | 0.71 | 0.42 |
| Haua<br>Fteah | 55-112.13 Ref p.109<br>drawing 13: "evolved<br>hybrid Mousterian";<br>atypical end scraper              | Retouched<br>Flake | 3 | 0.01 | 0.00 | 0.98 | 0.00 | 0.01 | 0.04 |
| Haua<br>Fteah | 55-112.11 Ref p.109<br>drawing 11: "evolved<br>hybrid Mousterian";<br>atypical end scraper              | Retouched<br>Flake | 5 | 0.00 | 0.00 | 0.00 | 0.01 | 0.99 | 0.02 |
| Haua<br>Fteah | 55-112.10 Ref p.109<br>drawing 10: "evolved<br>hybrid Mousterian";<br>atypical end scraper,<br>bifacial | Retouched<br>Flake | 3 | 0.00 | 0.00 | 0.71 | 0.00 | 0.29 | 0.41 |
| Haua<br>Fteah | 52-36.6 Ref p.109<br>drawing 6: "evolved<br>hybrid Mousterian";<br>described as atypical<br>endscraper  | Retouched<br>Flake | 5 | 0.00 | 0.00 | 0.00 | 0.00 | 1.00 | 0.00 |
| Haua<br>Fteah | 52-35.3 Ref p.109<br>drawing 3: "evolved<br>hybrid Mousterian";<br>typical end scraper<br>with notch    | Retouched<br>Flake | 5 | 0.00 | 0.00 | 0.00 | 0.01 | 0.99 | 0.02 |
| Haua<br>Fteah | 55-112.7 Ref p.109<br>drawing 7: "evolved<br>hybrid Mousterian";<br>typical end scraper                 | Retouched<br>Flake | 3 | 0.00 | 0.00 | 0.75 | 0.00 | 0.25 | 0.38 |
| Haua<br>Fteah | 52-30                                                                                                   | Retouched<br>Flake | 5 | 0.00 | 0.00 | 0.00 | 0.00 | 1.00 | 0.00 |
| Haua<br>Fteah | 52-30.                                                                                                  | Retouched<br>Flake | 5 | 0.00 | 0.00 | 0.00 | 0.00 | 1.00 | 0.00 |
| Haua<br>Fteah | 52-30                                                                                                   | Retouched<br>Flake | 5 | 0.00 | 0.00 | 0.00 | 0.00 | 1.00 | 0.00 |
| Haua<br>Fteah | 52-30                                                                                                   | Retouched<br>Flake | 5 | 0.01 | 0.00 | 0.38 | 0.01 | 0.61 | 0.48 |
| Haua<br>Fteah | 55-45.1447                                                                                              | Retouched<br>Flake | 5 | 0.00 | 0.00 | 0.01 | 0.00 | 0.98 | 0.04 |
| Haua<br>Fteah | 55-45.1450                                                                                              | Retouched<br>Flake | 5 | 0.00 | 0.00 | 0.00 | 0.00 | 1.00 | 0.00 |
| Haua<br>Fteah | 55-109.1151                                                                                             | Retouched<br>Flake | 5 | 0.00 | 0.00 | 0.00 | 0.00 | 1.00 | 0.00 |
| Haua<br>Fteah | 55-109.1149                                                                                             | Retouched<br>Flake | 5 | 0.00 | 0.00 | 0.00 | 0.00 | 1.00 | 0.00 |

|               |                                           |                    |   |      |      |      |      |      |      |
|---------------|-------------------------------------------|--------------------|---|------|------|------|------|------|------|
| Haua<br>Fteah | 55-109.1150                               | Retouched<br>Flake | 5 | 0.00 | 0.00 | 0.01 | 0.00 | 0.98 | 0.04 |
| Haua<br>Fteah | 55-109.1154                               | Retouched<br>Flake | 5 | 0.00 | 0.00 | 0.09 | 0.00 | 0.91 | 0.16 |
| Haua<br>Fteah | 55-109.1156 from Box<br>265; backed piece | Retouched<br>Flake | 5 | 0.00 | 0.00 | 0.00 | 0.00 | 1.00 | 0.00 |
| Haua<br>Fteah | 55-109.1157                               | Retouched<br>Flake | 5 | 0.00 | 0.00 | 0.00 | 0.00 | 1.00 | 0.00 |
| Haua<br>Fteah | 55-109.1158                               | Retouched<br>Blade | 5 | 0.00 | 0.00 | 0.28 | 0.01 | 0.71 | 0.42 |
| Haua<br>Fteah | 55-109.1178                               | Retouched<br>Blade | 2 | 0.73 | 0.00 | 0.00 | 0.27 | 0.00 | 0.39 |

## Supplementary Figures:

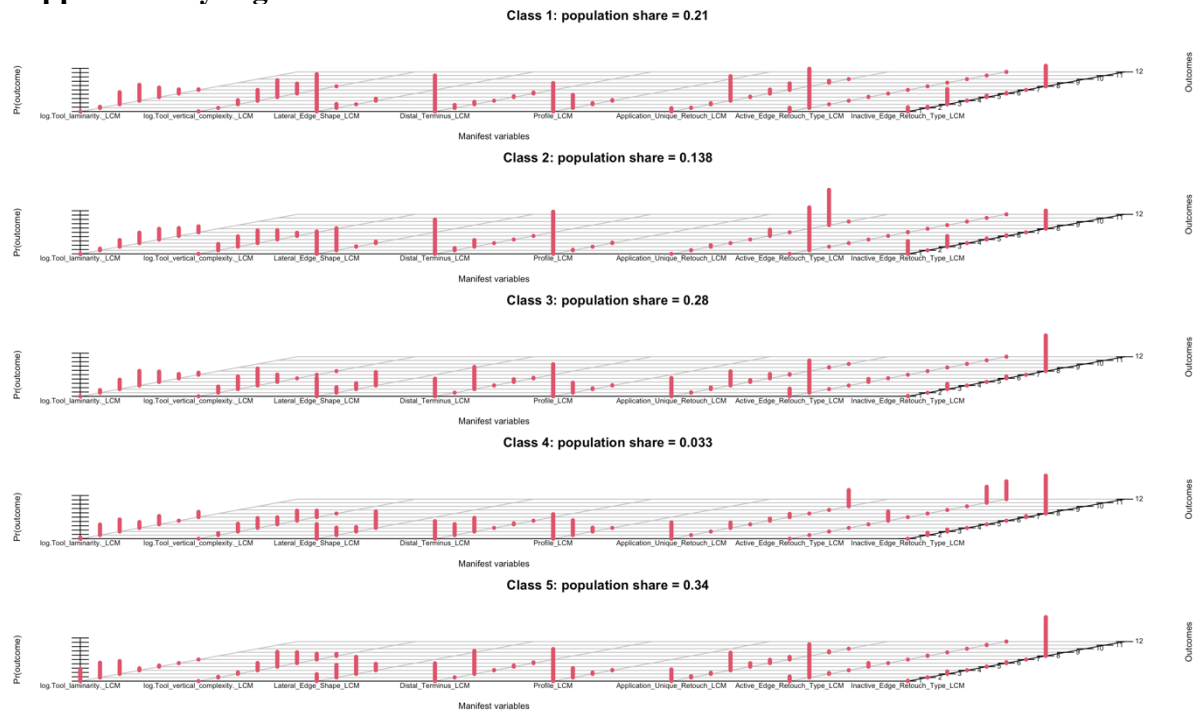

Supplementary Figure S1. Parameter estimates within each latent class.
